# Supplementary material for: Is there a causal link between knee loading and knee osteoarthritis progression? A systematic review and meta-analysis of cohort studies and randomised trials
Source: HighWire-hosted journal article supplement (doi:10.1136/bmjopen-2014-005368), 2014-07-01
Supplement: bmjopen-2014-005368supp2.pdf [file bmjopen-2014-005368supp2.pdf]

# Supplementary file 2: Literature Search Strategies

## PubMed

1. ((knee[Title/Abstract]) OR joint, knee[MeSH Terms]) OR joints, knee[MeSH Terms]
2. ((osteoarthritis[Title/Abstract]) OR osteoarthrosis[Title/Abstract]) OR osteoarthritis[MeSH Terms]
3. (#1) AND #2
4. (((DiseaseExacerbation[Title/Abstract]) OR disease progression[MeSH Terms]) OR disease progressions[MeSH Terms]) OR disease progression[Title/Abstract]
5. (((radiography[MeSH Terms]) OR radiograph\* [Title/Abstract]) OR x-ray\*[Title/Abstract]) OR magneticresonance[MeSH Terms]) OR magneticresonance[Title/Abstract]
6. #4 OR #5
7. (((biomechanics[MeSH Terms]) OR biomechanic\*[Title/Abstract]) OR gait[Title/Abstract]) OR walking[Title/Abstract]
8. #3 AND #6 AND #7

## Scopus

1. knee (Ti-Ab-Key)
2. osteoarthritisOR osteoarthrosis(ti-ab-key)
3. progression OR worsening OR magneticresonance OR radiography OR x-ray (Ti-Ab-Key)
4. biomechanic OR gait OR walking (Ti-Ab-Key)
5. #1 AND #2 AND #3 AND #4

## AMED, CINAHL, SportsDiscus

1. TI knee OR AB knee OR SU knee
2. TI osteoarthritis OR AB Osteoarthritis OR SU osteoarthritis OR AB osteoarthrosis
3. TI Progression OR AB Progression
4. TI worsening OR AB worsening
5. TI x-ray OR AB x-ray
6. TI radiography OR AB radiography
7. TI magnetic resonance OR AB magnetic resonance
8. #3 OR #4 OR #5 OR #6 OR #7
9. TI biomechanic\* OR AB biomechanic\*
10. TI gait OR AB gait
11. TI walking OR AB walking
12. #9 OR #10 OR #11
13. #1 AND #2 AND #8 AND #12
