# Supplementary material for: Is there a causal link between knee loading and knee osteoarthritis progression? A systematic review and meta-analysis of cohort studies and randomised trials
Source: HighWire-hosted journal article supplement (doi:10.1136/bmjopen-2014-005368), 2014-07-01
Supplement: bmjopen-2014-005368supp3.pdf [file bmjopen-2014-005368supp3.pdf]

# Supplementary file 3: Results of the literature search

- Anon. SportsMedUpdate. (Abstracts). British journal of sports medicine 2005;39:971-2.
- Anon. The NIH glucosamine/chondroitin arthritis intervention trial (GAIT). Journal of Pain and Palliative Care Pharmacotherapy 2008;22:39-43.
- Aaboe J, et al. Effects of an intensive weight loss program on knee joint loading in obese adults with knee osteoarthritis. Osteoarthritis and cartilage / OARS, Osteoarthritis Research Society 2011;2011/03/29:822-8.
- Aaboe J, et al. The Influence of Radiographic Severity on the Relationship between Muscle Strength and Joint Loading in Obese Knee Osteoarthritis Patients. Arthritis 2011;2011/11/03:571519.
- Aagaard H, et al. Function of the normal meniscus and consequences of meniscal resection. Scandinavian journal of medicine & science in sports 1999;1999/06/25:134-40.
- Abdallah A. EFFECT OF UNILATERAL AND BILATERAL USE OF Laterally wedged insoles with arch supports on impact loading in medial knee osteoarthritis. British journal of sports medicine 2013;47:16-7.
- Abhishek A, et al. Self-reported knee malalignment in early adult life as an independent risk for knee chondrocalcinosis. Arthritis care & research 2011;2011/10/29:1550-7.
- Ackland DC, et al. Future trends in the use of X-ray fluoroscopy for the measurement and modelling of joint motion. Journal of Engineering in Medicine 2011;225:1136-48.
- Adam RF, et al. Primary total knee arthroplasty in the elderly. Journal of Arthroplasty 1994;9:495-7.
- Adu J, et al. A child with knee pain. British medical journal 2012;344.
- Ageberg E, et al. Effect of leisure time physical activity on severe knee or hip osteoarthritis leading to total joint replacement: A population-based prospective cohort study. BMC musculoskeletal disorders 2012;13.
- Ageberg E, et al. Effects of neuromuscular training (NEMEX-TJR) on patient-reported outcomes and physical function in severe primary hip or knee osteoarthritis: A controlled before-and-after study. BMC musculoskeletal disorders 2013;14.
- Aglietti P, et al. High tibial valgus osteotomy for medial gonarthrosis: a 10- to 21-year study. The journal of knee surgery 2003;2003/02/06:21-6.
- Ahmad M, et al. Distinct, autosomal recessive form of spondyloepimetaphyseal dysplasia segregating in an inbred Pakistani kindred. American journal of medical genetics 1998;1998/08/26:468-73.
- Ahn JH, et al. Long-term results of anterior cruciate ligament reconstruction using bone-patellar tendon-bone: an analysis of the factors affecting the development of osteoarthritis. Arthroscopy : the journal of arthroscopic & related surgery : official publication of the Arthroscopy Association of North America and the International Arthroscopy Association 2012;2012/03/17:1114-23.
- Ajadi RA, et al. Short-term changes in lipid profile following experimental osteoarthritis in dogs. Bulgarian Journal of Veterinary Medicine 2012;15:166-71.
- Akgun U, et al. Tuberculosis of the knee joint: A case report. Acta orthopaedica et traumatologica turcica 2008;42:214-8.
- Akpınar S, et al. Knee joint synovial cyst following total knee arthroplasty with bone allograft. Archives of orthopaedic and trauma surgery 2009;129:7-11.
- Al-Rowaih A, et al. Size of osteonecrosis of the knee. Clinical orthopaedics and related research 1993;68-75.
- Al Kaissi A, et al. Osteochondritis dissecans and Osgood Schlatter disease in a family with Stickler syndrome. Pediatric Rheumatology 2009;7.
- Alekseeva LI, et al. Long-term results of structum® administration (data from a multicenter trial). Terapevticheskii Arkhiv 2003;75:82-6.
- Alekseeva LI, et al. Combined medication artra in the treatment of osteoarthrosis. Terapevticheskii Arkhiv 2005;77:69-75.
- Alexander CJ. Utilisation of joint movement range in arboreal primates compared with human subjects: An evolutionary frame for primary osteoarthritis. Annals of the rheumatic diseases 1994;53:720-5.
- Allain J, et al. Isolated patello-femoral osteoarthritis: Introduction, materials and methods. Revue de chirurgie orthopedique et reparatrice de l'appareil moteur 2004;90:1S69-75.
- Allen KD, et al. Associations of occupational tasks with knee and hip osteoarthritis: the Johnston County Osteoarthritis Project. The Journal of rheumatology 2010;2010/02/17:842-50.
- Allen KD. Racial and ethnic disparities in osteoarthritis phenotypes. Current opinion in rheumatology 2010;2010/05/18:528-32.
- Allen PR, et al. Late degenerative changes after meniscectomy. Factors affecting the knee after operation. The Journal of bone and joint surgery British volume 1984;1984/11/01:666-71.
- Alnahdi AH, et al. Gait after unilateral total knee arthroplasty: frontal plane analysis. Journal of orthopaedic research : official publication of the Orthopaedic Research Society 2011;2011/03/26:647-52.
- Altman RD. Criteria for the classification of osteoarthritis of the knee and hip. Scandinavian journal of rheumatology Supplement 1987;1987/01/01:31-9.
- Altman RD, et al. Commentary: osteoarthritis of the knee and glucosamine. Osteoarthritis and Cartilage 2006;14:963-6.
- Amendola L, et al. Knee joint arthroplasty after tibial osteotomy. International orthopaedics 2010;34:289-95.
- Amin S, et al. Occupation-related squatting, kneeling, and heavy lifting and the knee joint: a magnetic resonance imaging-based study in men. The Journal of rheumatology 2008;2008/07/04:1645-9.

- Anchuela Ocana J, et al. Objective benefits of knee arthroplasty. *Revista de Ortopedia y Traumatologia* 1999;43:327-34.
- Anderson DD, et al. Implementation of discrete element analysis for subject-specific, population-wide investigations of habitual contact stress exposure. *Journal of applied biomechanics* 2010;26:215-23.
- Anderson DD, et al. Reliability of semiautomated computational methods for estimating tibiofemoral contact stress in the Multicenter Osteoarthritis Study. *Computational and mathematical methods in medicine* 2012;2012/10/26:767469.
- Anderson T, et al. Uncemented STAR total ankle prostheses. Three to eight-year follow-up of fifty-one consecutive ankles. *The Journal of bone and joint surgery American volume* 2003;2003/07/10:1321-9.
- Anderst WJ, et al. In vivo serial joint space measurements during dynamic loading in a canine model of osteoarthritis. *Osteoarthritis and Cartilage* 2005;13:808-16.
- Anderst WJ, et al. The association between velocity of the center of closest proximity on subchondral bones and osteoarthritis progression. *Journal of orthopaedic research : official publication of the Orthopaedic Research Society* 2009;2008/07/18:71-7.
- Andrews FJ. Retroperitoneal haematoma after paracetamol increased anticoagulation. *Emergency Medicine Journal* 2002;19:84-5.
- Andrews M, et al. Lower limb alignment and foot angle are related to stance phase knee adduction in normal subjects: A critical analysis of the reliability of gait analysis data. *Journal of Orthopaedic Research* 1996;14:289-95.
- Andriacchi TP. Dynamics of knee malalignment. *Orthopedic Clinics of North America* 1994;25:395-403.
- Andriacchi TP, et al. Methods for evaluating the progression of osteoarthritis. *Journal of rehabilitation research and development* 2000;2000/06/13:163-70.
- Andriacchi TP, et al. A framework for the in vivo pathomechanics of osteoarthritis at the knee. *Annals of biomedical engineering* 2004;2004/04/21:447-57.
- Andriacchi TP, et al. The role of ambulatory mechanics in the initiation and progression of knee osteoarthritis. *Current opinion in rheumatology* 2006;18:514-8.
- Andriacchi TP, et al. Rotational changes at the knee after ACL injury cause cartilage thinning. *Clinical orthopaedics and related research* 2006;2006/01/06:39-44.
- Andriacchi TP, et al. Gait mechanics influence healthy cartilage morphology and osteoarthritis of the knee. *The Journal of bone and joint surgery American volume* 2009;2009/02/21:95-101.
- Appelt CJ, et al. Arthritis-specific health beliefs related to aging among older male patients with knee and/or hip osteoarthritis. *Journals of Gerontology - Series A Biological Sciences and Medical Sciences* 2007;62:184-90.
- Appleton CTG, et al. Forced mobilization accelerates pathogenesis: Characterization of a preclinical surgical model of osteoarthritis. *Arthritis Research and Therapy* 2007;9.
- Argenson JN, et al. Long-term results with a lateral unicondylar replacement. *Clinical orthopaedics and related research* 2008;2008/06/25:2686-93.
- Argenson JNA, et al. Minimally invasive unicompartmental knee arthroplasty. *The Knee* 2004;11:341-7.
- Armagan O, et al. Inhalation therapy of calcitonin relieves osteoarthritis of the Knee. *Journal of Korean Medical Science* 2012;27:1405-10.
- Asay JL, et al. Adaptive patterns of movement during stair climbing in patients with knee osteoarthritis. *Journal of orthopaedic research : official publication of the Orthopaedic Research Society* 2009;2008/10/15:325-9.
- Ashraf T, et al. Symmetrical vs asymmetrical total knee replacement--a medium term comparative analysis. *The Knee* 2003;2003/03/22:61-6.
- Astephen JL, et al. Changes in frontal plane dynamics and the loading response phase of the gait cycle are characteristic of severe knee osteoarthritis application of a multidimensional analysis technique. *Clinical Biomechanics* 2005;20:209-17.
- Astephen JL, et al. Gait and neuromuscular pattern changes are associated with differences in knee osteoarthritis severity levels. *Journal of biomechanics* 2008;41:868-76.
- Astephen JL, et al. Biomechanical changes at the hip, knee, and ankle joints during gait are associated with knee osteoarthritis severity. *Journal of orthopaedic research : official publication of the Orthopaedic Research Society* 2008;2007/10/26:332-41.
- Astephen JL. Challenges in dealing with walking speed in knee osteoarthritis gait analyses. *Clinical Biomechanics* 2012;27:210-2.
- Azzoni R. Clinical results in treatment of osteoarthritis of the knee with intraarticular hyaluronic acid. *Reumatismo* 1994;46:74-80.
- Bae JY, et al. Biomechanical analysis of the effects of medial meniscectomy on degenerative osteoarthritis. *Medical & biological engineering & computing* 2012;2011/11/01:53-60.
- Baert IAC, et al. Gait characteristics and lower limb muscle strength in women with early and established knee osteoarthritis. *Clinical Biomechanics* 2013;28:40-7.
- Baier C, et al. Comparing navigation-based in vivo knee kinematics pre- and postoperatively between a cruciate-retaining and a cruciate-substituting implant. *International orthopaedics* 2013;2013/01/31:407-14.
- Baker-LePain JC, et al. Role of bone architecture and anatomy in osteoarthritis. *Bone* 2012;2012/03/10:197-203.
- Baker K, et al. A randomized crossover trial of a wedged insole for treatment of knee osteoarthritis. *Arthritis and rheumatism* 2007;56:1198-203.
- Baliunas AJ, et al. Increased knee joint loads during walking are present in subjects with knee osteoarthritis. *Osteoarthritis and cartilage / OARS, Osteoarthritis Research Society* 2002;2002/07/20:573-9.

- Bamac B, et al. Evaluation of medial and lateral meniscus thicknesses in early osteoarthritis of the knee with magnetic resonance imaging. *Saudi medical journal* 2006;2006/06/08:854-7.
- Bargiotas K, et al. Arthrodesis of the knee with a long intramedullary nail following the failure of a total knee arthroplasty as the result of infection. *Surgical technique. The Journal of bone and joint surgery American volume* 2007;2007/03/03:103-10.
- Barker K, et al. Association between radiographic joint space narrowing, function, pain and muscle power in severe osteoarthritis of the knee. *Clinical rehabilitation* 2004;2004/12/03:793-800.
- Barrack RL, et al. Component rotation and anterior knee pain after total knee arthroplasty. *Clinical orthopaedics and related research* 2001;2001/11/22:46-55.
- Barrant PJ, et al. Do ACL-injured copers exhibit differences in knee kinematics?: An MRI study. *Clinical orthopaedics and related research* 2007;2006/11/09:74-80.
- Barrett WP, et al. Comparison of radiographic alignment of imageless computer-assisted surgery vs conventional instrumentation in primary total knee arthroplasty. *Journal of Arthroplasty* 2011;26:1273-84.
- Barrios J. Progression of dynamic knee loading at one year in medial knee osteoarthritis: the influence of baseline load... Combined Sections Meeting 2008: section on geriatrics poster and platform presentations. February 6-9, 2008, Nashville, TN. *Journal of Geriatric Physical Therapy* 2007;30:148-9.
- Barrios JA, et al. Dynamic Versus Radiographic Alignment in Relation to Medial Knee Loading in Symptomatic Osteoarthritis. *Journal of applied biomechanics* 2011;2011/11/16.
- Bartels EM, et al. Aquatic exercise for the treatment of knee and hip osteoarthritis. *Cochrane database of systematic reviews (Online)* 2007;2007/10/19:CD005523.
- Bastick AN. Incident knee osteoarthritis-related outcomes and slower walking speed: Comment on the article by Purser et al. *Arthritis care & research* 2012;64:1937-8.
- Baur W, et al. Proximal tibial osteotomy for osteoarthritis of the knee with varus deformity. *Operative Orthopädie und Traumatologie* 2005;17:326-44.
- Beary JF, III. Joint structure modification in osteoarthritis: development of SMOAD drugs. *Current rheumatology reports* 2001;2001/11/16:506-12.
- Beischer AD, et al. Functional outcome and gait analysis after triple or double arthrodesis. *Foot & ankle international / American Orthopaedic Foot and Ankle Society [and] Swiss Foot and Ankle Society* 1999;1999/10/06:545-53.
- Belcaro G, et al. Variations in C-reactive protein, plasma free radicals and fibrinogen values in patients with osteoarthritis treated with Pycnogenol. *Redox report : communications in free radical research* 2008;2008/11/20:271-6.
- Bellemans J, et al. Fluoroscopic analysis of the kinematics of deep flexion in total knee arthroplasty. Influence of posterior condylar offset. *The Journal of bone and joint surgery British volume* 2002;2002/02/12:50-3.
- Benedetti MG, et al. Is there a role for patellar and quadriceps tendons impairment on knee function during gait in patients who are obese?... Patellofemoral pain syndrome: proximal, distal, and local factors, an international research retreat, April 30-May 2, 2009, Fells Point, Baltimore, MD. *Journal of orthopaedic and sports physical therapy* 2010;40:A43-A44.
- Bennell KL, et al. The effects of hip muscle strengthening on knee load, pain, and function in people with knee osteoarthritis: a protocol for a randomised, single-blind controlled trial. *BMC musculoskeletal disorders* 2007;2007/12/11:121.
- Bennell KL, et al. Hip strengthening reduces symptoms but not knee load in people with medial knee osteoarthritis and varus malalignment: a randomised controlled trial. *Osteoarthritis and cartilage / OARS, Osteoarthritis Research Society* 2010;2010/02/24:621-8.
- Bennell KL, et al. Bone marrow lesions are related to dynamic knee loading in medial knee osteoarthritis. *Annals of the rheumatic diseases* 2010;69:1151-4.
- Bennell KL, et al. Comparison of neuromuscular and quadriceps strengthening exercise in the treatment of varus malaligned knees with medial knee osteoarthritis: a randomised controlled trial protocol. *BMC musculoskeletal disorders* 2011;2011/12/07:276.
- Bennell KL, et al. Higher dynamic medial knee load predicts greater cartilage loss over 12 months in medial knee osteoarthritis. *Annals of the rheumatic diseases* 2011;2011/07/12:1770-4.
- Bennell KL, et al. Effects of a modified shoe on knee load in people with and those without knee osteoarthritis. *Arthritis and rheumatism* 2013;2012/12/04:701-9.
- Bennemann M, et al. [Pathogenesis of knee osteoarthritis]. *MMW Fortschritte der Medizin* 2007;2007/08/24:25-7.
- Berning ET, et al. Thermal Damage and Tracker-Pin Track Infection in Computer-Navigated Total Knee Arthroplasty. *Journal of Arthroplasty* 2011;26:977.
- Berry PA, et al. The role of biomechanical factors on patellofemoral osteoarthritis. *Current Rheumatology Reviews* 2007;3:123-7.
- Beyaert C, et al. The effect of inturning of the foot on knee kinematics and kinetics in children with treated idiopathic clubfoot. *Clinical Biomechanics* 2003;18:670-6.
- Beyaert C, et al. The effect of tibio-talar arthrodesis on foot kinematics and ground reaction force progression during walking. *Gait and Posture* 2004;20:84-91.
- Beynon BD, et al. Accelerated versus nonaccelerated rehabilitation after anterior cruciate ligament reconstruction: a prospective, randomized, double-blind investigation evaluating knee joint laxity using roentgen stereophotogrammetric analysis. *The American journal of sports medicine* 2011;2011/09/29:2536-48.

- Bhan S, et al. High valgus tibial osteotomy for osteoarthritis of the knee. *International orthopaedics* 1992;1992/01/01:13-7.
- Bierlaire JP, et al. Total knee arthroplasty with total condylar prosthesis. *Acta orthopaedica Belgica* 1990;56:569-75.
- Bijlsma JW, et al. Strategies for the prevention and management of osteoarthritis of the hip and knee. *Best practice & research Clinical rheumatology* 2007;2007/03/14:59-76.
- Bilgici A, et al. The influence of weight loss on symptomatic relief of knee osteoarthritis. *Journal of Rheumatology and Medical Rehabilitation* 2001;12:232-5.
- Birmingham TB, et al. Association among neuromuscular and anatomic measures for patients with knee osteoarthritis. *Archives of physical medicine and rehabilitation* 2001;2001/08/09:1115-8.
- Birmingham TB, et al. Medial opening wedge high tibial osteotomy: a prospective cohort study of gait, radiographic, and patient-reported outcomes. *Arthritis and rheumatism* 2009;2009/05/01:648-57.
- Bito H, et al. Opening wedge high tibial osteotomy affects both the lateral patellar tilt and patellar height. *Knee surgery, sports traumatology, arthroscopy : official journal of the ESSKA* 2010;2010/03/11:955-60.
- Bizzini M, et al. Rehabilitation guidelines after total knee arthroplasty. *Orthopade* 2003;32:527-34.
- Blin O, et al. Quantitative analysis of walking in patients with knee osteoarthritis: A method of assessing the effectiveness of non-steroidal anti-inflammatory treatment. *Annals of the rheumatic diseases* 1990;49:990-3.
- Block JA, et al. The biomechanics of osteoarthritis: Implications for therapy. *Current rheumatology reports* 2009;11:15-22.
- Block JA, et al. Lower limb osteoarthritis: biomechanical alterations and implications for therapy. *Current opinion in rheumatology* 2010;2010/07/02:544-50.
- Bohannon RW, et al. Distribution and progression of muscle weakness in two cases of polymyositis. *Isokinetics and Exercise Science* 2012;20:1-4.
- Bolog N, et al. MR imaging of the posterolateral corner of the knee. *Skeletal radiology* 2007;2007/03/06:715-28.
- Bonnet CS, et al. AMPA/kainate glutamate receptors contribute to inflammation, degeneration and pain related behaviour in inflammatory stages of arthritis. *Annals of the rheumatic diseases* 2013;2013/10/17.
- Boockvar M, et al. The short-term effects of running on the deformation of knee articular cartilage and its relationship to biomechanical loads at the knee. *Osteoarthritis and cartilage / OARS, Osteoarthritis Research Society* 2009;2009/02/28:883-90.
- Borotikar BS, et al. A methodology to accurately quantify patellofemoral cartilage contact kinematics by combining 3D image shape registration and cine-PC MRI velocity data. *Journal of biomechanics* 2012;2012/01/31:1117-22.
- Borotikar BS, et al. In vivo patellofemoral contact mechanics during active extension using a novel dynamic MRI-based methodology. *Osteoarthritis and cartilage / OARS, Osteoarthritis Research Society* 2013;2013/09/10.
- Bourne RB, et al. Resurfacing versus not resurfacing the patella during total knee replacement. *Clinical orthopaedics and related research* 1995;156-61.
- Bowditch M, et al. Successful two-stage revision of a KineSpring® joint unloading implant: A case study. *International Medical Case Reports Journal* 2012;5:91-5.
- Boyer KA, et al. Gender differences exist in the hip joint moments of healthy older walkers. *Journal of biomechanics* 2008;41:3360-5.
- Boyer KA, et al. Sensitivity of gait parameters to the effects of anti-inflammatory and opioid treatments in knee osteoarthritis patients. *Journal of orthopaedic research : official publication of the Orthopaedic Research Society* 2012;2011/12/20:1118-24.
- Bradbury N, et al. Participation in sports after total knee replacement. *American Journal of Sports Medicine* 1998;26:530-5.
- Braham R, et al. The effect of glucosamine supplementation on people experiencing regular knee pain... including commentary by McNaughton L. *British journal of sports medicine* 2003;37:45-9.
- Brakke R, et al. Physical Therapy in Persons With Osteoarthritis. *PM and R* 2012;4:S53-S58.
- Brandon SCE, et al. Robust features of knee osteoarthritis in joint moments are independent of reference frame selection. *Clinical Biomechanics* 2011;26:65-70.
- Brandt KD, et al. Anterior (cranial) cruciate ligament transection in the dog: a bona fide model of osteoarthritis, not merely of cartilage injury and repair. *The Journal of rheumatology* 1991;1991/03/01:436-46.
- Brandt KD, et al. Hyaluronan injection affects neither osteoarthritis progression nor loading of the OA knee in dogs. *Biorheology* 2004;2004/08/10:493-502.
- Brennan SL, et al. Women lose patella cartilage at a faster rate than men: a 4.5-year cohort study of subjects with knee OA. *Maturitas* 2010;2010/08/17:270-4.
- Brennan SL, et al. Bone mineral density is cross sectionally associated with cartilage volume in healthy, asymptomatic adult females: Geelong Osteoporosis Study. *Bone* 2011;2011/07/05:839-44.
- Briem K, et al. Effects of the amount of valgus correction for medial compartment knee osteoarthritis on clinical outcome, knee kinetics and muscle co-contraction after opening wedge high tibial osteotomy. *Journal of Orthopaedic Research* 2007;25:311-8.
- Briem K, et al. Proximal gait adaptations in medial knee OA. *Journal of orthopaedic research : official publication of the Orthopaedic Research Society* 2009;2008/07/18:78-83.
- Briem K, et al. Medial knee joint loading increases in those who respond to hyaluronan injection for medial knee osteoarthritis. *Journal of Orthopaedic Research* 2009;27:1420-5.

- Brinkman J, et al. Osteotomies around the knee: patient selection, stability of fixation and bone healing in high tibial osteotomies. *Journal of Bone and Joint Surgery* 2008;90B:1548-57.
- Brouwer RW, et al. Braces and orthoses for treating osteoarthritis of the knee. *Cochrane database of systematic reviews* (Online) 2005;2005/01/28:CD004020.
- Brouwer RW, et al. Osteotomy for medial compartment arthritis of the knee using a closing wedge or an opening wedge controlled by a Puddu plate: A ONE-YEAR RANDOMISED, CONTROLLED STUDY. *Journal of Bone and Joint Surgery* 2006;88B:1454-9.
- Brown GA, et al. Radiographic Evaluation and Preoperative Planning for High Tibial Osteotomies. *Operative Techniques in Sports Medicine* 2012;20:93-102.
- Bruce-Brand RA, et al. Effects of home-based resistance training and neuromuscular electrical stimulation in knee osteoarthritis: A randomized controlled trial. *BMC musculoskeletal disorders* 2012;13.
- Brugioni DJ, et al. A functional and radiographic analysis of the total condylar knee arthroplasty. *The Journal of arthroplasty* 1990;1990/06/01:173-80.
- Bruni D, et al. Minimally invasive unicompartmental knee replacement: retrospective clinical and radiographic evaluation of 83 patients. *Knee surgery, sports traumatology, arthroscopy : official journal of the ESSKA* 2010;2009/09/19:710-7.
- Bruyere O, et al. Glucosamine and chondroitin sulfate as therapeutic agents for knee and hip osteoarthritis. *Drugs & aging* 2007;2007/07/31:573-80.
- Buckland-Wright C. Subchondral bone changes in hand and knee osteoarthritis detected by radiography. *Osteoarthritis and cartilage / OARS, Osteoarthritis Research Society* 2004;2003/12/31:S10-S19.
- Burger C, et al. The sheep as a knee osteoarthritis model: early cartilage changes after meniscus injury and repair. *Laboratory animals* 2007;2007/11/09:420-31.
- Burns R, et al. Differences of self-reported osteoarthritis disability and race. *Journal of the National Medical Association* 2007;2007/10/05:1046-51.
- Butler RJ, et al. The effect of a subject-specific amount of lateral wedge on knee mechanics in patients with medial knee osteoarthritis. *Journal of orthopaedic research : official publication of the Orthopaedic Research Society* 2007;2007/05/01:1121-7.
- Butler RJ, et al. Gait mechanics after ACL reconstruction: implications for the early onset of knee osteoarthritis. *British journal of sports medicine* 2009;2008/12/02:366-70.
- Caborn DNM, et al. The natural history of the anterior cruciate ligament-deficient knee: A review. *Clinics in Sports Medicine* 1993;12:625-36.
- Cahue S, et al. Varus-valgus alignment in the progression of patellofemoral osteoarthritis. *Arthritis and rheumatism* 2004;50:2184-90.
- Cake MA, et al. The nitric oxide donor glyceryl trinitrate increases subchondral bone sclerosis and cartilage degeneration following ovine meniscectomy. *Osteoarthritis and cartilage / OARS, Osteoarthritis Research Society* 2004;2004/11/27:974-81.
- Cameron M, et al. The natural history of the anterior cruciate ligament-deficient knee. Changes in synovial fluid cytokine and keratan sulfate concentrations. *The American journal of sports medicine* 1997;1997/12/16:751-4.
- Carbone LD, et al. Assistive Walking Device Use and Knee Osteoarthritis: the Health, Aging, and Body Composition Study (Health ABC Study). *Archives of physical medicine and rehabilitation* 2012;2012/10/09.
- Cartier P, et al. Clinical and radiographic evaluation of modular knee replacement. A review of 95 cases. *International orthopaedics* 1982;1982/01/01:35-44.
- Catani F, et al. In vivo kinematics and kinetics of a bi-cruciate substituting total knee arthroplasty: a combined fluoroscopic and gait analysis study. *Journal of orthopaedic research : official publication of the Orthopaedic Research Society* 2009;2009/07/03:1569-75.
- Catani F, et al. The Mark Coventry Award: Articular contact estimation in TKA using in vivo kinematics and finite element analysis. *Clinical orthopaedics and related research* 2010;2009/06/24:19-28.
- Celiker R. Current treatment approaches for osteoarthritis in the elderly. *Türkiye Fiziksel Tip ve Rehabilitasyon Dergisi* 2009;55:75-9.
- Cetin N, et al. Comparing hot pack, short-wave diathermy, ultrasound, and TENS on isokinetic strength, pain, and functional status of women with osteoarthritic knees: a single-blind, randomized, controlled trial. *American Journal of Physical Medicine & Rehabilitation* 2008;87:443-51.
- Chang A, et al. Thrust during ambulation and the progression of knee osteoarthritis. *Arthritis and rheumatism* 2004;2004/12/14:3897-903.
- Chang A, et al. Hip abduction moment and protection against medial tibiofemoral osteoarthritis progression. *Arthritis and rheumatism* 2005;2005/10/29:3515-9.
- Chang A, et al. The relationship between toe-out angle during gait and progression of medial tibiofemoral osteoarthritis. *Annals of the rheumatic diseases* 2007;2007/02/03:1271-5.
- Chang A, et al. Frequency of varus and valgus thrust and factors associated with thrust presence in persons with or at higher risk of developing knee osteoarthritis. *Arthritis and rheumatism* 2010;62:1403-11.
- Chang AH, et al. TOE-OUT ANGLE DURING GAIT AND PROTECTION AGAINST PROGRESSION OF MEDIAL TIBIOFEMORAL KNEE OSTEOARTHRITIS. (Abstract). *Journal of orthopaedic and sports physical therapy* 2005;35:A21.
- Chang AH, et al. THE HIP ABDUCTION MOMENT AND PROGRESSION OF KNEE OSTEOARTHRITIS. (Abstract). *Journal of orthopaedic and sports physical therapy* 2005;35:A2.
- Chang AH, et al. Varus thrust and knee frontal plane dynamic motion in persons with knee osteoarthritis. *Osteoarthritis and Cartilage* 2013;21:1668-73.

- Chang CW, et al. Kinematic navigation in total knee replacement--experience from the first 50 cases. *Journal of the Formosan Medical Association = Taiwan yi zhi* 2006;2006/06/28:468-74.
- Chang QZ, et al. Alternation of trunk movement after arthroplasty in patients with osteoarthritis of the knee. *Journal of orthopaedic science : official journal of the Japanese Orthopaedic Association* 2011;2011/05/10:382-8.
- Chantarapanich N, et al. A finite element study of stress distributions in normal and osteoarthritic knee joints. *Journal of the Medical Association of Thailand = Chotmaihet thangphaet* 2009;2010/02/04:S97-103.
- Chao EY, et al. Computer-aided preoperative planning in knee osteotomy. *The Iowa orthopaedic journal* 1995;1995/01/01:4-18.
- Chaudhari AMW, et al. Knee kinematics, cartilage morphology, and osteoarthritis after ACL injury. *Medicine and science in sports and exercise* 2008;40:215-22.
- Chautems R, et al. [Bifocal avulsion of the patellar tendon in an adult: a case report]. *Revue de chirurgie orthopedique et repara-trice de l'appareil moteur* 2001;2001/06/30:388-91.
- Cheng CK, et al. Surgery simulation analysis of anterior advancement of the tibial tuberosity. *Clinical biomechanics (Bristol, Avon)* 1995;1995/04/01:115-21.
- Chevalier X. Early diagnosis of knee osteoarthritis. *Revue du Praticien* 2009;59:1243-5+1248.
- Childs JD, et al. Alterations in lower extremity movement and muscle activation patterns in individuals with knee osteoarthritis. *Clinical Biomechanics* 2004;19:44-9.
- Cho TJ, et al. TRPV4-pathway manifesting both skeletal dysplasia and peripheral neuropathy: A report of three patients. *American Journal of Medical Genetics, Part A* 2012;158 A:795-802.
- Choi JA, et al. MR imaging of articular cartilage physiology. *Magnetic resonance imaging clinics of North America* 2011;2011/06/15:249-82.
- Chotanaphuti T, et al. The rotational axis of the tibia and relationship to the tibial torsion in varus osteoarthritic knee. *Journal of the Medical Association of Thailand = Chotmaihet thangphaet* 2012;2013/03/05:S6-11.
- Chotivichit AL, et al. Total knee arthroplasty using the total condylar III knee prosthesis. *Journal of Arthroplasty* 1991;6:341-50.
- Chouteau J, et al. Kinematics of a cementless mobile bearing posterior cruciate ligament-retaining total knee arthroplasty. *The Knee* 2009;2008/12/17:223-7.
- Chu LX, et al. [Biomechanical and morphological measurement and analysis of roentgenograph for knee osteoarthritis patients]. *Zhong xi yi jie he xue bao = Journal of Chinese integrative medicine* 2004;2004/11/13:432-4.
- Chung BJ, et al. Differences between sagittal femoral mechanical and distal reference axes should be considered in navigated TKA. *Clinical orthopaedics and related research* 2009;2009/02/27:2403-13.
- Cibere J, et al. Reliability of the knee examination in osteoarthritis: effect of standardization. *Arthritis and rheumatism* 2004;2004/02/12:458-68.
- Cibere J, et al. Association of clinical findings with pre-radiographic and radiographic knee osteoarthritis in a population-based study. *Arthritis care & research* 2010;2010/07/29:1691-8.
- Clarke JV, et al. Non-invasive computer-assisted measurement of knee alignment. *Computer aided surgery : official journal of the International Society for Computer Aided Surgery* 2012;2011/12/02:29-39.
- Clayton ML, et al. Correction of alignment deformities during total knee arthroplasties: staged soft-tissue releases. *Clinical orthopaedics and related research* 1986;1986/01/01:117-24.
- Clockaerts S, et al. Statin use is associated with reduced incidence and progression of knee osteoarthritis in the Rotterdam study. *Annals of the rheumatic diseases* 2012;2011/10/13:642-7.
- Coggon D, et al. Occupational physical activities and osteoarthritis of the knee. *Arthritis Rheum* 2000;43:1443-9.
- Cohen ZA, et al. Computer simulations of patellofemoral joint surgery: patient-specific models for tuberosity transfer. *The American journal of sports medicine* 2003;31:87-98.
- Colbert CJ, et al. Knee confidence as it relates to physical function outcome in persons with or at high risk of knee osteoarthritis in the osteoarthritis initiative. *Arthritis and rheumatism* 2012;64:1437-46.
- Cole BJ, et al. Degenerative arthritis of the knee in active patients: evaluation and management. *The Journal of the American Academy of Orthopaedic Surgeons* 1999;2001/08/17:389-402.
- Cole BJ, et al. Use of a lateral offset short-leg walking cast before high tibial osteotomy. *Clinical orthopaedics and related research* 2003;408:209-17.
- Collier MB, et al. Patient, implant, and alignment factors associated with revision of medial compartment unicompartmental arthroplasty. *The Journal of arthroplasty* 2006;2006/09/05:108-15.
- Collins A, et al. The impact of stochastic resonance electrical stimulation and knee sleeve on impulsive loading and muscle co-contraction during gait in knee osteoarthritis. *Clinical Biomechanics* 2011;26:853-8.
- Collins B, et al. A case series of lateral opening wedge high tibial osteotomy for valgus malalignment. *Knee surgery, sports traumatology, arthroscopy : official journal of the ESSKA* 2012;2012/06/19.
- Conesa X, et al. Stress fracture of the femoral neck as a complication of total arthroplasty of the knee: Clinical case and literature review. *Current Orthopaedic Practice* 2012;23:158-62.

- Confalonieri N, et al. Mini-invasive computer assisted bi-unicompartimental knee replacement. The international journal of medical robotics + computer assisted surgery : MRCAS 2005;2007/05/24:45-50.
- Conroy MB, et al. Muscle strength, mass, and quality in older men and women with knee osteoarthritis. Arthritis care & research 2012;2012/01/04:15-21.
- Conrozier T, et al. Early effect of hyaluronic acid intra-articular injections on serum and urine biomarkers in patients with knee osteoarthritis: An open-label observational prospective study. Journal of orthopaedic research : official publication of the Orthopaedic Research Society 2012;2011/10/26:679-85.
- Cooke TD, et al. Analysis of limb alignment in the pathogenesis of osteoarthritis: a comparison of Saudi Arabian and Canadian cases. Rheumatology international 2002;2002/08/13:160-4.
- Cooke TDV, et al. Axial alignment of the lower limb and its association with disorders of the knee. Operative Techniques in Sports Medicine 2000;8:98-107.
- Cooper C, et al. Mechanical and constitutional risk factors for symptomatic knee osteoarthritis: differences between medial tibiofemoral and patellofemoral disease. The Journal of rheumatology 1994;1994/02/01:307-13.
- Cordier W. Slipped capital femoral epiphysis. Padiatrische Praxis 2006;69:327-37.
- Coughlin KM, et al. In vivo loads in the medial compartment of the rabbit knee. Clinical biomechanics (Bristol, Avon) 2005;2005/08/16:1007-9.
- Crawford C, et al. Anatomic double bundle ACL reconstruction: a literature review. Knee surgery, sports traumatology, arthroscopy : official journal of the ESSKA 2007;2007/05/31:946-64.
- Crawford JR, et al. Total knee arthroplasty in a below-knee amputee. Journal of Arthroplasty 2003;18:662-5.
- Creaby MW, et al. Varus-valgus laxity and passive stiffness in medial knee osteoarthritis. Arthritis care & research 2010;2010/05/28:1237-43.
- Creaby MW, et al. Dynamic knee loading is related to cartilage defects and tibial plateau bone area in medial knee osteoarthritis. Osteoarthritis and cartilage / OARS, Osteoarthritis Research Society 2010;2010/09/08:1380-5.
- Creaby MW, et al. Insole effects on impact loading during walking. ergonomics 2011;54:665-71.
- Creaby MW, et al. Gait differs between unilateral and bilateral knee osteoarthritis. Archives of physical medicine and rehabilitation 2012;2012/03/06:822-7.
- Creamer P, et al. Determinants of pain severity in knee osteoarthritis: effect of demographic and psychosocial variables using 3 pain measures. The Journal of rheumatology 1999;1999/08/18:1785-92.
- Crema MD, et al. Peripatellar synovitis: comparison between non-contrast-enhanced and contrast-enhanced MRI and association with pain. The MOST study. Osteoarthritis and cartilage / OARS, Osteoarthritis Research Society 2013;2013/01/02:413-8.
- Crossley KM, et al. Altered hip muscle forces during gait in people with patellofemoral osteoarthritis. Osteoarthritis and cartilage / OARS, Osteoarthritis Research Society 2012;2012/08/14:1243-9.
- Cubukcu D, et al. Hylan G-F 20 efficacy on articular cartilage quality in patients with knee osteoarthritis: clinical and MRI assessment. Clinical rheumatology 2005;2004/12/16:336-41.
- Curkovic M, et al. Proximal tibial stress fracture associated with mild osteoarthritis of the knee: Case report. Acta Clinica Croatica 2011;50:107-11.
- D'Lima DD, et al. The Mark Coventry award: In vivo knee forces during recreation and exercise after knee arthroplasty. Clinical orthopaedics and related research 2008;466:2605-11.
- Daans M, et al. GDF5 deficiency in mice is associated with instability-driven joint damage, gait and subchondral bone changes. Annals of the rheumatic diseases 2011;70:208-13.
- Daniilidis K, et al. Highly conforming polyethylene inlays reduce the in vivo variability of knee joint kinematics after total knee arthroplasty. The Knee 2012;2011/05/13:260-5.
- De Carlo M, et al. Rehabilitation of the Knee Following Sports Injury. Clinics in Sports Medicine 2010;29:81-106.
- Deakin AH, et al. Natural distribution of the femoral mechanical-anatomical angle in an osteoarthritic population and its relevance to total knee arthroplasty. The Knee 2012;2011/03/01:120-3.
- Debi R, et al. Correlation between single limb support phase and self-evaluation questionnaires in knee osteoarthritis populations. Disability and rehabilitation 2011;2011/01/07:1103-9.
- DeFrate LE, et al. The 6 degrees of freedom kinematics of the knee after anterior cruciate ligament deficiency: an in vivo imaging analysis. The American journal of sports medicine 2006;2006/04/26:1240-6.
- DellaMaggiora R, et al. Osteochondritis Dissecans of the Adult Knee. Operative Techniques in Sports Medicine 2008;16:65-9.
- Deluzio KJ. MECHANICAL FACTORS OF KNEE OSTEOARTHRITIS DETECTED THROUGH GAIT ANALYSIS. (Abstract). In Canadian Society for Biomechanics, Proceedings, 13th Biennial Conference, Canadian Society for Biomechanics, Halifax Aug 4-7 2004, Nova Scotia, Canadian Institutes of Health Research, 2004, p.146.Canada: 2004.
- Dempsey AR, et al. The relationship between patellofemoral and tibiofemoral morphology and gait biomechanics following arthroscopic partial medial meniscectomy. Knee Surgery, Sports Traumatology, Arthroscopy 2013;21:1097-103.
- Deneweth JM, et al. Tibiofemoral joint kinematics of the anterior cruciate ligament-reconstructed knee during a single-legged hop landing. The American journal of sports medicine 2010;2010/05/18:1820-8.

- Dennis DA, et al. Gap balancing versus measured resection technique for total knee arthroplasty. *Clinical orthopaedics and related research* 2010;2009/10/01:102-7.
- Derek T, et al. Radiographic grading for knee osteoarthritis. A revised scheme that relates to alignment and deformity. *The Journal of rheumatology* 1999;1999/03/25:641-4.
- Desmeules F, et al. Waiting for total knee replacement surgery: factors associated with pain, stiffness, function and quality of life. *BMC musculoskeletal disorders* 2009;2009/05/22:52.
- Dieppe P, et al. The Bristol 'OA500 study': Progression and impact of the disease after 8 years. *Osteoarthritis and Cartilage* 2000;8:63-8.
- Dieppe PA, et al. The Bristol 'OA500' study: progression of osteoarthritis (OA) over 3 years and the relationship between clinical and radiographic changes at the knee joint. *Osteoarthritis and cartilage / OARS, Osteoarthritis Research Society* 1997;1997/03/01:87-97.
- Dieppe PA, et al. Pathogenesis and management of pain in osteoarthritis. *Lancet* 2005;365:965-73.
- Dillon CF, et al. Prevalence of knee osteoarthritis in the United States: arthritis data from the Third National Health and Nutrition Examination Survey 1991-94. *The Journal of rheumatology* 2006;2006/10/03:2271-9.
- Doral MN, et al. Meniscectomy. *Techniques in Knee Surgery* 2010;9:150-8.
- Doschak MR, et al. Antiresorptive therapy conserves some periarticular bone and ligament mechanical properties after anterior cruciate ligament disruption in the rabbit knee. *Journal of orthopaedic research : official publication of the Orthopaedic Research Society* 2004;2004/08/12:942-8.
- Dossett HG, et al. Kinematically versus mechanically aligned total knee arthroplasty. *Orthopedics* 2012;2012/02/09:e160-e169.
- Dowling AV, et al. Gait modification via verbal instruction and an active feedback system to reduce peak knee adduction moment. *Journal of biomechanical engineering* 2010;132.
- Draganich L, et al. The effectiveness of self-adjustable custom and off-the-shelf bracing in the treatment of varus gonarthrosis. *The Journal of bone and joint surgery American volume* 2006;2006/12/05:2645-52.
- Dretakis EK, et al. Cervical hip fractures do not occur in arthrotic joints: A clinicoradiographic study of 256 patients. *Acta Orthopaedica Scandinavica* 1998;69:384-6.
- Duncan CP. Fusion takedown: Can be a letdown. *Orthopedics* 2007;30:758-9.
- Dunlop DD, et al. Moving to Maintain Function in Knee Osteoarthritis: Evidence From the Osteoarthritis Initiative. *Archives of physical medicine and rehabilitation* 2010;91:714-21.
- Durmus D, et al. Assessment of the effect of glucosamine sulfate and exercise on knee cartilage using magnetic resonance imaging in patients with knee osteoarthritis: A randomized controlled clinical trial. *J Back Musculoskelet Rehabil* 2012;25:275-84.
- Dutoit M. Percutaneous partial epiphysiodesis for persistent adolescent genu valgum. *Revue de chirurgie orthopedique et reparatrice de l'appareil moteur* 1998;84:623-7.
- Ebert JR, et al. Traditional vs accelerated approaches to post-operative rehabilitation following matrix-induced autologous chondrocyte implantation (MACI): comparison of clinical, biomechanical and radiographic outcomes. *Osteoarthritis and cartilage / OARS, Osteoarthritis Research Society* 2008;2008/04/25:1131-40.
- Ebert JR, et al. A randomized trial comparing accelerated and traditional approaches to postoperative weightbearing rehabilitation after matrix-induced autologous chondrocyte implantation: Findings at 5 years. *American Journal of Sports Medicine* 2012;40:1527-37.
- Ebert JR, et al. Factors predictive of outcome 5 years after matrix-induced autologous chondrocyte implantation in the tibiofemoral joint. *The American journal of sports medicine* 2013;2013/04/27:1245-54.
- Eckhoff DG, et al. Location of the femoral sulcus in the osteoarthritic knee. *The Journal of arthroplasty* 1996;1996/02/01:163-5.
- Eckstein F, et al. In vivo cartilage deformation after different types of activity and its dependence on physical training status. *Annals of the rheumatic diseases* 2005;2005/01/14:291-5.
- Eckstein F, et al. Patterns of femorotibial cartilage loss in knees with neutral, varus, and valgus alignment. *Arthritis and rheumatism* 2008;2008/11/01:1563-70.
- Edwards DJ, et al. Radiographic changes in the knee after meniscal transplantation. An experimental study in a sheep model. *The American journal of sports medicine* 1996;1996/03/01:222-6.
- Edwards PK, et al. Accelerated weightbearing rehabilitation after matrix-induced autologous chondrocyte implantation in the tibiofemoral joint: early clinical and radiological outcomes. *The American journal of sports medicine* 2013;2013/07/25:2314-24.
- Egloff C, et al. Biomechanics and pathomechanisms of osteoarthritis. *Swiss medical weekly* 2012;2012/07/21:w13583.
- Ehlinger M, et al. Reliability of locked plating in tibial plateau fractures with a medial component. *Orthopaedics & traumatology, surgery & research : OTSR* 2012;2012/02/22:173-9.
- Eitzen I, et al. Sagittal plane gait characteristics in hip osteoarthritis patients with mild to moderate symptoms compared to healthy controls: a cross-sectional study. *BMC musculoskeletal disorders* 2012;2012/12/22:258.
- El Amrani MH, et al. Patellar height relevance in opening-wedge high tibial osteotomy. *Orthopaedics & traumatology, surgery & research : OTSR* 2010;2010/02/23:37-43.
- Elahi S, et al. The association between varus-valgus alignment and patellofemoral osteoarthritis. *Arthritis and rheumatism* 2000;2000/08/16:1874-80.
- Elbaz A, et al. Can single limb support objectively assess the functional severity of knee osteoarthritis? *The Knee* 2012;2011/01/29:32-5.

- Emadedin M, et al. Intra-articular injection of autologous mesenchymal stem cells in six patients with knee osteoarthritis. Archives of Iranian medicine 2012;2012/06/26:422-8.
- Englund M, et al. Risk factors for symptomatic knee osteoarthritis fifteen to twenty-two years after meniscectomy. Arthritis and rheumatism 2004;2004/10/01:2811-9.
- Englund M. Meniscal tear--a feature of osteoarthritis. Acta orthopaedica Scandinavica Supplementum 2004;2004/06/11:1-45, backcover.
- Englund M. The role of biomechanics in the initiation and progression of OA of the knee. Best practice & research Clinical rheumatology 2010;2010/02/05:39-46.
- Erhart-Hledik JC, et al. A relationship between mechanically-induced changes in serum cartilage oligomeric matrix protein (COMP) and changes in cartilage thickness after 5 years. Osteoarthritis and cartilage / OARS, Osteoarthritis Research Society 2012;2012/08/08:1309-15.
- Erhart JC, et al. A variable-stiffness shoe lowers the knee adduction moment in subjects with symptoms of medial compartment knee osteoarthritis. Journal of biomechanics 2008;41:2720-5.
- Erhart JC, et al. Changes in knee adduction moment, pain, and functionality with a variable-stiffness walking shoe after 6 months. Journal of Orthopaedic Research 2010;28:873-9.
- Ersoz M, et al. Relationship between knee range of motion and Kellgren-Lawrence radiographic scores in knee osteoarthritis. American Journal of Physical Medicine and Rehabilitation 2003;82:110.
- Eser F, et al. Comparison of efficacy of hyaluronic acid and rofecoxib in the treatment of patients with Gonarthrosis. Turkiye Fiziksel Tip ve Rehabilitasyon Dergisi 2003;49:28-9.
- Eskelinen EV, et al. Canine total knee replacement performed due to osteoarthritis subsequent to distal femur fracture osteosynthesis. Two-year objective outcome. Veterinary and comparative orthopaedics and traumatology : V C O T 2012;2012/06/15:427-32.
- Esser S, et al. Effects of exercise and physical activity on knee osteoarthritis. Current Pain and Headache Reports 2011;15:423-30.
- Ettinger WH, Jr., et al. A randomized trial comparing aerobic exercise and resistance exercise with a health education program in older adults with knee osteoarthritis. The Fitness Arthritis and Seniors Trial (FAST). JAMA : the journal of the American Medical Association 1997;1997/01/01:25-31.
- Evcik D, et al. [Relationship between the mechanical and anatomic axis and orientation angles of the knee joint and functional capacity of patients with osteoarthritis]. Acta orthopaedica et traumatologica turcica 2006;2006/05/02:38-43.
- Falah M, et al. Treatment of articular cartilage lesions of the knee. International orthopaedics 2010;2010/02/18:621-30.
- Fantini Pagani CH, et al. The effect of valgus bracing on the knee adduction moment during gait and running in male subjects with varus alignment. Clinical Biomechanics 2010;25:70-6.
- Fantini Pagani CH, et al. Short-term effects of a dedicated knee orthosis on knee adduction moment, pain, and function in patients with osteoarthritis. Archives of physical medicine and rehabilitation 2010;91:1936-41.
- Fantini Pagani CH, et al. Influence of a valgus knee brace on muscle activation and co-contraction in patients with medial knee osteoarthritis. Journal of electromyography and kinesiology : official journal of the International Society of Electrophysiological Kinesiology 2013;2012/11/13:490-500.
- Farquhar S, et al. Frontal plane knee motion during stair climbing has implications for osteoarthritic progression in the nonoperated knee after unilateral total knee arthroplasty... 2010 Combined Sections Meeting (CSM), San Diego, California, February 17-20, 2010. Journal of Orthopaedic & Sports Physical Therapy 2010;40:A27.
- Farrokhi S, et al. Are the kinematics of the knee joint altered during the loading response phase of gait in individuals with concurrent knee osteoarthritis and complaints of joint instability? A dynamic stereo X-ray study. Clinical biomechanics (Bristol, Avon) 2012;2011/11/11:384-9.
- Farrokhi S, et al. A Biomechanical Perspective on Physical Therapy Management of Knee Osteoarthritis. J Orthop Sports Phys Ther 2013;43:600-19.
- Felson DT, et al. Osteophytes and progression of knee osteoarthritis. Rheumatology (Oxford, England) 2005;2004/09/24:100-4.
- Felson DT. Osteoarthritis of the knee. New England Journal of Medicine 2006;354:841-8.
- Felson DT, et al. Effect of recreational physical activities on the development of knee osteoarthritis in older adults of different weights: The Framingham study. Arthritis Care and Research 2007;57:6-12.
- Fisher NM. Muscle rehabilitation of patients with osteoarthritis of the knees. 1992. Eugene, Ore.; United States, Microform Publications, College of Human Development and Performance, University of Oregon.  
Ref Type: Generic
- Fitz W, et al. Does a modified gap-balancing technique result in medial-pivot knee kinematics in cruciate-retaining total knee arthroplasty? A pilot study. Clinical orthopaedics and related research 2012;2011/10/11:91-8.
- Fontbote RC, et al. [Rosenberg projection for the radiological diagnosis of knee osteoarthritis]. Revista medica de Chile 2008;2008/10/25:880-4.
- Foroughi N, et al. The association of external knee adduction moment with biomechanical variables in osteoarthritis: A systematic review. The Knee 2009;16:303-9.
- Foroughi N, et al. Progressive resistance training and dynamic alignment in osteoarthritis: A single-blind randomised controlled trial. Clinical Biomechanics 2011;26:71-7.
- Foucher KC, et al. Contralateral hip and knee gait biomechanics are unchanged by total hip replacement for unilateral hip osteoarthritis. Gait & posture 2012;35:61-5.

- Foucher KC, et al. Does hip implant positioning affect the peak external adduction moments of the healthy knees of subjects with total hip replacements? *J orthop res* 2013;31:1187-94.
- Frank W, et al. [The total x-ray-picture in the planning of correction-osteotomy-operations on legs (author's transl)]. *Zeitschrift fur Orthopadie und ihre Grenzgebiete* 1974;1974/04/01:344-7.
- Franz JR, et al. The Influence of arch supports on knee torques relevant to knee osteoarthritis. *Medicine and science in sports and exercise* 2008;40:913-7.
- Freedman Silvernail J, et al. The influence of body mass index and velocity on knee biomechanics during walking. *Gait & posture* 2013;37:575-9.
- Fregly BJ, et al. Design of patient-specific gait modifications for knee osteoarthritis rehabilitation. *IEEE Transactions on Biomedical Engineering* 2007;54:1687-95.
- Fregly BJ, et al. Evaluation of a patient-specific cost function to predict the influence of foot path on the knee adduction torque during gait. *Computer Methods in Biomechanics and Biomedical Engineering* 2008;11:63-71.
- Freiling D, et al. [The medial closed-wedge osteotomy of the distal femur for the treatment of unicompartmental lateral osteoarthritis of the knee]. *Operative Orthopadie und Traumatologie* 2010;2010/08/03:317-34.
- Frost-Christensen LN, et al. Degeneration, inflammation, regeneration, and pain/disability in dogs following destabilization or articular cartilage grooving of the stifle joint. *Osteoarthritis and Cartilage* 2008;16:1327-35.
- Fuchs S, et al. Proprioception with bicondylar sledge prostheses retaining cruciate ligaments. *Clinical orthopaedics and related research* 2003;148-54.
- Fujioka H, et al. Stress fracture of the fifth metatarsal bone as a late complication of total knee arthroplasty. *Kobe Journal of Medical Sciences* 2009;55:E93-E97.
- Fujita T, et al. Analgesic effect of etidronate on degenerative joint disease. *Journal of bone and mineral metabolism* 2001;2001/07/13:251-6.
- Fukagawa S, et al. Anterior border of the tibia as a landmark for extramedullary alignment guide in total knee arthroplasty for varus knees. *Journal of orthopaedic research : official publication of the Orthopaedic Research Society* 2011;2011/01/25:919-24.
- Furman BD, et al. Tibial post wear in posterior-stabilized knee replacements is design-dependent. *Clinical orthopaedics and related research* 2008;466:2650-5.
- Gaasbeek R, et al. The influence of open and closed high tibial osteotomy on dynamic patellar tracking: a biomechanical study. *Knee surgery, sports traumatology, arthroscopy : official journal of the ESSKA* 2007;2007/05/08:978-84.
- Gadeyne S, et al. [Results of self-centering patellofemoral prosthesis: a retrospective study of 57 implants]. *Revue de chirurgie orthopedique et reparatrice de l'appareil moteur* 2008;2008/05/06:228-40.
- Gajre SS, et al. Novel method of using dynamic electrical impedance signals for noninvasive diagnosis of knee osteoarthritis. *Conference proceedings : Annual International Conference of the IEEE Engineering in Medicine and Biology Society IEEE Engineering in Medicine and Biology Society Conference* 2006;2007/10/20:2207-10.
- Gajre SS, et al. Electrical impedance signal analysis in assessing the possibility of non-invasive diagnosis of knee osteoarthritis. *Journal of medical engineering & technology* 2007;2007/06/15:288-99.
- Gandhi R, et al. Bilateral non-union of high tibial osteotomies treated by total knee arthroplasty: a case report. *The Knee* 2008;2008/02/29:242-5.
- Gao B, et al. Three-dimensional joint kinematics of ACL-deficient and ACL-reconstructed knees during stair ascent and descent. *Human Movement Science* 2012;31:222-35.
- Gaudreault N, et al. Effects of physiotherapy treatment on knee osteoarthritis gait data using principal component analysis. *Clinical Biomechanics* 2011;26:284-91.
- Gebhard F, et al. [Computer-assisted knee surgery, what can we expect?]. *Zentralblatt fur Chirurgie* 2005;2005/08/17:321-6.
- Geenen R, et al. Psychological management of osteoarthritic pain. *Osteoarthritis and Cartilage* 2010;18:873-5.
- Gelber AC. Exercise and osteoarthritis: Not necessarily an all-or-nothing proposition! *Journal of Rheumatology* 2012;39:672-4.
- Georgoulis AD, et al. Three-dimensional tibiofemoral kinematics of the anterior cruciate ligament-deficient and reconstructed knee during walking. *American Journal of Sports Medicine* 2003;31:75-9.
- Gerus P, et al. Subject-specific knee joint geometry improves predictions of medial tibiofemoral contact forces. *Journal of biomechanics* 2013.
- Getgood A, et al. Short-term safety and efficacy of a novel high tibial osteotomy system: a case controlled study. *Knee surgery, sports traumatology, arthroscopy : official journal of the ESSKA* 2013;2011/10/19:260-9.
- Ghosh P, et al. The effects of intraarticular administration of hyaluronan in a model of early osteoarthritis in sheep. I. Gait analysis and radiological and morphological studies. *Seminars in arthritis and rheumatism* 1993;1993/06/01:18-30.
- Gil AB. The association between lower extremity movement patterns and physical function in people with knee osteoarthritis University of Pittsburgh; 2010.
- Gillam MH, et al. The progression of end-stage osteoarthritis: analysis of data from the Australian and Norwegian joint replacement registries using a multi-state model. *Osteoarthritis and cartilage / OARS, Osteoarthritis Research Society* 2013;2013/01/01:405-12.
- Gillette RL, et al. Recent developments in canine locomotor analysis: A review. *Veterinary Journal* 2008;178:165-76.
- Gillies RM, et al. Adaptive bone remodelling of all polyethylene unicompartmental tibial bearings. *ANZ journal of surgery* 2007;2007/02/14:69-72.

- Glimet T. Natural history of femorotibial osteoarthritis. *Annales de Radiologie* 1993;36:220-4.
- Godfrey JR. Toward optimal health: D. Casey Kerrigan, M.D., discusses the impact of footwear on the progression of osteoarthritis in women. *Journal of Women's Health* 2006;15:894-7.
- Goh JCH, et al. Gait analysis study on patients with varus osteoarthritis of the knee. *Clinical orthopaedics and related research* 1993;223-31.
- Gok H, et al. Kinetic and kinematic characteristics of gait in patients with medial knee arthrosis. *Acta Orthopaedica Scandinavica* 2002;73:647-52.
- Golightly YM, et al. A comprehensive review of the effectiveness of different exercise programs for patients with osteoarthritis. *The Physician and sportsmedicine* 2013;40:52-65.
- Gomes WF, et al. Effect of aerobic training on plasma cytokines and soluble receptors in elderly women with knee osteoarthritis, in response to acute exercise. *Clinical rheumatology* 2012;2012/01/05:759-66.
- Goossen A, et al. Automatic joint alignment measurements in pre- and post-operative long leg standing radiographs. *Methods of information in medicine* 2012;2012/10/06:406-14.
- Goradia VK, et al. Chronic lateral knee instability treated with a high tibial osteotomy. *Arthroscopy* 2002;18:807-11.
- Goutallier D, et al. [Effect of osseous torsions of the lower limb on the development of lateral femorotibial knee arthrosis]. *Revue de chirurgie orthopedique et reparatrice de l'appareil moteur* 1997;1997/01/01:613-21.
- Götze C, et al. Is there a need of custom-made prostheses for total hip arthroplasty? Gait analysis, clinical and radiographic analysis of customized femoral components. *Archives of orthopaedic and trauma surgery* 2009;129:267-74.
- Grauer JD, et al. Bilateral hip and knee arthroplasty. *The Journal of arthroplasty* 1986;1986/01/01:283-91.
- Greitemann B. Conservative therapy of osteoarthritis. Technical orthopedic fittings. *Zeitschrift für Rheumatologie* 2009;68:797-803.
- Griebel AJ, et al. Noninvasive dualMRI-based strains vary by depth and region in human osteoarthritic articular cartilage. *Osteoarthritis and cartilage / OARS, Osteoarthritis Research Society* 2013;2012/11/29:394-400.
- Griffin TM, et al. Why is obesity associated with osteoarthritis? Insights from mouse models of obesity. *Clinical orthopaedics and related research* 2008;45:387-98.
- Griffin TM, et al. Extreme obesity due to impaired leptin signaling in mice does not cause knee osteoarthritis. *Arthritis and rheumatism* 2009;2009/10/01:2935-44.
- Griffin TM, et al. Diet-induced obesity differentially regulates behavioral, biomechanical, and molecular risk factors for osteoarthritis in mice. *Arthritis research & therapy* 2010;2010/07/08:R130.
- Guccione AA, et al. Defining arthritis and measuring functional status in elders: methodological issues in the study of disease and physical disability. *American journal of public health* 1990;1990/08/01:945-9.
- Gudbergson H. MRI in knee osteoarthritis. Application in diet intervention. *Danish medical journal* 2013;2013/03/15:B4594.
- Guermazi M, et al. Arab translation and assessment of metric properties of the Lequesne index. *Annales de Readaptation et de Medecine Physique* 2004;47:195-203.
- Gulati A, et al. Localization of the full-thickness cartilage lesions in medial and lateral unicompartamental knee osteoarthritis. *Journal of orthopaedic research : official publication of the Orthopaedic Research Society* 2009;2009/04/28:1339-46.
- Gungen G, et al. The effect of mud pack therapy on serum YKL-40 and hsCRP levels in patients with knee osteoarthritis. *Rheumatology international* 2012;2011/01/25:1235-44.
- Guo M, et al. The influence of foot progression angle on the knee adduction moment during walking and stair climbing in pain free individuals with knee osteoarthritis. *Gait and Posture* 2007;26:436-41.
- Güven Z, et al. The effect of high voltage galvanic stimulation on quadriceps femoris muscle strength knee osteoarthritis. *Journal of Rheumatology and Medical Rehabilitation* 2003;14:72-9.
- Haim A, et al. Effect of center of pressure modulation on knee adduction moment in medial compartment knee osteoarthritis. *Journal of Orthopaedic Research* 2011;29:1668-74.
- Haladik JA, et al. Bracing improves clinical outcomes but does not affect the medial knee joint space in osteoarthritic patients during gait. *Knee surgery, sports traumatology, arthroscopy : official journal of the ESSKA* 2013;2013/07/13.
- Halder A, et al. Influence of limb alignment on mediolateral loading in total knee replacement: in vivo measurements in five patients. *Journal of Bone and Joint Surgery* 2012;94:1023-9.
- Hall M, et al. The effects of neuromuscular exercise on medial knee joint load post-arthroscopic partial medial meniscectomy: 'SCOPEX' a randomised control trial protocol. *BMC musculoskeletal disorders* 2012;13.
- Hamai S, et al. Three-dimensional knee joint kinematics during golf swing and stationary cycling after total knee arthroplasty. *Journal of orthopaedic research : official publication of the Orthopaedic Research Society* 2008;2008/06/05:1556-61.
- Hamai S, et al. Knee kinematics in medial osteoarthritis during in vivo weight-bearing activities. *Journal of orthopaedic research : official publication of the Orthopaedic Research Society* 2009;2009/06/09:1555-61.
- Hamerman D. Osteoarthritis. *Orthopaedic review* 1988;1988/04/01:353-60.
- Han CD, et al. Femoral component fracture due to osteolysis after cemented mobile-bearing total knee arthroplasty. *The Journal of arthroplasty* 2009;2008/06/07:323.

- Hanratty BM, et al. The influence of posterior condylar offset on knee flexion after total knee replacement using a cruciate-sacrificing mobile-bearing implant. *The Journal of bone and joint surgery British volume* 2007;2007/08/04:915-8.
- Hansen P, et al. Does Running Cause Osteoarthritis in the Hip or Knee? *PM and R* 2012;4:S117-S121.
- Hanson GR, et al. In vivo anterior tibial post contact after posterior stabilizing total knee arthroplasty. *Journal of orthopaedic research : official publication of the Orthopaedic Research Society* 2007;2007/06/09:1447-53.
- Harato K, et al. Extension Limitation in Standing Affects Weight-Bearing Asymmetry After Unilateral Total Knee Arthroplasty. *Journal of Arthroplasty* 2010;25:225-9.
- Harato K, et al. Asymmetry of the knee extension deficit in standing affects weight-bearing distribution in patients with bilateral end-stage knee osteoarthritis. *Knee surgery, sports traumatology, arthroscopy : official journal of the ESSKA* 2013;2013/02/12.
- Harding GT, et al. Body mass index affects knee joint mechanics during gait differently with and without moderate knee osteoarthritis. *Osteoarthritis and Cartilage* 2012;20:1234-42.
- Hare KB, et al. Arthroscopic partial meniscectomy in middle-aged patients with mild or no knee osteoarthritis: a protocol for a double-blind, randomized sham-controlled multi-centre trial. *BMC musculoskeletal disorders* 2013;2013/02/28:71.
- Harrington MA, et al. Fixed- vs mobile-bearing total knee arthroplasty: does it make a difference?--a prospective randomized study. *The Journal of arthroplasty* 2009;2009/06/26:24-7.
- Harrison MM, et al. Patterns of knee arthrosis and patellar subluxation. *Clinical orthopaedics and related research* 1994;1994/12/01:56-63.
- Hart JM, et al. Multiple ligament knee reconstruction clinical follow-up and gait analysis. *Knee surgery, sports traumatology, arthroscopy : official journal of the ESSKA* 2009;2008/12/25:277-85.
- Hart R, et al. Comparison of long-term clinical and radiological results after meniscectomies. *Acta chirurgiae orthopaedicae et traumatologiae Cechoslovaca* 2005;72:304-7.
- Hart R, et al. Minimally invasive and navigated implantation for total knee arthroplasty. X-ray analysis and early clinical results. *Orthopade* 2006;35:552-7.
- Hashemi J, et al. The geometry of the tibial plateau and its influence on the biomechanics of the tibiofemoral joint. *Journal of Bone and Joint Surgery* 2008;90:2724-34.
- Hawkins A, et al. Meniscectomy and arthritis. *CME Orthopaedics* 2001;2:51-6.
- Hayes KW, et al. Observation of varus thrust during gait as a test to predict progression of medial tibiofemoral osteoarthritis. (Abstract). *Journal of orthopaedic and sports physical therapy* 2004;34:A10.
- Hazaki S, et al. A radiographic analysis of anterior-posterior translation in total knee arthroplasty. *Journal of orthopaedic science : official journal of the Japanese Orthopaedic Association* 2001;2002/02/15:390-6.
- Hedlund R. Pedicle subtraction osteotomy in flat back syndrome 38 years after Harrington instrumentation for AIS. *European Spine Journal* 2012;21:563-5.
- Heep H, et al. Osteoarthritis of leptin-deficient ob/ob mice in response to biomechanical loading in micro-CT. *International journal of biological sciences* 2009;2009/04/04:265-75.
- Heesterbeek P. Mind the gaps! *Acta orthopaedica* 2011;82:1-26.
- Hefzy MS, et al. Kinematics of the knee joint in deep flexion: a radiographic assessment. *Medical engineering & physics* 1998;1998/09/05:302-7.
- Heiden TL, et al. Knee joint kinematics, kinetics and muscle co-contraction in knee osteoarthritis patient gait. *Clinical biomechanics (Bristol, Avon)* 2009;2009/09/22:833-41.
- Hendren L, et al. A review of the differences between normal and osteoarthritis articular cartilage in human knee and ankle joints. *Foot (Edinburgh, Scotland)* 2009;2010/03/24:171-6.
- Henriksen M, et al. Impulse-forces during walking are not increased in patients with knee osteoarthritis. *Acta orthopaedica* 2006;77:650-6.
- Henriksen M, et al. Gait changes in patients with knee osteoarthritis are replicated by experimental knee pain. *Arthritis care & research* 2010;2010/04/15:501-9.
- Henriksen M, et al. The relationship between pain and dynamic knee joint loading in knee osteoarthritis varies with radiographic disease severity. A cross sectional study. *The Knee* 2012;2011/08/16:392-8.
- Henriksen M, et al. Is increased joint loading detrimental to obese patients with knee osteoarthritis? A secondary data analysis from a randomized trial. *Osteoarthritis and cartilage / OARS, Osteoarthritis Research Society* 2013;2013/10/19.
- Hernborg JS, et al. The natural course of untreated osteoarthritis of the knee. *Clinical orthopaedics and related research* 1977;1977/03/01:130-7.
- Hernigou P, et al. Posterior slope of the tibial implant and the outcome of unicompartmental knee arthroplasty. *The Journal of bone and joint surgery American volume* 2004;2004/03/05:506-11.
- Hertel P, et al. ACL reconstruction using bone-patellar tendon-bone press-fit fixation: 10-year clinical results. *Knee surgery, sports traumatology, arthroscopy : official journal of the ESSKA* 2005;2005/02/04:248-55.
- Hilding MB, et al. A relationship between dynamic and static assessments of knee joint load. Gait analysis and radiography before and after knee replacement in 45 patients. *Acta Orthopaedica Scandinavica* 1995;66:317-20.
- Hill BW, et al. Paradoxical cerebral embolism after total knee arthroplasty. *Orthopedics* 2012;35:e1659-e1663.

- Hillstrom HJ, et al. Lower extremity conservative realignment therapies for knee osteoarthritis. *Physical medicine and rehabilitation* 2002;16:507-20.
- Hinman R, Bennell K. Insoles and footwear in the management of knee osteoarthritis. Bentham Science Publishers Ltd.; 2012. p. 103-14.
- Hinman RS, et al. Delayed onset of quadriceps activity and altered knee joint kinematics during stair stepping in individuals with knee osteoarthritis. *Archives of physical medicine and rehabilitation* 2002;83:1080-6.
- Hinman RS, et al. Patellofemoral joint osteoarthritis: an important subgroup of knee osteoarthritis. *Rheumatology (Oxford, England)* 2007;2007/05/15:1057-62.
- Hinman RS, et al. Lateral wedges in knee osteoarthritis: what are their immediate clinical and biomechanical effects and can these predict a three-month clinical outcome? *Arthritis and rheumatism* 2008;2008/03/04:408-15.
- Hinman RS, et al. Advances in insoles and shoes for knee osteoarthritis. *Current opinion in rheumatology* 2009;2009/04/03:164-70.
- Hinrichs T, et al. Recessive multiple epiphyseal dysplasia (rMED) with homozygosity for C653S mutation in the DTDST gene - Phenotype, molecular diagnosis and surgical treatment of habitual dislocation of multilayered patella: Case report. *BMC musculoskeletal disorders* 2010;11.
- Hinterwimmer S, et al. Patella kinematics and patello-femoral contact areas in patients with genu varum and mild osteoarthritis. *Clinical Biomechanics* 2004;19:704.
- Hirschmann MT, et al. Anterolateral approach with tibial tubercle osteotomy versus standard medial approach for primary total knee arthroplasty: Does it matter? *BMC musculoskeletal disorders* 2010;11.
- Hirschmann MT, et al. Assessment of loading history of compartments in the knee using bone SPECT/CT: a study combining alignment and <sup>99m</sup>Tc-HDP tracer uptake/distribution patterns. *Journal of orthopaedic research : official publication of the Orthopaedic Research Society* 2013;2012/08/14:268-74.
- Ho C, et al. Magnetic resonance imaging in assessing cartilage changes in experimental osteoarthrosis of the knee. *Investigative radiology* 1992;1992/01/01:84-90.
- Hochberg MC, et al. Potential effects of chondroitin sulfate on joint swelling: a GAIT report. *Osteoarthritis and Cartilage* 2008;16:S22-S24.
- Hoffmeister E. Distraction Arthroplasty Technique Promising for Treating Knee Osteoarthritis. *Lippincott's Bone and Joint Newsletter* 2011;17:121-3.
- Hohmann E, et al. MR imaging of the hip and knee before and after marathon running. *The American journal of sports medicine* 2004;2004/02/03:55-9.
- Holla JF, et al. Diagnostic accuracy of range of motion measurements in early symptomatic hip and/or knee osteoarthritis. *Arthritis care & research* 2012;2011/09/29:59-65.
- Hollinghurst D, et al. In vivo sagittal plane kinematics of the Avon patellofemoral arthroplasty. *The Journal of arthroplasty* 2007;2007/01/02:117-23.
- Holten KB. How should we diagnose and treat osteoarthritis of the knee? *Journal of Family Practice* 2004;53:134-6.
- Holzmüller W, et al. [Mechanical properties of PDS-augmented patellar tendon transplants in reconstruction of the anterior cruciate ligament]. *Der Unfallchirurg* 1992;1992/06/01:306-10.
- Hood RW, et al. The correction of knee alignment in 225 consecutive total condylar knee replacements. *Clinical orthopaedics and related research* 1981;1981/10/01:94-105.
- Horiuchi H, et al. In vivo kinematic analysis of cruciate-retaining total knee arthroplasty during weight-bearing and non-weight-bearing deep knee bending. *The Journal of arthroplasty* 2012;2012/04/06:1196-202.
- Hortobagyi T, et al. Altered hamstring-quadriceps muscle balance in patients with knee osteoarthritis. *Clinical biomechanics (Bristol, Avon)* 2005;2004/11/30:97-104.
- Horton WE, Jr., et al. An association between an aggrecan polymorphic allele and bilateral hand osteoarthritis in elderly white men: data from the Baltimore Longitudinal Study of Aging (BLSA). *Osteoarthritis and cartilage / OARS, Osteoarthritis Research Society* 1998;1999/01/07:245-51.
- Hosalkar HS, et al. Outcomes of total joint arthroplasties in adults with post-polio syndrome: Results from a tertiary neuro-orthopaedic center. *Current Orthopaedic Practice* 2010;21:273-81.
- Hoshino Y, et al. Internal tibial rotation during in vivo, dynamic activity induces greater sliding of tibio-femoral joint contact on the medial compartment. *Knee surgery, sports traumatology, arthroscopy : official journal of the ESSKA* 2012;2011/11/02:1268-75.
- Howell SM, et al. Assessment of the radii of the medial and lateral femoral condyles in varus and valgus knees with osteoarthritis. *The Journal of bone and joint surgery American volume* 2010;2010/01/06:98-104.
- Hsieh RL, et al. Short-term effects of 890-nanometer radiation on pain, physical activity, and postural stability in patients with knee osteoarthritis: a double-blind, randomized, placebo-controlled study. *Archives of physical medicine and rehabilitation* 2012;2012/03/31:757-64.
- Hsu RW, et al. Hybrid total knee arthroplasty: a 3- to 6-year outcome analysis. *Journal of the Formosan Medical Association = Taiwan yi zhi* 1998;1998/07/03:410-5.
- Hu DY, et al. Jingsu glucosamine hydrochloride functional food for improving knee joint function in patients with knee osteoarthritis: A human intake trial. *Chinese Journal of Clinical Rehabilitation* 2005;9:8-9.
- Hu YZ, et al. [Application of orientation to the mechanical alignment of lower limbs in operation of high tibial osteotomy]. *Zhongguo gu shang = China journal of orthopaedics and traumatology* 2012;2012/12/22:751-4.

- Huang MH, et al. A comparison of various therapeutic exercises on the functional status of patients with knee osteoarthritis. *Seminars in arthritis and rheumatism* 2003;32:398-406.
- Huang MH, et al. Use of ultrasound to increase effectiveness of isokinetic exercise for knee osteoarthritis. *Archives of physical medicine and rehabilitation* 2005;86:1545-51.
- Hubley-Kozey CL, et al. Neuromuscular alterations during walking in persons with moderate knee osteoarthritis. *Journal of electromyography and kinesiology : official journal of the International Society of Electrophysiological Kinesiology* 2006;2005/10/11:365-78.
- Hubley-Kozey CL, et al. Co-activation differences in lower limb muscles between asymptomatic controls and those with varying degrees of knee osteoarthritis during walking [corrected] [published erratum appears in *CLIN BIOMECH* 2009 Jul;24(6):529]. *Clinical Biomechanics* 2009;24:407-14.
- Hudson D, et al. Bone mineral density of the proximal tibia relates to axial torsion in the lower limb. *Gait and Posture* 2007;26:446-51.
- Hulet C, et al. [Functional gait adaptations in patients with painful hip]. *Revue de chirurgie orthopedique et reparatrice de l'appareil moteur* 2000;2000/11/04:581-9.
- Hulet C, et al. [Dual x-ray absorptiometry assessment of bone density of the proximal tibia in advanced-stage degenerative disease of the knee]. *Revue de chirurgie orthopedique et reparatrice de l'appareil moteur* 2001;2001/03/10:50-60.
- Hunt MA. Measures of static and dynamic alignment in individuals with osteoarthritis of the knee University of Western Ontario (Canada); 2007.
- Hunt MA, et al. Towards a biopsychosocial framework of osteoarthritis of the knee. *Disability and rehabilitation* 2008;2007/09/14:54-61.
- Hunt MA, et al. Measures of frontal plane lower limb alignment obtained from static radiographs and dynamic gait analysis. *Gait & posture* 2008;2007/10/20:635-40.
- Hunt MA, et al. Lateral trunk lean explains variation in dynamic knee joint load in patients with medial compartment knee osteoarthritis. *Osteoarthritis and cartilage / OARS, Osteoarthritis Research Society* 2008;2008/01/22:591-9.
- Hunt MA, et al. Individuals with severe knee osteoarthritis (OA) exhibit altered proximal walking mechanics compared with individuals with less severe OA and those without knee pain. *Arthritis care & research* 2010;2010/05/28:1426-32.
- Hunt MA, et al. Predictors of single-leg standing balance in individuals with medial knee osteoarthritis. *Arthritis care & research* 2010;2010/04/15:496-500.
- Hunt MA, et al. Quadriceps strength is not related to gait impact loading in knee osteoarthritis. *The Knee* 2010;2010/03/23:296-302.
- Hunt MA, et al. Varus thrust in medial knee osteoarthritis: Quantification and effects of different gait-related interventions using a single case study. *Arthritis Care and Research* 2011;63:293-7.
- Hunt MA, et al. Predicting dynamic knee joint load with clinical measures in people with medial knee osteoarthritis. *The Knee* 2011;2010/08/31:231-4.
- Hunt MA, et al. Relationships amongst osteoarthritis biomarkers, dynamic knee joint load, and exercise: results from a randomized controlled pilot study. *BMC musculoskeletal disorders* 2013;2013/03/28:115.
- Hunt MA, et al. A physiotherapist-delivered, combined exercise and pain coping skills training intervention for individuals with knee osteoarthritis: a pilot study. *The Knee* 2013;2012/08/28:106-12.
- Hunt MA, et al. Foot rotational effects on radiographic measures of lower limb alignment. *Canadian Journal of Surgery* 2006;49:6.
- Hunter DJ, et al. The Management of Osteoarthritis: An Overview and Call to Appropriate Conservative Treatment. *Rheumatic Disease Clinics of North America* 2008;34:689-712.
- Hunter DJ, et al. Imaging the Role of Biomechanics in Osteoarthritis. *Rheumatic Disease Clinics of North America* 2009;35:465-83.
- Hunter DJ, et al. Role of alignment and biomechanics in osteoarthritis and implications for imaging. *Radiologic clinics of North America* 2009;2009/07/28:553-66.
- Hunter DJ, et al. Alignment and osteoarthritis of the knee. *The Journal of bone and joint surgery American volume* 2009;2009/02/21:85-9.
- Hunter DJ, et al. Structural correlates of pain in joints with osteoarthritis. *Osteoarthritis and Cartilage* 2013;21:1170-8.
- Hunter D. Biomechanical Mechanisms in OA Pathogenesis. *Seminars in arthritis and rheumatism* 2011;41:91.
- Hurley MV. The role of muscle weakness in the pathogenesis of osteoarthritis. *Rheumatic Disease Clinics of North America* 1999;25:283-98.
- Hurwitz DE, et al. Effect of knee pain on joint loading in patients with osteoarthritis. *Current opinion in rheumatology* 1999;1999/09/30:422-6.
- Hurwitz DE, et al. Knee pain and joint loading in subjects with osteoarthritis of the knee. *Journal of orthopaedic research : official publication of the Orthopaedic Research Society* 2000;2000/10/29:572-9.
- Hurwitz DE, et al. The knee adduction moment during gait in subjects with knee osteoarthritis is more closely correlated with static alignment than radiographic disease severity, toe out angle and pain. *Journal of orthopaedic research : official publication of the Orthopaedic Research Society* 2002;2002/02/21:101-7.
- Huskisson EC, et al. Hyaluronic acid improved walking ability and short term knee function in osteoarthritis of the knee: Commentary. *Evidence-Based Medicine* 2000;5:73.
- Hwang J, et al. Increased hydraulic conductance of human articular cartilage and subchondral bone plate with progression of osteoarthritis. *Arthritis and rheumatism* 2008;2008/11/28:3831-42.
- Ickinger C, et al. Current approach to diagnosis and management of osteoarthritis. *South African Family Practice* 2010;52:382-90.
- Inaba Y, et al. Provoked anterior knee pain in medial osteoarthritis of the knee. *The Knee* 2003;2003/11/25:351-5.

- Iorio R, et al. Unicompartmental arthritis of the knee. *Journal of Bone and Joint Surgery - Series A* 2003;85:1351-64.
- Ip S, et al. Frequency of bone marrow lesions and association with pain severity: results from a population-based symptomatic knee cohort. *The Journal of rheumatology* 2011;2011/03/03:1079-85.
- Ishida K, et al. In vivo comparisons of patellofemoral kinematics before and after ADVANCE Medial-Pivot total knee arthroplasty. *International orthopaedics* 2012;2012/08/14:2073-7.
- Ishii Y, et al. Extramedullary versus intramedullary alignment guides in total knee arthroplasty. *Clinical orthopaedics and related research* 1995;1995/09/01:167-75.
- Ishii Y, et al. Gait analysis after total knee arthroplasty. Comparison of posterior cruciate retention and substitution. *Journal of Orthopaedic Science* 1998;3:310-7.
- Ishii Y, et al. Changes in lower extremity 3-dimensional load-bearing axes before and after mobile-bearing total knee arthroplasty. *The Journal of arthroplasty* 2012;2012/02/07:1203-9.
- Ishii Y, et al. Posterior condylar offset does not correlate with knee flexion after TKA. *Clinical orthopaedics and related research* 2013;2013/04/24:2995-3001.
- Issack PS, et al. Failure at the taper lock of a modular stemmed femoral implant in revision knee arthroplasty: A report of two cases and a retrieval analysis. *Journal of Bone and Joint Surgery - Series A* 2007;89:2271-4.
- Iversen MD. Rehabilitation Interventions for Pain and Disability in Osteoarthritis: A review of interventions including exercise, manual techniques, and assistive devices... Reprinted with permission from *American Journal of Nursing*, 112(3), S32-S37, 2012. *Orthopaedic Nursing* 2012;31:103-8.
- Izumi M, et al. MR-guided focused ultrasound for the novel and innovative management of osteoarthritic knee pain. *BMC musculoskeletal disorders* 2013;14.
- Jackson BD, et al. The effect of the knee adduction moment on tibial cartilage volume and bone size in healthy women. *Rheumatology (Oxford, England)* 2004;2003/12/18:311-4.
- Jaeger S, et al. The influence of the femoral force application point on tibial cementing pressure in cemented UKA: an experimental study. *Archives of orthopaedic and trauma surgery* 2012;2012/07/14:1589-94.
- Jakob RP, et al. [Closing wedge osteotomy of the tibial head in treatment of single compartment arthrosis]. *Der Orthopäde* 2004;2004/02/12:143-52.
- Jan MH, et al. Effects of Weight-Bearing Versus Nonweight-Bearing Exercise on Function, Walking Speed, and Position Sense in Participants With Knee Osteoarthritis: A Randomized Controlled Trial. *Archives of physical medicine and rehabilitation* 2009;90:897-904.
- Jani L, et al. Experiences with MacIntosh hemiarthroplasty of the knee joint. *Archiv für Orthopädische und Unfall-Chirurgie* 1973;75:81-96.
- Jay GD, et al. Prevention of cartilage degeneration and gait asymmetry by lubricin tribosupplementation in the rat following anterior cruciate ligament transection. *Arthritis and rheumatism* 2012;64:1162-71.
- Jean JL, et al. Stress fracture of the proximal tibia after total knee arthroplasty: A case report. *Journal of the Formosan Medical Association* 2001;100:561-4.
- Jepsen KJ, et al. A syndrome of joint laxity and impaired tendon integrity in lumican- and fibromodulin-deficient mice. *Journal of Biological Chemistry* 2002;277:35532-40.
- Jezussek D, et al. Clinical picture and diagnosis of knee osteoarthritis. *MMW-Fortschritte der Medizin* 2007;149:28-30.
- Jezussek D, et al. [Manifestations and diagnosis of hip osteoarthritis]. *MMW Fortschritte der Medizin* 2007;2007/10/09:29-31.
- Jones J, et al. A case of a sural neuroma as a cause of lateral ankle pain. *Foot* 2012;22:138-40.
- Jones RK, et al. A comparison of the biomechanical effects of valgus knee braces and lateral wedged insoles in patients with knee osteoarthritis. *Gait & posture* 2013;37:368-72.
- Jones RK, et al. A new approach to prevention of knee osteoarthritis: reducing medial load in the contralateral knee. *The Journal of rheumatology* 2013;2013/01/17:309-15.
- Jordan JM, et al. The impact of arthritis in rural populations. *Arthritis Care and Research* 1995;8:242-50.
- Joseph RM. Osteoarthritis of the ankle: bridging concepts in basic science with clinical care. *Clinics in podiatric medicine and surgery* 2009;2009/04/25:169-84.
- Judkins TR, et al. Femoral neck fracture during physical therapy following surface replacement arthroplasty: A preventable complication? A case report. *Patient Safety in Surgery* 2010;4.
- Jung HJ, et al. Fractures associated with computer-navigated total knee arthroplasty: A report of two cases. *Journal of Bone and Joint Surgery - Series A* 2007;89:2280-4.
- Jung KA, et al. Fracture of a second-generation highly cross-linked UHMWPE tibial post in a posterior-stabilized scorpion knee system. *Orthopedics* 2008;31:1137.
- Jüni P, et al. Osteoarthritis: rational approach to treating the individual. *Best Practice and Research: Clinical Rheumatology* 2006;20:721-40.
- Kacar C, et al. The prevalence of symptomatic knee and distal interphalangeal joint osteoarthritis in the urban population of Antalya, Turkey. *Rheumatology international* 2005;2003/12/09:201-4.
- Kaczmarczyk J, et al. Opening-wedge high tibial osteotomy to treat osteoarthritis of the knee with use of OSTEO+ system--initial report. *Chirurgia narządów ruchu i ortopedia polska* 2004;69:97-9.

- Kaczmarczyk J, et al. Walking ability after treatment of the knee osteoarthritis with OSTEO+ system. *Chirurgia narządów ruchu i ortopedia polska* 2006;71:427-9.
- Kapadia RD, et al. Meniscal ossification in spontaneous osteoarthritis in the guinea-pig. *Osteoarthritis and cartilage / OARS, Osteoarthritis Research Society* 2000;2000/09/01:374-7.
- Karagülle M, et al. A 10-day course of SPA therapy is beneficial for people with severe knee osteoarthritis. *Clinical rheumatology* 2007;26:2063-71.
- Karamanidis K, et al. Altered control strategy between leading and trailing leg increases knee adduction moment in the elderly while descending stairs. *Journal of biomechanics* 2011;44:706-11.
- Karan A, et al. Intraarticular Na-hyaluronate (Orthovisc) injection in knee osteoarthritis: Comparison of different injection techniques and short term efficacy. *Agri* 2000;12:31-5.
- Kashyap SN, et al. Clinical experience with less invasive surgery techniques in total knee arthroplasty: A comparative study. *Knee Surgery, Sports Traumatology, Arthroscopy* 2008;16:544-8.
- Katz JN, et al. Associations among preoperative MRI features and functional status following arthroscopic partial meniscectomy. *Osteoarthritis and Cartilage* 2006;14:418-22.
- Kauppila AM, et al. Disability in end-stage knee osteoarthritis. *Disability and rehabilitation* 2009;31:370-80.
- Kawakami H, et al. Gait analysis system for assessment of dynamic loading axis of the knee. *Gait and Posture* 2005;21:125-30.
- Kawano T, et al. Factors affecting patellar tracking after total knee arthroplasty. *The Journal of arthroplasty* 2002;2002/10/11:942-7.
- Kean CO, et al. Comparison of peak knee adduction moment and knee adduction moment impulse in distinguishing between severities of knee osteoarthritis. *Clinical biomechanics (Bristol, Avon)* 2012;2012/01/17:520-3.
- Keene GCR, et al. Mini-symposium: surgery for knee arthritis. (iii) Modern unicompartmental knee replacement. *Current Orthopaedics* 2005;19:428-45.
- Kemp G, et al. Reducing joint loading in medial knee osteoarthritis: shoes and canes. *Arthritis and rheumatism* 2008;2008/04/29:609-14.
- Kerrigan DC, et al. Knee joint torques: A comparison between women and men during barefoot walking. *Archives of physical medicine and rehabilitation* 2000;81:1162-5.
- Kerrigan DC, et al. Effectiveness of a lateral-wedge insole on knee varus torque in patients with knee osteoarthritis. *Archives of physical medicine and rehabilitation* 2002;2002/07/05:889-93.
- Kerrigan DC, et al. Men's shoes and knee joint torques relevant to the development and progression of knee osteoarthritis. *The Journal of rheumatology* 2003;2003/03/01:529-33.
- Kerrigan DC, et al. Moderate-heeled shoes and knee joint torques relevant to the development and progression of knee osteoarthritis. *Archives of physical medicine and rehabilitation* 2005;86:871-5.
- Kharwadkar N, et al. 5 degrees to 6 degrees of distal femoral cut for uncomplicated primary total knee arthroplasty: is it safe? *The Knee* 2006;2005/08/30:57-60.
- Kienapfel H, et al. [2- to 5-year follow-up of cementless implantable knee joint prosthesis of the Miller-Galante type]. *Der Orthopäde* 1991;1991/06/01:189-96.
- Kim I, et al. Tibiofemoral osteoarthritis affects quality of life and function in elderly Koreans, with women more adversely affected than men. *BMC musculoskeletal disorders* 2010;11.
- Kim SJ, et al. Medial opening wedge high-tibial osteotomy using a kinematic navigation system versus a conventional method: a 1-year retrospective, comparative study. *Knee surgery, sports traumatology, arthroscopy : official journal of the ESSKA* 2009;2008/10/14:128-34.
- Kim YH, et al. Alignment and orientation of the components in total knee replacement with and without navigation support. *Journal of Bone and Joint Surgery - Series B* 2007;89:471-6.
- Kimmattkar N, et al. Efficacy and tolerability of Boswellia serrata extract in treatment of osteoarthritis of knee - A randomized double blind placebo controlled trial. *Phytomedicine* 2003;10:3-7.
- King LK, et al. Resistance training for medial compartment knee osteoarthritis and malalignment. *Medicine and science in sports and exercise* 2008;2008/07/11:1376-84.
- Kitagawa A, et al. In vivo comparison of knee kinematics before and after high-flexion posterior cruciate-retaining total knee arthroplasty. *The Journal of arthroplasty* 2010;2009/09/05:964-9.
- Klatt BA, et al. Treatment options in knee osteoarthritis: Total knee arthroplasty versus platelet-rich plasma. *PM and R* 2011;3:377-86.
- Kleinert B, et al. Results of proximal tibia osteotomy. *Orthopäde* 1985;14:154-60.
- Knoop J, et al. Association of lower muscle strength with self-reported knee instability in osteoarthritis of the knee: Results from the Amsterdam Osteoarthritis Cohort. *Arthritis care & research* 2012;64:38-45.
- Knoop J, et al. Biomechanical factors and physical examination findings in osteoarthritis of the knee: associations with tissue abnormalities assessed by conventional radiography and high resolution 3.0 Tesla magnetic resonance imaging. *Arthritis research & therapy* 2012;2012/10/09:R212.
- Ko FC, et al. In vivo cyclic compression causes cartilage degeneration and subchondral bone changes in mouse tibiae. *Arthritis and rheumatism* 2013;2013/02/26:1569-78.

- Kobayashi H, et al. Spontaneous dislocation of a mobile-bearing polyethylene insert after posterior-stabilized rotating platform total knee arthroplasty: A case report. *The Knee* 2011;18:496-8.
- Koca NT, et al. Our patients with knee osteoarthritis risk factors and relationship with osteoarthritis-osteoporosis. *Turk Osteoporoz Dergisi* 2011;17:14-20.
- Koeck FX, et al. Removal and successful re-implantation of a customized interpositional knee device following an early postoperative infection: A case report. *Central European Journal of Medicine* 2010;5:442-6.
- Kohl S, et al. Anterior crucial ligament rupture: self-healing through dynamic intraligamentary stabilization technique. *Knee surgery, sports traumatology, arthroscopy : official journal of the ESSKA* 2013;21:599-605.
- Konradsen L, et al. Long distance running and osteoarthritis. *The American journal of sports medicine* 1990;1990/07/01:379-81.
- Koo S, et al. Considerations in measuring cartilage thickness using MRI: Factors influencing reproducibility and accuracy. *Osteoarthritis and Cartilage* 2005;13:782-9.
- Koo S, et al. Knee joint kinematics during walking influences the spatial cartilage thickness distribution in the knee. *Journal of biomechanics* 2011;44:1405-9.
- Kornaropoulos EI, et al. Frontal plane alignment: An imageless method to predict the mechanical femoral-tibial angle (mFTA) based on functional determination of joint centres and axes. *Gait and Posture* 2010;31:204-8.
- Koshino T. Etiology, classifications and clinical findings of osteoarthritis of the knee. *Ryumachi* 1985;25:191-203.
- Koshino T, et al. Grading system of articular cartilage degeneration in osteoarthritis of the knee. *Bulletin: Hospital for Joint Diseases* 1993;53:41-6.
- Koshino T, et al. Medial opening-wedge high tibial osteotomy with use of porous hydroxyapatite to treat medial compartment osteoarthritis of the knee. *Journal of Bone and Joint Surgery - Series A* 2003;85:78-85.
- Kovar PA, et al. Supervised fitness walking in patients with osteoarthritis of the knee: A randomized, controlled trial. *Annals of Internal Medicine* 1992;116:529-34.
- Kozlowski K, et al. Hereditary dysplasia epiphysealis multiplex. *Clinical Radiology* 1967;18:330-6.
- Krackow KA, et al. Torsion deformity and joint loading for medial knee osteoarthritis. *Gait & posture* 2011;2011/03/29:625-9.
- Kramer DE, et al. Juvenile Osteochondritis Dissecans of the Knee. *Operative Techniques in Sports Medicine* 2008;16:70-6.
- Kraus VB, et al. A comparative assessment of alignment angle of the knee by radiographic and physical examination methods. *Arthritis and rheumatism* 2005;2005/06/04:1730-5.
- Krause F, et al. [Medium-term results after m. vastus medialis obliquus-plasty for lateral patellar dislocation]. *Der Orthopade* 2006;2005/09/30:94-101.
- Krauss I, et al. Efficacy of conservative treatment regimes for hip osteoarthritis - Evaluation of the therapeutic exercise regime "hip School": A protocol for a randomised, controlled trial. *BMC musculoskeletal disorders* 2011;12.
- Kreuz PC, et al. Repair of focal cartilage defects with scaffold-assisted autologous chondrocyte grafts: clinical and biomechanical results 48 months after transplantation. *The American journal of sports medicine* 2011;2011/05/05:1697-705.
- Krohn K. Footwear alterations and bracing as treatments for knee osteoarthritis. *Current opinion in rheumatology* 2005;2005/08/12:653-6.
- Król R, et al. Operative tactics and results of treatment of patients with coxarthrosis secondary to congenital high luxation of hip joints. *Ortopedia Traumatologia Rehabilitacja* 2007;9:604-11.
- Kröner AH, et al. Influence of high tibial osteotomy on bone marrow edema in the knee. *Clinical orthopaedics and related research* 2007;454:155-62.
- Kubesj R, et al. Results of the first trial of the implantation of cemented prosthesis, type beznoska/S.V.L., in total knee arthroplasty. *Acta chirurgiae orthopaedicae et traumatologiae Cechoslovaca* 2003;70:39-46.
- Kubinski AJ, et al. Strategies used during a challenging weighted walking task in healthy adults and individuals with knee osteoarthritis. *Gait & posture* 2012;2011/10/04:6-10.
- Kubovy P, et al. Influence of SYSADOA group chemicals on progression of human knee joint osteoarthritis: new objective evaluation method - measuring of rheological properties in vivo. *Neuro endocrinology letters* 2012;2012/11/20:651-9.
- Kullich W, et al. One-year-survey with multicenter data of more than 4,500 patients with degenerative rheumatic diseases treated with therapeutic nuclear magnetic resonance. *J Back Musculoskelet Rehabil* 2013;26:93-104.
- Kumagai K, et al. Sodium pentosan polysulfate resulted in cartilage improvement in knee osteoarthritis--an open clinical trial. *BMC clinical pharmacology* 2010;2010/03/30:7.
- Kumagi M, et al. Total knee replacement for osteoarthritis of the knee with congenital dislocation of the patella. *Journal of Bone & Joint Surgery, British Volume* 2007;89B:1522-4.
- Kumar D, et al. EMG-driven modeling approach to muscle force and joint load estimations: Case study in knee osteoarthritis. *Journal of Orthopaedic Research* 12 A.D. Feb.
- Kuptniratsaikul V, et al. The efficacy of a muscle exercise program to improve functional performance of the knee in patients with osteoarthritis. *Journal of the Medical Association of Thailand = Chotmaihet thangphaet* 2002;2002/06/22:33-40.
- Kuptniratsaikul V, et al. The epidemiology of osteoarthritis of the knee in elderly patients living an urban area of Bangkok. *Journal of the Medical Association of Thailand* 2002;85:154-61.

- Kuriwaka Y. [A biomechanical study of osteoarthritis of the knee with special reference to the rotatory movement of the knee joint]. *Nihon Seikeigeka Gakkai zasshi* 1982;1982/08/01:713-26.
- Kuroyanagi Y, et al. A quantitative assessment of varus thrust in patients with medial knee osteoarthritis. *The Knee* 2012;2011/02/09:130-4.
- Kutzner I, et al. The influence of footwear on knee joint loading during walking -- in vivo load measurements with instrumented knee implants. *Journal of biomechanics* 2013;46:796-800.
- Laclriga Gimnez AF, et al. Self-knowledge, treatment adherence and comorbidity in knee-osteoarthritis. *SCOPIA study. trauma* 2012;23:84-90.
- Lai DT, et al. Ultrasound monitoring of inter-knee distances during gait. Conference proceedings : Annual International Conference of the IEEE Engineering in Medicine and Biology Society IEEE Engineering in Medicine and Biology Society Conference 2009;2009/12/08:725-8.
- Laidlaw MS, et al. Assessment of tibiofemoral position in total knee arthroplasty using the active flexion lateral radiograph. *The Knee* 2010;2009/09/08:38-42.
- Lammentausta E, et al. Quantitative MRI of parallel changes of articular cartilage and underlying trabecular bone in degeneration. *Osteoarthritis and cartilage / OARS, Osteoarthritis Research Society* 2007;2007/05/16:1149-57.
- Lancianese SL, et al. Predicting regional variations in trabecular bone mechanical properties within the human proximal tibia using MR imaging. *Bone* 2008;2008/08/30:1039-46.
- Lane NE. Osteoarthritis of the hip. *New England Journal of Medicine* 2007;357:1413-21.
- Lange AK, et al. Degenerative meniscus tears and mobility impairment in women with knee osteoarthritis. *Osteoarthritis and cartilage / OARS, Osteoarthritis Research Society* 2007;2007/01/09:701-8.
- Lange AK, et al. Strength training for treatment of osteoarthritis of the knee: A systematic review. *Arthritis Care and Research* 2008;59:1488-94.
- Lange AK, et al. Resistive Exercise for Arthritic Cartilage Health (REACH): a randomized double-blind, sham-exercise controlled trial. *BMC geriatrics* 2009;2009/01/16:1.
- Langguth DM, et al. Synovial osteochondromatosis. *Internal Medicine Journal* 2002;32:419-20.
- Lankester BJA, et al. Variation in the anatomy of the tibial plateau: a possible factor in the development of anteromedial osteoarthritis of the knee. *Journal of Bone & Joint Surgery, British Volume* 2008;90B:330-3.
- Lankester BJA, et al. Variation in the anatomy of the tibial plateau. *Journal of Bone and Joint Surgery - Series B* 2008;90:330-3.
- Lapane KL, et al. Use of complementary and alternative medicine among patients with, radiographic-confirmed knee osteoarthritis. *Osteoarthritis and Cartilage* 2012;20:22.
- LaPrade RF, et al. The effects of aggressive notchplasty on the normal knee in dogs. *American Journal of Sports Medicine* 1998;26:193-200.
- LaPrade RF, et al. Winner of the Albert Trillat Young Investigator Award. The effects of aggressive notchplasty on the normal knee in dogs. *The American journal of sports medicine* 1998;1998/04/21:193-200.
- Larsson AC, et al. Functional capacity and early radiographic osteoarthritis in middle-aged people with chronic knee pain. *Physiotherapy research international : the journal for researchers and clinicians in physical therapy* 1998;1998/10/23:153-63.
- Lassoued S, et al. Fatty Involution of the Gluteus Medius Muscles: A Late-Onset Girdle Myopathy? *Seminars in arthritis and rheumatism* 2011;41:477-81.
- Lattermann C, et al. Staging and comorbidities. *The journal of knee surgery* 2011;2012/02/07:217-24.
- Lazebnik LB, et al. Efficacy of chondroitin sulphate in the treatment of elderly patients with gonarthrosis and coxarthrosis. *Terapevticheskii Arkhiv* 2005;77:64-9.
- Le Graverand MP, et al. Assessment of the radioanatomic positioning of the osteoarthritic knee in serial radiographs: comparison of three acquisition techniques. *Osteoarthritis and cartilage / OARS, Osteoarthritis Research Society* 2006;2006/06/21:A37-A43.
- Lee CS, et al. Early Nontraumatic Fracture of the Polyethylene Tibial Post in a NexGen LPS-Flex Posterior Stabilized Knee Prosthesis. *Journal of Arthroplasty* 2009;24:1292.
- Lee DH, et al. Osteoporosis affects component positioning in computer navigation-assisted total knee arthroplasty. *The Knee* 2012;2011/05/03:203-7.
- Lee DH, et al. Preoperative and postoperative comparisons of navigation and radiologic limb alignment measurements after high tibial osteotomy. *Arthroscopy : the journal of arthroscopic & related surgery : official publication of the Arthroscopy Association of North America and the International Arthroscopy Association* 2012;2012/08/07:1842-50.
- Lee HJ, et al. Comparison of joint line position changes after primary bilateral total knee arthroplasty performed using the navigation-assisted measured gap resection or gap balancing techniques. *Knee surgery, sports traumatology, arthroscopy : official journal of the ESSKA* 2011;2011/03/25:2027-32.
- Lee JA. Adult degenerative joint disease of the knee: Maximizing function and promoting joint health. *Postgraduate Medicine* 1997;102:167-79.
- Leitch KM, et al. Changes in valgus and varus alignment neutralize aberrant frontal plane knee moments in patients with unicompartmental knee osteoarthritis. *Journal of biomechanics* 2013;46:1408-12.
- Leonard GR, et al. Total Knee Arthroplasty in Patients With a Left Ventricular Assist Device. *Journal of Arthroplasty* 2013;28:376.
- Levine HB, et al. Sagittal and coronal biomechanics of the knee: A rationale for corrective measures. *Bulletin of the NYU Hospital for Joint Diseases* 2007;65:87-95.

- Levinger P, et al. Relationship between foot function and medial knee joint loading in people with medial compartment knee osteoarthritis. *Journal of foot and ankle research* 2013;2013/08/10:33.
- Lewek MD, et al. Control of frontal plane knee laxity during gait in patients with medial compartment knee osteoarthritis. *Osteoarthritis and cartilage / OARS, Osteoarthritis Research Society* 2004;2004/08/25:745-51.
- Lewek MD. Knee malalignment and the progression of osteoarthritis University of Delaware; 2004.
- Lewek MD, et al. Stride-to-stride variability of knee motion in patients with knee osteoarthritis. *Gait & posture* 2006;2005/07/19:505-11.
- Li G, et al. In vivo articular cartilage contact kinematics of the knee: an investigation using dual-orthogonal fluoroscopy and magnetic resonance image-based computer models. *The American journal of sports medicine* 2005;2004/12/22:102-7.
- Li MG, et al. Mobile vs. fixed bearing unicondylar knee arthroplasty: A randomized study on short term clinical outcomes and knee kinematics. *The Knee* 2006;2006/06/27:365-70.
- Li Q, et al. [Case-control study on the relationship between body mass index and lower limb alignment of patients with knee osteoarthritis]. *Zhongguo gu shang = China journal of orthopaedics and traumatology* 2011;2012/02/03:911-4.
- Liden M, et al. Osteoarthritic changes after anterior cruciate ligament reconstruction using bone-patellar tendon-bone or hamstring tendon autografts: a retrospective, 7-year radiographic and clinical follow-up study. *Arthroscopy : the journal of arthroscopic & related surgery : official publication of the Arthroscopy Association of North America and the International Arthroscopy Association* 2008;2008/07/29:899-908.
- Lidtke RH, et al. Foot center of pressure and medial knee osteoarthritis. *Journal of the American Podiatric Medical Association* 2010;2010/05/19:178-84.
- Liikavainio T, et al. Loading and gait symmetry during level and stair walking in asymptomatic subjects with knee osteoarthritis: importance of quadriceps femoris in reducing impact force during heel strike? *The Knee* 2007;2007/04/25:231-8.
- Liikavainio T, et al. Physical Function and Properties of Quadriceps Femoris Muscle in Men With Knee Osteoarthritis. *Archives of physical medicine and rehabilitation* 2008;89:2185-94.
- Liikavainio T, et al. Gait and muscle activation changes in men with knee osteoarthritis. *The Knee* 2010;17:69-76.
- Lim BW, et al. Varus malalignment and its association with impairments and functional limitations in medial knee osteoarthritis. *Arthritis and rheumatism* 2008;2008/06/26:935-42.
- Lim BW, et al. The association of quadriceps strength with the knee adduction moment in medial knee osteoarthritis. *Arthritis and rheumatism* 2009;2009/04/01:451-8.
- Lim HC, et al. Bilateral stress fracture of the femoral shaft after total knee arthroplasty. A case report. *The Knee* 2011;18:354-7.
- Lim YZ, et al. Are biomechanical factors, meniscal pathology, and physical activity risk factors for bone marrow lesions at the knee? A systematic review. *Seminars in arthritis and rheumatism* 2013;2013/10/26:187-94.
- Lin D, et al. Efficacy of 2 non-weight-bearing interventions, proprioception training versus strength training, for patients with knee osteoarthritis: a randomized clinical trial. *Journal of Orthopaedic & Sports Physical Therapy* 2009;39:450-7.
- Lin J, et al. Marked disability and high use of nonsteroidal antiinflammatory drugs associated with knee osteoarthritis in rural China: a cross-sectional population-based survey. *Arthritis research & therapy* 2010;2010/12/31:R225.
- Lin JH, et al. [Disability and common treatment strategies associated with knee pain in a rural Chinese population]. *Zhonghua yi xue za zhi* 2010;2010/10/27:1477-81.
- Lin WP, et al. Quadriceps-sparing, minimal-incision total knee arthroplasty: a comparative study. *The Journal of arthroplasty* 2009;2008/09/02:1024-32.
- Lind M, et al. Gait analysis of walking before and after medial opening wedge high tibial osteotomy. *Knee surgery, sports traumatology, arthroscopy : official journal of the ESSKA* 2011;2011/04/13.
- Ling J, et al. Marked disability and high use of nonsteroidal antiinflammatory drugs associated with knee osteoarthritis in rural China: A cross-sectional population-based survey. *Arthritis Research and Therapy* 2010;12.
- Linley HS, et al. A biomechanical analysis of trunk and pelvis motion during gait in subjects with knee osteoarthritis compared to control subjects. *Clinical Biomechanics* 2010;25:1003-10.
- Liu X, et al. Redistribution of knee stress using laterally wedged insole intervention: Finite element analysis of knee-ankle-foot complex. *Clinical Biomechanics* 2013;28:61-7.
- Lizaur Utrilla A, et al. Position of the components of total knee prostheses and their clinical correlation. *Revista de Ortopedia y Traumatologia* 1998;42:438-42.
- Lizaur A, et al. The patella in total knee replacements with a symmetric femoral component: A prospective study with a 3 to 7 year followup. *Revista de Ortopedia y Traumatologia* 2006;50:441-6.
- Llopis E, et al. Anterior knee pain. *European Journal of Radiology* 2007;62:27-43.
- Lo GH, et al. Associations of varus thrust and alignment with pain in knee osteoarthritis. *Arthritis and rheumatism* 2012;2012/02/07:2252-9.
- Logan M, et al. The Effect of Posterior Cruciate Ligament Deficiency on Knee Kinematics. *American Journal of Sports Medicine* 2004;32:1915-22.
- Logan M, et al. Tibiofemoral Kinematics of the Anterior Cruciate Ligament (ACL)-Deficient Weightbearing, Living Knee Employing Vertical Access Open "Interventional" Multiple Resonance Imaging. *American Journal of Sports Medicine* 2004;32:720-6.
- Lone AR, et al. Analgesic efficacy of transcutaneous electrical nerve stimulation compared with diclofenac sodium in osteo-arthritis of the knee. *Physiotherapy* 2003;89:478-85.

- Lonner JH, et al. Robotic arm-assisted UKA improves tibial component alignment: a pilot study. *Clinical orthopaedics and related research* 2010;2009/07/14:141-6.
- Lootvoet L, et al. Total knee arthroplasty in severe valgus deformity. *Acta orthopaedica Belgica* 1997;63:278-86.
- Lopez MJ, et al. Hamstring Graft Technique for Stabilization of Canine Cranial Cruciate Ligament Deficient Stifles. *Veterinary Surgery* 2003;32:390-401.
- Lopez MJ, et al. A comparison of joint stability between anterior cruciate intact and deficient knees: A new canine model of anterior cruciate ligament disruption. *Journal of Orthopaedic Research* 2003;21:224-30.
- Luo CF, et al. Reliability of the transepicondylar line as a parameter of femoral axial alignment. *Journal of orthopaedic science : official journal of the Japanese Orthopaedic Association* 2001;2002/02/15:373-7.
- Lynn SK, et al. The influence of gait pattern on signs of knee osteoarthritis in older adults over a 5-11 year follow-up period: a case study analysis. *The Knee* 2007;2006/11/10:22-8.
- Lynn SK, et al. Effect of foot rotation on knee kinetics and hamstring activation in older adults with and without signs of knee osteoarthritis. *Clinical Biomechanics* 2008;23:779-86.
- Lynn SK, et al. Frontal plane knee moments in golf: Effect of target side foot position at address. *Journal of Sports Science and Medicine* 2010;9:275-81.
- Lynn SK, Costigan PA. THE EFFECT OF GAIT LOADS ON THE PROGRESSION OF RADIOGRAPHIC KNEE OSTEOARTHRITIS: A 5-11 YEAR FOLLOW-UP. (Abstract). In *Canadian Society for Biomechanics, Proceedings, 13th Biennial Conference, Canadian Society for Biomechanics, Halifax Aug 4-7 2004, Nova Scotia, Canadian Institutes of Health Research, 2004, p.204.*Canada: 2004.
- Ma SM, et al. Anametric total knee arthroplasty. *Orthopedic Clinics of North America* 1982;13:45-54.
- Ma YF, et al. [Multiple linear regression analysis of X-ray measurement and WOMAC scores of knee osteoarthritis]. *Zhongguo gu shang = China journal of orthopaedics and traumatology* 2012;2012/08/09:373-6.
- MacDonald P, et al. A biomechanical analysis of joint contact forces in the posterior cruciate deficient knee. *Knee surgery, sports traumatology, arthroscopy : official journal of the ESSKA* 1996;1996/01/01:252-5.
- Madan S, et al. Intermediate follow-up of high tibial osteotomy: a comparison of two techniques. *Bulletin (Hospital for Joint Diseases (New York, N Y ))* 2002;2003/06/28:11-6.
- Madry H, et al. Biological aspects of early osteoarthritis. *Knee surgery, sports traumatology, arthroscopy : official journal of the ESSKA* 2012;2011/10/20:407-22.
- Madsen OR, et al. Isometric and isokinetic quadriceps strength in gonarthrosis; inter-relations between quadriceps strength, walking ability, radiology, subchondral bone density and pain. *Clinical rheumatology* 1995;14:308-14.
- Magalhães CMB, et al. Increased hip internal abduction moment and reduced speed are the gait strategies used by women with knee osteoarthritis. *Journal of electromyography and kinesiology* 2013;23:1243-9.
- Magyar G, et al. Changes in osseous correction after proximal tibial osteotomy. *Acta Orthopaedica Scandinavica* 1999;70:473.
- Mak J, et al. Ipsilateral total hip arthroplasty in a dysvascular below-knee amputee for advanced hip osteoarthritis: A case report and review of the literature. *Prosthetics and Orthotics International* 2008;32:155-9.
- Malfait AM, et al. ADAMTS-5 deficient mice do not develop mechanical allodynia associated with osteoarthritis following medial meniscal destabilization. *Osteoarthritis and cartilage / OARS, Osteoarthritis Research Society* 2010;2009/12/29:572-80.
- Malvankar S, et al. How Effective are Lateral Wedge Orthotics in Treating Medial Compartment Osteoarthritis of the Knee? A Systematic Review of the Recent Literature. *The open orthopaedics journal* 2012;2012/12/19:544-7.
- Maly M, et al. Static and dynamic biomechanics of foot orthoses in people with medial compartment knee osteoarthritis. *Clinical Biomechanics* 2002;17:603.
- Maly MR, et al. Contribution of psychosocial and mechanical variables to physical performance measures in knee osteoarthritis. *Physical Therapy* 2005;85:1318-28.
- Maly MR, et al. Mechanical factors relate to pain in knee osteoarthritis. *Clinical Biomechanics* 2008;23:796-805.
- Maly MR. Linking biomechanics to mobility and disability in people with knee osteoarthritis. *Exercise and Sport Sciences Reviews* 2009;37:36-42.
- Maly MR, et al. Cumulative knee adductor load distinguishes between healthy and osteoarthritic knees--a proof of principle study. *Gait & posture* 2013;2012/09/22:397-401.
- Maly M, Costigan P, Olney S. KNEE KINEMATICS, KNEE KINETICS AND HIP KINETICS IN MEDIAL COMPARTMENT KNEE OA. (Abstract). In *Canadian Society for Biomechanics, Proceedings, 13th Biennial Conference, Canadian Society for Biomechanics, Halifax Aug 4-7 2004, Nova Scotia, Canadian Institutes of Health Research, 2004, p.136.*Canada: 2004.
- Mancuso CA, et al. Indications for total hip and total knee arthroplasties. Results of orthopaedic surveys. *The Journal of arthroplasty* 1996;1996/01/01:34-46.
- Manetta J, et al. Comparison of hip and knee muscle moments in subjects with and without knee pain. *Gait & posture* 2002;16:249.
- Maquet P, et al. Mechanical pressure on the knee during walking. *Acta orthopaedica Belgica* 1975;41:119-32.
- Marks R. Obesity profiles with knee osteoarthritis: correlation with pain, disability, disease progression. *Obesity (Silver Spring, Md )* 2007;2007/07/20:1867-74.

- Marks R. Physical and psychological correlates of disability among a cohort of individuals with knee osteoarthritis. Canadian journal on aging = La revue canadienne du vieillissement 2007;2008/02/29:367-77.
- Marks R. Knee osteoarthritis and exercise adherence: A review. Current Aging Science 2012;5:72-83.
- Marsh AP, et al. Baseline balance and functional decline in older adults with knee pain: The Observational Arthritis Study in Seniors. Journal of the American Geriatrics Society 2003;51:331-9.
- Martel-Pelletier J, et al. Is osteoarthritis a disease involving only cartilage or other articular tissues? Eklem hastalıkları ve cerrahisi = Joint diseases & related surgery 2010;2010/03/23:2-14.
- Martin A, et al. [Post-traumatic osteoarthritis of the knee: special indication for navigated TKA]. Der Unfallchirurg 2008;2008/02/28:754-8.
- Mason RB, et al. The posteroanterior 45 degrees flexion weight-bearing radiograph of the knee. The Journal of arthroplasty 1995;1995/12/01:790-2.
- Massai F, et al. Tibial stress fracture after computer-navigated total knee arthroplasty. Journal of Orthopaedics and Traumatology 2010;11:123-7.
- Matsuno H, et al. Generation II knee bracing for severe medial compartments osteoarthritis of the knee. Archives of physical medicine and rehabilitation 1997;78:745-9.
- Matziolis G, et al. Kinematic analysis of the flexion axis for correct femoral component placement. Knee surgery, sports traumatology, arthroscopy : official journal of the ESSKA 2011;2011/05/26:1504-9.
- Mayr HO, et al. Revision of anterior cruciate ligament reconstruction with patellar tendon allograft and autograft: 2- and 5-year results. Archives of orthopaedic and trauma surgery 2012;2012/02/22:867-74.
- Mazzuca SA, et al. Is knee radiography useful for studying the efficacy of a disease-modifying osteoarthritis drug in humans? Rheumatic diseases clinics of North America 2003;2003/11/08:819-30.
- Mazzuca SA, et al. Malalignment and subchondral bone turnover in contralateral knees of overweight/obese women with unilateral osteoarthritis: Implications for bilateral disease. Arthritis care & research 2011;63:1528-34.
- McCarthy CJ, et al. Supplementing a home exercise programme with a class-based exercise programme is more effective than home exercise alone in the treatment of knee osteoarthritis. Rheumatology 2004;43:880-6.
- McDaniel G, et al. Association of knee and ankle osteoarthritis with physical performance. Osteoarthritis and cartilage / OARS, Osteoarthritis Research Society 2011;2011/02/12:634-8.
- McKean KA, et al. Gender differences exist in osteoarthritic gait. Clinical biomechanics (Bristol, Avon) 2007;2007/01/24:400-9.
- McNamara I, et al. High tibial osteotomy: Evolution of research and clinical applications-a Canadian experience. Knee surgery, sports traumatology, arthroscopy : official journal of the ESSKA 2013;21:23-31.
- McNicholas MJ, et al. The influence of external knee moments on the outcome of total meniscectomy. A comparison of radiological and 3-D gait analysis measurements. Gait and Posture 2000;11:233-8.
- McWalter EJ, et al. Relationship between varus-valgus alignment and patellar kinematics in individuals with knee osteoarthritis. The Journal of bone and joint surgery American volume 2007;2007/12/07:2723-31.
- McWalter EJ, et al. The effect of a patellar brace on three-dimensional patellar kinematics in patients with lateral patellofemoral osteoarthritis. Osteoarthritis and cartilage / OARS, Osteoarthritis Research Society 2011;2011/03/15:801-8.
- McWilliams DF, et al. Self-reported knee and foot alignments in early adult life and risk of osteoarthritis. Arthritis care & research 2010;2010/04/15:489-95.
- Meding JB, et al. Total knee arthroplasty after high tibial osteotomy: a comparison study in patients who had bilateral total knee replacement. Journal of Bone and Joint Surgery 2000;82A:1252-9.
- Meding JB, et al. The planovalgus foot: A harbinger of failure of posterior cruciate-retaining total knee replacement. Journal of Bone and Joint Surgery - Series A 2005;87:59-62.
- Meehan JP, et al. Closing wedge retrotubercular tibial osteotomy and TKA for posttraumatic osteoarthritis with angular deformity. Orthopedics 2009;2009/05/29:360.
- Mehling I, et al. (i) Comminuted patellar fractures. Current Orthopaedics 2006;20:397-404.
- Mermerci BaÅŸkan B, et al. Factors related with quality of life in patients with knee osteoarthritis. Journal of Rheumatology and Medical Rehabilitation 2009;20:53-9.
- Messieh SS, et al. Anteroposterior radiographs of the osteoarthritic knee. The Journal of bone and joint surgery British volume 1990;1990/07/01:639-40.
- Messier SP, et al. Exercise and weight loss in obese older adults with knee osteoarthritis: a preliminary study. Journal of the American Geriatrics Society 2000;2000/09/13:1062-72.
- Messier SP, et al. Exercise and Dietary Weight Loss in Overweight and Obese Older Adults with Knee Osteoarthritis: The Arthritis, Diet, and Activity Promotion Trial. Arthritis and rheumatism 2004;50:1501-10.
- Messier SP, et al. Weight loss reduces knee-joint loads in overweight and obese older adults with knee osteoarthritis. Arthritis and rheumatism 2005;2005/06/30:2026-32.
- Messier SP, et al. Do older adults with knee osteoarthritis place greater loads on the knee during gait? A preliminary study. Archives of physical medicine and rehabilitation 2005;2005/04/14:703-9.

- Messier SP, et al. Does high weight loss in older adults with knee osteoarthritis affect bone-on-bone joint loads and muscle forces during walking? Osteoarthritis and cartilage / OARS, Osteoarthritis Research Society 2011;2010/12/08:272-80.
- Messier SP, et al. Strength training for arthritis trial (START): Design and rationale. BMC musculoskeletal disorders 2013;14.
- Messier SP, et al. Effects of intensive diet and exercise on knee joint loads, inflammation, and clinical outcomes among overweight and obese adults with knee osteoarthritis: the IDEA randomized clinical trial. JAMA : the journal of the American Medical Association 2013;2013/09/26:1263-73.
- Messner K, et al. Radiographic joint space narrowing and histologic changes in a rabbit meniscectomy model of early knee osteoarthritis. American Journal of Sports Medicine 2001;29:151-60.
- Mi Lee J, et al. Natural history of the post-meniscectomy knee. Sports Medicine and Arthroscopy Review 2002;10:236-43.
- Miller GD, et al. The Arthritis, Diet and Activity Promotion Trial (ADAPT): design, rationale, and baseline results. Controlled clinical trials 2003;2003/07/17:462-80.
- Miller RH, et al. Predicting sagittal plane biomechanics that minimize the axial knee joint contact force during walking. J biomech eng 2013;135:011007.
- Miller RH, et al. Why don't most runners get knee osteoarthritis? A case for per-unit-distance loads. Medicine and science in sports and exercise 2013.
- Mills K, et al. Between-Limb Kinematic Asymmetry During Gait in Unilateral and Bilateral Mild to Moderate Knee Osteoarthritis. Archives of physical medicine and rehabilitation 2013.
- Mills K, et al. A systematic review and meta-analysis of lower limb neuromuscular alterations associated with knee osteoarthritis during level walking. Clinical biomechanics (Bristol, Avon) 2013;2013/08/21:713-24.
- Milner CE. Interlimb asymmetry during walking following unilateral total knee arthroplasty. Gait and Posture 2008;28:69-73.
- Milner SA, et al. Long-term outcome after tibial shaft fracture: is malunion important? The Journal of bone and joint surgery American volume 2002;2002/06/14:971-80.
- Minick KI, et al. Gait mechanics in asymptomatic males and females ages 18 to 40: implications for differential knee osteoarthritis progression between genders. Journal of Orthopaedic & Sports Physical Therapy 2009;39:A51-A52.
- Minoda M, et al. Multiple huge subchondral cysts associated with pseudogout in the bilateral knees: A case report and review of the literatures. Journal of orthopedic science 2012;17:817-21.
- Minor MA. Physical activity and knee osteoarthritis: answers and questions. Arthritis and rheumatism 2007;2007/02/03:1-2.
- Miyazaki T, et al. Dynamic load at baseline can predict radiographic disease progression in medial compartment knee osteoarthritis. Annals of the rheumatic diseases 2002;2002/06/25:617-22.
- Miyazaki T, et al. Anteroposterior and varus-valgus laxity of the knee increase after stair climbing in patients with mild osteoarthritis. Rheumatology international 2012;32:2823-8.
- Miyazaki T, et al. Knee laxity after staircase exercise predicts radiographic disease progression in medial compartment knee osteoarthritis. Arthritis and rheumatism 2012;64:3908-16.
- Mizner RL. Quadriceps femoris weakness and functional outcome in individuals with end-stage knee osteoarthritis University of Delaware; 2004.
- Mizu-Uchi H, et al. Three-dimensional analysis of computed tomography-based navigation system for total knee arthroplasty: the accuracy of computed tomography-based navigation system. The Journal of arthroplasty 2009;2008/10/14:1103-10.
- Mochizuki T, et al. In vivo pre- and postoperative three-dimensional knee kinematics in unicompartmental knee arthroplasty. Journal of orthopaedic science : official journal of the Japanese Orthopaedic Association 2013;2012/11/02:54-60.
- Moffat M. Braving new worlds: To conquer, to endure. Physical Therapy 2004;84:1056-86.
- Moio K, et al. Varus-valgus alignment: reduced risk of subsequent cartilage loss in the less loaded compartment. Arthritis and rheumatism 2011;2011/01/13:1002-9.
- Molli RG, et al. Computer-assisted navigation software advancements improve the accuracy of total knee arthroplasty. The Journal of arthroplasty 2011;2010/03/26:432-8.
- Monk AP, et al. In vivo sagittal plane kinematics of the FPV patellofemoral replacement. Knee surgery, sports traumatology, arthroscopy : official journal of the ESSKA 2012;2011/10/20:1104-9.
- Mononen ME, et al. Alterations in structure and properties of collagen network of osteoarthritic and repaired cartilage modify knee joint stresses. Biomechanics and modeling in mechanobiology 2011;2010/07/16:357-69.
- Mononen ME, et al. Effect of superficial collagen patterns and fibrillation of femoral articular cartilage on knee joint mechanics-a 3D finite element analysis. Journal of biomechanics 2012;2011/12/06:579-87.
- Mononen ME, et al. Implementation of a gait cycle loading into healthy and meniscectomised knee joint models with fibril-reinforced articular cartilage. Computer Methods in Biomechanics and Biomedical Engineering 2013;2013/04/11.
- Morgan SS, et al. The influence of postoperative coronal alignment on revision surgery in total knee arthroplasty. International orthopaedics 2008;2007/07/06:639-42.
- Mori S, et al. Tibia vara affects the aspect ratio of tibial resected surface in female Japanese patients undergoing TKA. Clinical orthopaedics and related research 2013;2013/01/31:1465-71.

- Moroni A, et al. State of the art review: techniques to avoid pin loosening and infection in external fixation. *Journal of orthopaedic trauma* 2002;2002/03/07:189-95.
- Mosher TJ, et al. Functional cartilage MRI T2 mapping: evaluating the effect of age and training on knee cartilage response to running. *Osteoarthritis and cartilage / OARS, Osteoarthritis Research Society* 2010;2009/12/02:358-64.
- Motlagh FN, et al. Ankle rotation changes and its influences in knee osteoarthritis. *Medical Journal of the Islamic Republic of Iran* 2013;27:67-76.
- Mounach A, et al. Risk factors for knee osteoarthritis in Morocco. A case control study. *Clinical rheumatology* 2008;27:323-6.
- Moussa M. Rotational malalignment and femoral torsion in osteoarthritic knees with patellofemoral joint involvement. A CT scan study. *Clinical orthopaedics and related research* 1994;1994/07/01:176-83.
- Moyer RF, et al. Alignment, body mass and their interaction on dynamic knee joint load in patients with knee osteoarthritis. *Osteoarthritis and cartilage / OARS, Osteoarthritis Research Society* 2010;2010/04/27:888-93.
- Mueller PS. Osteoarthritis of the hip or knee raises mortality risk. *New England Journal of Medicine* 2011;12:86-7.
- Mukaimi AA, et al. Osteoarthritis of the knee: Review of risk factors and treatment programs with special reference to evidence-based research. *Kuwait Medical Journal* 2011;43:176-88.
- Mullaji A, et al. Persistent hindfoot valgus causes lateral deviation of weightbearing axis after total knee arthroplasty. *Clinical orthopaedics and related research* 2011;2010/12/02:1154-60.
- Mullaji AB, et al. Unicompartmental knee arthroplasty: functional recovery and radiographic results with a minimally invasive technique. *The Journal of arthroplasty* 2007;2007/08/25:7-11.
- Mullaji AB, et al. A comparison of coronal plane axial femoral relationships in Asian patients with varus osteoarthritic knees and healthy knees. *The Journal of arthroplasty* 2009;2008/08/15:861-7.
- Muller-Rath R, et al. [Clinical and gait analytical investigation of valgus knee bracing in therapy for medial degenerative joint disease of the knee]. *Zeitschrift fur Orthopadie und Unfallchirurgie* 2011;2010/04/15:160-5.
- Mullis BH, et al. Characterization of a consistent radiographic finding in chronic anterior cruciate ligament deficiency: the posteromedial osteophyte. *American journal of orthopedics (Belle Mead, N J)* 2007;2007/10/20:494-7.
- Mundermann A, et al. Secondary gait changes in patients with medial compartment knee osteoarthritis: Increased load at the ankle, knee, and hip during walking. *Arthritis and rheumatism* 2005;52:2835-44.
- Munnich U, et al. [Development of physical and sports activity in patients before and after implantation of a total knee endoprosthesis. A prospective study of 40 patients]. *Versicherungsmedizin / herausgegeben von Verband der Lebensversicherungs-Unternehmen e V und Verband der Privaten Krankenversicherung e V* 2003;2003/07/04:82-6.
- Muraki S, et al. Association of occupational activity with radiographic knee osteoarthritis and lumbar spondylosis in elderly patients of population-based cohorts: a large-scale population-based study. *Arthritis and rheumatism* 2009;2009/05/30:779-86.
- Muraki S, et al. Risk factors for falls in a longitudinal population-based cohort study of Japanese men and women: The ROAD Study. *Bone* 2012;2012/10/30.
- Muraki S, et al. Physical performance, bone and joint diseases, and incidence of falls in Japanese men and women: a longitudinal cohort study. *Osteoporosis international : a journal established as result of cooperation between the European Foundation for Osteoporosis and the National Osteoporosis Foundation of the USA* 2013;2012/03/22:459-66.
- Murphy KP. Cerebral palsy lifetime care - Four musculoskeletal conditions. *Developmental Medicine and Child Neurology* 2009;51:30-7.
- Murray MP, et al. Kinesiologic measurements of functional performance before and after McKee-Farrar total hip replacement. A study of thirty patients with rheumatoid arthritis, osteoarthritis, or avascular necrosis of the femoral head. *Journal of Bone and Joint Surgery - Series A* 1972;54:237-56.
- Musacchio E, et al. The impact of knee and hip chondrocalcinosis on disability in older people: the ProVA Study from northeastern Italy. *Annals of the rheumatic diseases* 2011;2011/08/09:1937-43.
- Musil D, et al. [Minimally invasive anterolateral surgical approach for total hip arthroplasty: seven-year results]. *Acta chirurgiae orthopaedicae et traumatologiae Cechoslovaca* 2013;2013/04/09:138-41.
- Nadaud MC, et al. Proximal tibiofibular arthritis: An unusual cause of lateral knee pain. *Orthopedics* 2001;24:397-8.
- Nadaud MC, et al. In vivo three-dimensional determination of the effectiveness of the osteoarthritic knee brace: A multiple brace analysis. *Journal of Bone and Joint Surgery - Series A* 2005;87:114-9.
- Nafei A, et al. Total condylar arthroplasty for gonarthrosis. A prospective 10-year study of 138 primary cases. *Acta Orthopaedica Scandinavica* 1993;64:421-7.
- Nagaosa Y, et al. Characterisation of size and direction of osteophyte in knee osteoarthritis: a radiographic study. *Annals of the rheumatic diseases* 2002;2002/03/05:319-24.
- Nagashima H, et al. Preliminary assessment of the safety and efficacy of tanezumab in Japanese patients with moderate to severe osteoarthritis of the knee: a randomized, double-blind, dose-escalation, placebo-controlled study. *Osteoarthritis and cartilage / OARS, Osteoarthritis Research Society* 2011;2011/10/19:1405-12.
- Nakajima K, et al. Addition of an arch support improves the biomechanical effect of a laterally wedged insole. *Gait and Posture* 2009;29:208-13.
- Nakamura E, et al. Three-dimensional tibiofemoral kinematics during deep flexion kneeling in a mobile-bearing total knee arthroplasty. *The Journal of arthroplasty* 2009;2008/10/01:1120-4.
- Nakamura N, et al. Selections From Recent Japanese Language Journals. *American Journal of Sports Medicine* 2011;39:435-7.

- Nakamura S, et al. Fluoroscopic and computed tomographic analysis of knee kinematics during very deep flexion after total knee arthroplasty. *The Journal of arthroplasty* 2010;2009/02/07:486-91.
- Nam D, et al. Radiographic analysis of a hand-held surgical navigation system for tibial resection in total knee arthroplasty. *The Journal of arthroplasty* 2011;2011/03/15:1527-33.
- Nam J, et al. Transcriptome-wide gene regulation by gentle treadmill walking during the progression of monoiodoacetate-induced arthritis. *Arthritis and rheumatism* 2011;63:1613-25.
- Nash MS, et al. Magnetic resonance imaging of osteonecrosis and osteoarthritis in exercising quadriplegics and paraplegics. *American journal of physical medicine & rehabilitation / Association of Academic Physiatrists* 1994;1994/06/01:184-92.
- Neame R, et al. Distribution of radiographic osteoarthritis between the right and left hands, hips, and knees. *Arthritis and rheumatism* 2004;2004/05/18:1487-94.
- Nebel MB, et al. The relationship of self-reported pain and functional impairment to gait mechanics in overweight and obese persons with knee osteoarthritis. *Archives of physical medicine and rehabilitation* 2009;2009/11/06:1874-9.
- Nelson AE, et al. Composite measures of multi-joint symptoms, but not of radiographic osteoarthritis, are associated with functional outcomes: the Johnston County Osteoarthritis Project. *Disability and rehabilitation* 2013;2013/05/04.
- Neogi T, et al. Osteoarthritis prevention. *Current opinion in rheumatology* 2011;2011/01/06:185-91.
- Nestor BJ, et al. Mini-Midvastus vs Standard Medial Parapatellar Approach: A Prospective, Randomized, Double-Blinded Study in Patients Undergoing Bilateral Total Knee Arthroplasty. *Journal of Arthroplasty* 2010;25:5-11.
- Netravali NA, et al. The effect of kinematic and kinetic changes on meniscal strains during gait. *Journal of biomechanical engineering* 2011;2010/12/29:011006.
- Neyret P, et al. [Total knee replacement after valgus tibial osteotomy. Technical problems]. *Revue de chirurgie orthopedique et reparatrice de l'appareil moteur* 1992;1992/01/01:438-48.
- Ng NTM, et al. Efficacy of a progressive walking program and glucosamine sulphate supplementation on osteoarthritic symptoms of the hip and knee: A feasibility trial. *Arthritis Research and Therapy* 2010;12.
- Ng YCS, et al. Management of knee osteoarthritis presenting with tibial stress fractures. *Singapore Medical Journal* 2010;51:e149-e152.
- Nicklas BJ, et al. Diet-induced weight loss, exercise, and chronic inflammation in older, obese adults: a randomized controlled clinical trial. *The American Journal of Clinical Nutrition* 2004;79:544-51.
- Niki Y, et al. Is greater than 145{degrees} of deep knee flexion under weight-bearing conditions safe after total knee arthroplasty?: a fluoroscopic analysis of Japanese-style deep knee flexion. *The bone & joint journal* 2013;2013/06/01:782-7.
- Nishimura A, et al. Total knee arthroplasty in osteogenesis imperfecta: Case report. *The Knee* 2008;15:494-6.
- Noda M, et al. Surgical treatment for permanent dislocation of the patella in adults. *Orthopedics* 2011;2011/12/08:e948-e951.
- Norman Scott W, et al. Early knee arthritis: The role of arthroscopy: Beneficial or placebo? *Orthopedics* 2003;26:943-4.
- Nunley RM, et al. Do patient-specific guides improve coronal alignment in total knee arthroplasty? *Clinical orthopaedics and related research* 2012;2011/12/21:895-902.
- Nunn T, et al. (viii) Blount's disease. *Orthopaedics and Trauma* 2011;25:454-61.
- Oakley SP, et al. A critical appraisal of quantitative arthroscopy as an outcome measure in osteoarthritis of the knee. *Seminars in arthritis and rheumatism* 2003;2003/11/20:83-105.
- Okamoto R. [High tibial osteotomy for osteoarthritis of the knee]. *Clinical calcium* 2002;2005/03/19:70-6.
- Ollivier M, et al. Relation between lower extremity alignment and proximal femur anatomy. Parameters during total hip arthroplasty. *Orthopaedics & traumatology, surgery & research : OTSR* 2013;2013/06/29:493-500.
- Omori G. Epidemiology of knee osteoarthritis. *Acta Medica et Biologica* 2005;53:1-11.
- Orishimo KF, et al. Does total knee arthroplasty change frontal plane knee biomechanics during gait? *Clinical orthopaedics and related research* 2012;2011/11/30:1171-6.
- Orlic D. [Endoprosthetic procedures in rheumatoid patients]. *Reumatizam* 2003;2004/04/22:7-14.
- Orlik B, Dunbar MJ, Amirault DJ, Hennigar AW, Leahey L. VALIDITY AND RELIABILITY OF ACCELEROMETRIC GAIT ANALYSIS IN THE ASSESSMENT OF OSTEOARTHRITIS OF THE KNEE. (Abstract). In Canadian Society for Biomechanics, Proceedings, 13th Biennial Conference, Canadian Society for Biomechanics, Halifax Aug 4-7 2004, Nova Scotia, Canadian Institutes of Health Research, 2004, p.22.Canada: 2004.
- Osaki M, et al. Physical performance and knee osteoarthritis among community-dwelling women in Japan: the Hizen-Oshima Study, cross-sectional study. *Rheumatology international* 2012;2011/05/06:2245-9.
- Oztuna V, et al. Involvement of the proximal tibiofibular joint in osteoarthritis of the knee. *Knee* 2003;10:347-9.
- Paans N, et al. Effect of exercise and weight loss in people who have hip osteoarthritis and are overweight or obese: A prospective cohort study. *Physical Therapy* 2013;93:137-46.
- Pagani CH, et al. Short-term effects of a dedicated knee orthosis on knee adduction moment, pain, and function in patients with osteoarthritis. *Archives of physical medicine and rehabilitation* 2010;2010/11/30:1936-41.
- Pagenstert G, et al. Simultaneous bilateral total knee and ankle arthroplasty as a single surgical procedure. *BMC musculoskeletal disorders* 2011;12.

- Pagenstert GJ, et al. Realignment surgery as alternative treatment of varus and valgus ankle osteoarthritis. *Clinical orthopaedics and related research* 2007;156-68.
- Palacios Blancarte F, et al. [Unicompartment knee arthroplasty with an Oxford prosthesis]. *Acta ortopedica mexicana* 2007;2007/08/19:49-54.
- Palmu SA, et al. Childhood femoral fracture can lead to premature knee-joint arthritis. *Acta orthopaedica* 2013;84:71-5.
- Pandit H, et al. Influence of surface geometry and the cam-post mechanism on the kinematics of total knee replacement. *The Journal of bone and joint surgery British volume* 2005;2005/06/24:940-5.
- Pang CH, et al. Comparison of total knee arthroplasty using computer-assisted navigation versus conventional guiding systems: a prospective study. *Journal of orthopaedic surgery (Hong Kong)* 2009;2009/09/02:170-3.
- Pang H, et al. Computational modeling of bone density profiles in response to gait: a subject-specific approach. *Biomechanics and modeling in mechanobiology* 2012;2011/05/24:379-90.
- Panula HE, et al. Slowly progressive osteoarthritis after tibial valgus osteotomy in young beagle dogs. *Clinical orthopaedics and related research* 1997;1997/11/05:192-202.
- Papachristou G. Photoelastic study of the internal and contact stresses on the knee joint before and after osteotomy. *Archives of orthopaedic and trauma surgery* 2004;2004/04/03:288-97.
- Papadopoulos JS. [Gonarthrosis: is the role of pathological statics overestimated?]. *Zeitschrift fur Orthopadie und ihre Grenzgebiete* 1991;1991/01/01:65-71.
- Papagelopoulos PJ, et al. Hip and knee replacement in osteogenesis imperfecta. *Journal of Bone and Joint Surgery - Series A* 1993;75:572-80.
- Papas TT, et al. Popliteal artery pseudoaneurysm after total knee replacement. *VASA Zeitschrift fur Gefasskrankheiten* 2007;2007/08/22:145-8.
- Park JW, et al. Simultaneous cemented and cementless total knee replacement in the same patients: A prospective comparison of long-term outcomes using an identical design of NexGen prosthesis. *Journal of Bone & Joint Surgery, British Volume* 2011;93:1479-86.
- Park SE, et al. Comparison of robotic-assisted and conventional manual implantation of a primary total knee arthroplasty. *The Journal of arthroplasty* 2007;2007/10/09:1054-9.
- Parmet S, et al. Osteoarthritis of the Knee. *Journal of the American Medical Association* 2003;289:1068.
- Paus AC, et al. Arthroscopic and radiographic examination of patients with juvenile rheumatoid arthritis before and after open synovectomy of the knee joint. A prospective study with a 5-year follow-up. *Annales Chirurgiae et Gynaecologiae* 1993;82:55-61.
- Pavelka J, et al. Glucosamine sulfate use and delay of progression of knee osteoarthritis: A 3-year, randomized, placebo-controlled, double-blind study. *Archives of internal medicine* 2002;162:2113-23.
- Pearle AD, et al. Robot-assisted unicompartmental knee arthroplasty. *The Journal of arthroplasty* 2010;2008/12/06:230-7.
- Pedersen EN, et al. Walking pattern in 9 women with hip dysplasia 18 months after periacetabular osteotomy. *Acta orthopaedica* 2006;2006/06/06:203-8.
- Peixoto JG, et al. Relationships between measures of muscular performance, proprioceptive acuity, and aging in elderly women with knee osteoarthritis. *Archives of Gerontology and Geriatrics* 2011;53:e253-e257.
- Penninx BWJH, et al. Inflammatory markers and physical function among older adults with knee osteoarthritis. *Journal of Rheumatology* 2004;31:2027-31.
- Percoppe Andrade MA, et al. Medial osteoarthritis of the knee: Evaluation of a valgus proximal tibial osteotomy with fixation by Weber's technique. *Revista Brasileira de Ortopedia* 1996;31:377-82.
- Petersen W, et al. [Chronic patellofemoral instability]. *Der Unfallchirurg* 2012;2012/05/17:397-409.
- Petrella RJ, et al. Home based exercise therapy for older patients with knee osteoarthritis: a randomized clinical trial. *The Journal of rheumatology* 2000;2000/09/16:2215-21.
- Petrella RJ. Hyaluronic acid for the treatment of knee osteoarthritis: long-term outcomes from a naturalistic primary care experience. *American journal of physical medicine & rehabilitation / Association of Academic Physiatrists* 2005;2005/03/24:278-83.
- Petrella RJ, et al. A prospective, randomized, double-blind, placebo controlled study to evaluate the efficacy of intraarticular hyaluronic acid for osteoarthritis of the knee. *Journal of Rheumatology* 2006;33:951-6.
- Petterson SC, et al. Disease-specific gender differences among total knee arthroplasty candidates. *Journal of Bone and Joint Surgery - Series A* 2007;89:2327-33.
- Pieler-Bruha E. Effect of exercise and weight loss in people who have hip osteoarthritis and are overweight or obese: A prospective cohort study. *Mineralstoffwechsel* 2013;20:69.
- Pierson JL, et al. Ipsilateral stress fracture of the proximal tibia after primary hybrid total hip arthroplasty. *Orthopedics* 2005;28:409-10.
- Pietrosimone BG, et al. Effects of disinhibitory transcutaneous electrical nerve stimulation and therapeutic exercise on sagittal plane peak knee kinematics and kinetics in people with knee osteoarthritis during gait: a randomized controlled trial. *Clinical rehabilitation* 2010;2010/08/18:1091-101.
- Platzer P, et al. Management and outcome of interprosthetic femoral fractures. *Injury* 2011;2010/12/24:1219-25.
- Podskubka A, et al. Arthroscopic reconstruction of the anterior cruciate ligament by transtibial technique and graft from the patellar tendon - Results after 5 to 6 years. *Acta chirurgiae orthopaedicae et traumatologiae Cechoslovaca* 2002;69:169-74.
- Pohl MB, et al. Gait biomechanics and hip muscular strength in patients with patellofemoral osteoarthritis. *Gait & posture* 2013;2012/10/11:440-4.

- Prix R. [Opening-wedge osteotomy of the proximal tibia]. *Acta chirurgiae orthopaedicae et traumatologiae Cechoslovaca* 2005;2005/12/01:308-12.
- Provelengios S, et al. The role of pantalar arthrodesis in the treatment of paralytic foot deformities. A long-term follow-up study. *The Journal of bone and joint surgery American volume* 2009;2009/03/04:575-83.
- Provelengios S, et al. The role of pantalar arthrodesis in the treatment of paralytic foot deformities. Surgical technique. *The Journal of bone and joint surgery American volume* 2010;2010/03/18:44-54.
- Provenzano DA, et al. Chronic pain syndromes: How to break the cycle, part 1. *Consultant* 2008;48:297-304.
- Pua YH, et al. Association of physical performance with muscle strength and hip range of motion in hip osteoarthritis. *Arthritis and rheumatism* 2009;2009/04/01:442-50.
- Pua YH, et al. Physical function in hip osteoarthritis: relationship to isometric knee extensor steadiness. *Archives of physical medicine and rehabilitation* 2010;2010/07/06:1110-6.
- Purser JL, et al. Association of slower walking speed with incident knee osteoarthritis-related outcomes. *Arthritis care & research* 2012;2012/03/07:1028-35.
- Rajabi R, et al. Radiographic knee osteoarthritis in ex-elite table tennis players. *BMC musculoskeletal disorders* 2012;2012/02/09:12.
- Ramaswamy R, et al. Total knee replacement with rotational proximal tibial osteotomy for osteoarthritis with severe external tibial torsion and patellar instability. *Journal of Bone & Joint Surgery, British Volume* 2009;91:1466-71.
- Ramsey DK, et al. Effect of anatomic realignment on muscle function during gait in patients with medial compartment knee osteoarthritis. *Arthritis and rheumatism* 2007;2007/03/31:389-97.
- Ramsey DK, et al. A mechanical theory for the effectiveness of bracing for medial compartment osteoarthritis of the knee. *The Journal of bone and joint surgery American volume* 2007;2007/11/03:2398-407.
- Ranawat CS, et al. The press-fit condylar modular total knee system. Four-to-six-year results with a posterior-cruciate-substituting design. *Journal of Bone and Joint Surgery - Series A* 1997;79:342-8.
- Rao C, et al. A statistical finite element model of the knee accounting for shape and alignment variability. *Medical engineering & physics* 2013;2013/05/08:1450-6.
- Rasquinha VJ, et al. The press-fit condylar modular total knee system with a posterior cruciate-substituting design: A concise follow-up of a previous report. *Journal of Bone and Joint Surgery - Series A* 2006;88:1006-10.
- Raynauld JP, et al. Safety and efficacy of long-term intraarticular steroid injections in osteoarthritis of the knee: a randomized, double-blind, placebo-controlled trial. *Arthritis and rheumatism* 2003;2003/02/07:370-7.
- Reeves ND, et al. Conservative biomechanical strategies for knee osteoarthritis. *Nature Reviews Rheumatology* 2011;7:113-22.
- Remes V, et al. Walking ability in patients with diastrophic dysplasia: A clinical, electroneurophysiological, treadmill, and MRI analysis. *Journal of Pediatric Orthopaedics* 2004;24:546-51.
- Repicci JA, et al. Minimally invasive unicompartmental knee arthroplasty for the treatment of unicompartmental osteoarthritis: An outpatient arthritic bypass procedure. *Orthopedic Clinics of North America* 2004;35:201-16.
- Richards C, et al. Knee contact force in subjects with symmetrical OA grades: Differences between OA severities. *Journal of biomechanics* 2010;43:2595-600.
- Richards JD, et al. A comparison of knee braces during walking for the treatment of osteoarthritis of the medial compartment of the knee. *Journal of Bone & Joint Surgery, British Volume* 2005;87B:937-9.
- Riddle DL, et al. Psychological health impact on 2-year changes in pain and function in persons with knee pain: Data from the osteoarthritis initiative. *Osteoarthritis and Cartilage* 2011;19:1095-101.
- Riebel GD, et al. Early failure of the femoral component in unicompartmental knee arthroplasty. *The Journal of arthroplasty* 1995;1995/10/01:615-21.
- Rienmuller A, et al. The effect of femoral component rotation on the five-year outcome of cemented mobile bearing total knee arthroplasty. *International orthopaedics* 2012;2012/08/02:2067-72.
- Ring D, et al. Treatment of deformity of the lower limb in adults who have osteogenesis imperfecta. *Journal of Bone and Joint Surgery - Series A* 1996;78:220-5.
- Rinonapoli E, et al. Arthroplasty of the knee using total condylar prosthesis. Long term results (10 to 17 years) and survival analysis. *Revue de chirurgie orthopedique et repara-trice de l'appareil moteur* 1994;80:223-9.
- Riordan EA, et al. The health and structural consequences of acute knee injuries involving rupture of the anterior cruciate ligament. *Rheumatic diseases clinics of North America* 2013;2013/01/15:107-22.
- Riskowski J, et al. Arthritis, foot pain and shoe wear: Current musculoskeletal research on feet. *Current opinion in rheumatology* 2011;23:148-55.
- Ritter MA, et al. Long-term deterioration of joint evaluation scores. *The Journal of bone and joint surgery British volume* 2004;2004/05/06:438-42.
- Ritter MA, et al. The clinical effect of gender on outcome of total knee arthroplasty. *The Journal of arthroplasty* 2008;2008/03/25:331-6.
- Robbins SM, et al. Association of pain with frequency and magnitude of knee loading in knee osteoarthritis. *Arthritis care & research* 2011;2011/04/13:991-7.

- Robbins SMK, et al. Comparative diagnostic accuracy of knee adduction moments in knee osteoarthritis: A case for not normalizing to body size. *Journal of biomechanics* 2011;44:968-71.
- Robinson SP, et al. Insufficiency Fracture of the Acetabular Medial Wall. *Journal of Arthroplasty* 2007;22:768-70.
- Robon MJ, et al. The relationship between ankle plantar flexor muscle moments and knee compressive forces in subjects with and without pain. *Clinical Biomechanics* 2000;15:522-7.
- Rodgers JA, et al. Preoperative physical therapy in primary total knee arthroplasty. *The Journal of arthroplasty* 1998;1998/06/30:414-21.
- Rolaufts B, et al. Vulnerability of the superficial zone of immature articular cartilage to compressive injury. *Arthritis and rheumatism* 2010;2010/06/18:3016-27.
- Rolland E. L'osteotomie de valgisation. / Valgisation osteotomy. *Journal de Traumatologie du Sport* 2001;18:184-92.
- Romero J, et al. The clinical consequences of flexion gap asymmetry in total knee arthroplasty. *The Journal of arthroplasty* 2007;2007/02/06:235-40.
- Roos EM, et al. Positive effects of moderate exercise on glycosaminoglycan content in knee cartilage: a four-month, randomized, controlled trial in patients at risk of osteoarthritis. *Arthritis and rheumatism* 2005;2005/11/01:3507-14.
- Rosemann T. Evidence based therapy of degenerative joint diseases - Surgical treatment options. *Zeitschrift fur Allgemeinmedizin* 2008;84:21-7.
- Rosenberger RE, et al. Improved accuracy of component alignment with the implementation of image-free navigation in total knee arthroplasty. *Knee surgery, sports traumatology, arthroscopy : official journal of the ESSKA* 2008;2007/12/25:249-57.
- Roth SH, et al. Efficacy and safety of a topical diclofenac solution (pennsaid) in the treatment of primary osteoarthritis of the knee: a randomized, double-blind, vehicle-controlled clinical trial. *Archives of internal medicine* 2004;2004/10/13:2017-23.
- Ru JY, et al. Hybrid metal-on-metal hip surface arthroplasty in 18 cases: 2 -year follow-up study. *Journal of Clinical Rehabilitative Tissue Engineering Research* 2008;12:770-4.
- Rudolph KS, et al. Age-related changes in strength, joint laxity, and walking patterns: are they related to knee osteoarthritis? *Physical Therapy* 2007;87:1422-32.
- Russell EM, et al. Lateral wedges decrease biomechanical risk factors for knee osteoarthritis in obese women. *Journal of biomechanics* 2011;44:2286-91.
- Rutherford DJ, et al. Foot progression angle and the knee adduction moment: a cross-sectional investigation in knee osteoarthritis. *Osteoarthritis and Cartilage* 2008;16:883-9.
- Rutherford DJ, et al. The neuromuscular demands of altering foot progression angle during gait in asymptomatic individuals and those with knee osteoarthritis. *Osteoarthritis and Cartilage* 2010;18:654-61.
- Rutherford DJ, et al. Neuromuscular alterations exist with knee osteoarthritis presence and severity despite walking velocity similarities. *Clinical biomechanics (Bristol, Avon)* 2011;2010/12/28:377-83.
- Rutherford DJ, et al. Changes in knee joint muscle activation patterns during walking associated with increased structural severity in knee osteoarthritis. *Journal of electromyography and kinesiology : official journal of the International Society of Electrophysiological Kinesiology* 2013;2013/01/30:704-11.
- Rydevik K, et al. Functioning and disability in patients with hip osteoarthritis with mild to moderate pain. *The Journal of orthopaedic and sports physical therapy* 2010;2010/09/03:616-24.
- Rytter S, et al. Clinical knee findings in floor layers with focus on meniscal status. *BMC musculoskeletal disorders* 2008;2008/10/24:144.
- Saari T, et al. Knee kinematics in medial arthrosis. Dynamic radiostereometry during active extension and weight-bearing. *Journal of biomechanics* 2005;2004/12/16:285-92.
- Sagawa Y, Jr., et al. Associations between gait and clinical parameters in patients with severe knee osteoarthritis: a multiple correspondence analysis. *Clinical biomechanics (Bristol, Avon)* 2013;2013/02/16:299-305.
- Sahin N, et al. Reactive arthritis following tetanus vaccination: A case report. *Modern Rheumatology* 2009;19:209-11.
- Saito S, et al. Bilateral fatigue fracture of the femoral components in a cruciate-retaining cementless total knee prosthesis. *Orthopedics* 2011;2011/10/01:e688-e691.
- Salih S, et al. Hip and knee replacement. *Surgery* 2013;31:482-7.
- Sambataro S, et al. A Non-Traumatic Stress Fracture of the Tibial Plateau. *PM and R* 2009;1:691-3.
- Sanchez-Ballester J, et al. Alternative surgeries for patello-femoral disorders. *Current Orthopaedics* 2006;20:121-7.
- Saragaglia D, et al. Computer-assisted double level osteotomy for severe genu varum. *Sports Medicine and Arthroscopy Review* 2008;16:91-6.
- Sarsan A, et al. Comparing the efficacy of mature mud pack and hot pack treatments for knee osteoarthritis. *Journal of Back and Musculoskeletal Rehabilitation* 2012;25:193-9.
- Sasaki T, et al. High tibial osteotomy combined with anterior displacement of the tibial tubercle for osteoarthritis of the knee. *International orthopaedics* 1986;10:31-40.
- Sasaki T, et al. Clinical evaluation of the treatment of osteoarthritic knees using a newly designed wedged insole. *Clinical orthopaedics and related research* 1987;1987/08/01:181-7.
- Satku K, et al. Stress fractures around the knee in elderly patients. A cause of acute pain in the knee. *The Journal of bone and joint surgery American volume* 1990;1990/07/01:918-22.

- Sattler M, et al. Side differences of thigh muscle cross-sectional areas and maximal isometric muscle force in bilateral knees with the same radiographic disease stage, but unilateral frequent pain - data from the osteoarthritis initiative. *Osteoarthritis and Cartilage* 2012;20:532.
- Sauer B, et al. [Acute exacerbation of tuberculous osteoarthritis of the knee caused by trauma: clinical management]. *Zeitschrift fur Orthopadie und Unfallchirurgie* 2009;2010/02/26:734-9.
- Sawitzke AD, et al. The effect of glucosamine and/or chondroitin sulfate on the progression of knee osteoarthritis: A report from the glucosamine/chondroitin arthritis intervention trial. *Arthritis and rheumatism* 2008;58:3183-91.
- Sawitzke AD, et al. Clinical efficacy and safety of glucosamine, chondroitin sulphate, their combination, celecoxib or placebo taken to treat osteoarthritis of the knee: 2-year results from GAIT. *Annals of the rheumatic diseases* 2010;2010/06/08:1459-64.
- Sayre EC, et al. Does moderate or severe nonspecific knee injury affect radiographic osteoarthritis incidence and progression? *BMC musculoskeletal disorders* 2013;309.
- Scanlan SF, et al. Graft orientation influences the knee flexion moment during walking in patients with Anterior cruciate ligament reconstruction. *American Journal of Sports Medicine* 2009;37:2173-8.
- Scanlan SF, et al. Interactions Between Graft Placement, Gait Mechanics, and Premature Osteoarthritis Following Anterior Cruciate Ligament Reconstruction. *Journal of Experimental and Clinical Medicine* 2011;3:207-12.
- Scanlan SF, et al. The relationship between peak knee extension at heel-strike of walking and the location of thickest femoral cartilage in ACL reconstructed and healthy contralateral knees. *Journal of biomechanics* 2013;46:849-54.
- Scarvell JM, et al. Association between abnormal kinematics and degenerative change in knees of people with chronic anterior cruciate ligament deficiency: a magnetic resonance imaging study. *The Australian journal of physiotherapy* 2005;2005/12/03:233-40.
- Scarvell JM, et al. Magnetic resonance imaging analysis of kinematics in osteoarthritic knees. *The Journal of arthroplasty* 2007;2007/04/03:383-93.
- Schmitt LC, et al. Instability, laxity, and physical function in patients with medial knee osteoarthritis. *Physical Therapy* 2008;88:1506-16.
- Schneider T, et al. Recurrent dislocation of the patella and the Goldthwait operation. *Archives of orthopaedic and trauma surgery* 1997;1997/01/01:46-9.
- Schnitzer TJ, et al. Effect of piroxicam on gait in patients with osteoarthritis of the knee. *Arthritis and rheumatism* 1993;36:1207-13.
- Schultz W, et al. Gait-analytical studies in patients treated by valgus tibial head osteotomy. *Orthopade* 2003;32:331-9.
- Schwarzbach AB, et al. A joint venture. *New England Journal of Medicine* 2008;358:2496-501+2432.
- Scott RD, et al. Unicompartmental knee arthroplasty: Eight- to 12-year follow-up evaluation with survivorship analysis. *Clinical orthopaedics and related research* 1991;96-100.
- Segal NA, et al. Effects of concurrent use of an ankle support with a laterally wedged insole for medial knee osteoarthritis. *PM & R : the journal of injury, function, and rehabilitation* 2009;2009/07/25:214-22.
- Segal NA, et al. Baseline articular contact stress levels predict incident symptomatic knee osteoarthritis development in the MOST cohort. *Journal of orthopaedic research : official publication of the Orthopaedic Research Society* 2009;2009/06/18:1562-8.
- Segal NA, et al. The multicenter osteoarthritis study: Opportunities for rehabilitation research. *PM and R* 2013;5:647-54.
- Sell S, et al. Proprioception decline in the osteoarthritic knee. *Zeitschrift fur Rheumatologie* 1993;52:150-5.
- Sen C, et al. The advantages of circular external fixation used in high tibial osteotomy (average 6 years follow-up). *Knee surgery, sports traumatology, arthroscopy : official journal of the ESSKA* 2003;2003/04/02:139-44.
- Seon JK, et al. Functional comparison of total knee arthroplasty performed with and without a navigation system. *International orthopaedics* 2009;2008/07/01:987-90.
- Servien E, et al. Reliability of bony landmarks for restoration of the joint line in revision knee arthroplasty. *Knee surgery, sports traumatology, arthroscopy : official journal of the ESSKA* 2008;2007/11/30:263-9.
- Shah RR, et al. Total Hip Arthroplasty in a Patient With Myelomeningocele. *Journal of Arthroplasty* 2012;27:820.
- Shakoor N, et al. Asymmetric knee loading in advanced unilateral hip osteoarthritis. *Arthritis and rheumatism* 2003;2003/06/10:1556-61.
- Shakoor N, et al. Walking barefoot decreases loading on the lower extremity joints in knee osteoarthritis. *Arthritis and rheumatism* 2006;54:2923-7.
- Shakoor N, et al. Effects of specialized footwear on joint loads in osteoarthritis of the knee. *Arthritis and rheumatism* 2008;59:1214-20.
- Shakoor N, et al. Effects of common footwear on joint loading in osteoarthritis of the knee. *Arthritis care & research* 2010;2010/03/02:917-23.
- Shakoor N, et al. Asymmetric loading and bone mineral density at the asymptomatic knees of patients with unilateral hip osteoarthritis. *Arthritis and rheumatism* 2011;2011/12/01:3853-8.
- Shakoor N, et al. The relationship of vibratory perception to dynamic joint loading, radiographic severity, and pain in knee osteoarthritis. *Arthritis and rheumatism* 2012;2011/09/08:181-6.
- Shakoor N, et al. Improvement in knee loading after use of specialized footwear for knee osteoarthritis: results of a six-month pilot investigation. *Arthritis and rheumatism* 2013;2013/04/12:1282-9.
- Sharma L, et al. Impaired proprioception and osteoarthritis. *Current opinion in rheumatology* 1997;1997/05/01:253-8.
- Sharma L, et al. Knee adduction moment, serum hyaluronan level, and disease severity in medial tibiofemoral osteoarthritis. *Arthritis and rheumatism* 1998;41:1233-40.

- Sharma L, et al. The role of knee alignment in disease progression and functional decline in knee osteoarthritis. *JAMA : the journal of the American Medical Association* 2001;2001/07/13:188-95.
- Sharma L. The role of proprioceptive deficits, ligamentous laxity, and malalignment in development and progression of knee osteoarthritis. *The Journal of rheumatology Supplement* 2004;2004/05/11:87-92.
- Sharma L. The role of varus and valgus alignment in knee osteoarthritis. *Arthritis and rheumatism* 2007;56:1044-7.
- Sharma L, et al. Relationship of meniscal damage, meniscal extrusion, malalignment, and joint laxity to subsequent cartilage loss in osteoarthritic knees. *Arthritis and rheumatism* 2008;2008/06/03:1716-26.
- Sharma L, et al. Varus and valgus alignment and incident and progressive knee osteoarthritis. *Annals of the rheumatic diseases* 2010;2010/06/01:1940-5.
- Sharma L, et al. The role of varus and valgus alignment in the initial development of knee cartilage damage by MRI: the MOST study. *Annals of the rheumatic diseases* 2013;2012/05/03:235-40.
- Sharma V, et al. Does patellar eversion in total knee arthroplasty cause patella baja? *Clinical orthopaedics and related research* 2008;466:2763-8.
- Shefelbine SJ, et al. MRI analysis of in vivo meniscal and tibiofemoral kinematics in ACL-deficient and normal knees. *Journal of orthopaedic research : official publication of the Orthopaedic Research Society* 2006;2006/05/03:1208-17.
- Shelbourne KD, et al. Loss of normal knee motion after anterior cruciate ligament reconstruction is associated with radiographic arthritic changes after surgery. *American Journal of Sports Medicine* 2012;40:108.
- Shen Y, et al. Knee arthroplasty using rotating hinged knee systems for complex knee disease. *Journal of Clinical Rehabilitative Tissue Engineering Research* 2009;13:6931-4.
- Shetty GM, et al. Computer guided restoration of joint line and femoral offset in cruciate substituting total knee arthroplasty. *The Knee* 2012;2011/12/20:611-6.
- Shimada S, et al. Effects of disease severity on response to lateral wedged shoe insole for medial compartment knee osteoarthritis. *Archives of physical medicine and rehabilitation* 2006;2006/11/07:1436-41.
- Shin CS, et al. In vivo tibiofemoral cartilage-to-cartilage contact area of females with medial osteoarthritis under acute loading using MRI. *Journal of magnetic resonance imaging : JMRI* 2011;2011/09/29:1405-13.
- Shipley MT. Osteoarthritic knee rehabilitation in an elderly male: A functional approach. *Journal of Sports Chiropractic and Rehabilitation* 2000;14:62-9.
- Shull PB, et al. Training multi-parameter gaits to reduce the knee adduction moment with data-driven models and haptic feedback. *Journal of biomechanics* 2011;44:1605-9.
- Shull PB, et al. Toe-in gait reduces the first peak knee adduction moment in patients with medial compartment knee osteoarthritis. *Journal of biomechanics* 2013;46:122-8.
- Shull PB, et al. Six-week gait retraining program reduces knee adduction moment, reduces pain, and improves function for individuals with medial compartment knee osteoarthritis. *Journal of Orthopaedic Research* 2013;31:1020-5.
- Siebold R, et al. Posterior stability in fixed-bearing versus mobile-bearing total knee replacement: a radiological comparison of two implants. *Archives of orthopaedic and trauma surgery* 2007;2006/10/06:97-104.
- Silvertown C, et al. The prosthesis-bone interface adjacent to tibial components inserted without cement. *Clinical and radiographic follow-up at nine to twelve years. Journal of Bone and Joint Surgery - Series A* 1996;78:340-7.
- Simic M, et al. Gait modification strategies for altering medial knee joint load: a systematic review. *Arthritis care & research* 2011;2010/10/29:405-26.
- Simic M, et al. Altering foot progression angle in people with medial knee osteoarthritis: The effects of varying toe-in and toe-out angles are mediated by pain and malalignment. *Osteoarthritis and Cartilage* 2013;21:1272-80.
- Sims EL, et al. Racial differences in gait mechanics associated with knee osteoarthritis. *Aging clinical and experimental research* 2009;2010/02/16:463-9.
- Sims EL, et al. Sex differences in biomechanics associated with knee osteoarthritis. *Journal of women & aging* 2009;2010/02/26:159-70.
- Singer F, et al. Untersuchung von zwei Fragebogen hinsichtlich ihrer Eignung für die Selbstbewertung durch Patienten mit Gonarthrose: Ein Beitrag zur Qualitätssicherung in der Rheumatologie. *Acta Medica Austriaca* 1996;23:136-41.
- Sischek EL, et al. Staged medial opening wedge high tibial osteotomy for bilateral varus gonarthrosis: biomechanical and clinical outcomes. *Knee surgery, sports traumatology, arthroscopy : official journal of the ESSKA* 2013;2013/06/14.
- Skou ST, et al. Knee confidence is associated with pain, knee instability, muscle strength and dynamic varus-valgus joint motion in knee osteoarthritis. *Arthritis care & research* 2013;2013/10/16.
- Skytta ET, et al. Reliability of the hip-to-ankle radiograph in determining the knee and implant alignment after total knee arthroplasty. *Acta orthopaedica Belgica* 2011;2011/08/19:329-35.
- Sluijter ME, et al. Intra-articular application of pulsed radiofrequency for arthrogenic pain - Report of six cases. *Pain Practice* 2008;8:57-61.
- Smith Jr GN, et al. Effect of intraarticular hyaluronan injection on vertical ground reaction force and progression of osteoarthritis after anterior cruciate ligament transection. *Journal of Rheumatology* 2005;32:325-34.
- Snyder-Mackler L. Lateral wedge insoles worn for 12 months provided no symptomatic or structural benefit for people with medial knee osteoarthritis. *Journal of physiotherapy* 2011;2011/08/17:195.

- Somogyi S, et al. Sports and exercise in case of arthroses of the shoulder and knee joints Discipline, dosage and therapeutic action. *Klinikarzt* 2010;39:292-5.
- Song LL, et al. Value of dGEMRIC in diagnosing early cartilage degeneration of knee joint. *Chinese Journal of Medical Imaging Technology* 2009;25:1078-80.
- Song R, et al. A randomized study of the effects of t'ai chi on muscle strength, bone mineral density, and fear of falling in women with osteoarthritis. *Journal of alternative and complementary medicine* 2010;16:227-33.
- Song Y, et al. Meniscectomy alters the dynamic deformational behavior and cumulative strain of tibial articular cartilage in knee joints subjected to cyclic loads. *Osteoarthritis and Cartilage* 2008;16:1545-54.
- Sontag L, et al. An uncommon cause of gait disturbance and cognitive decline. *Clinical Geriatrics* 2008;16:21-4.
- Soran N, et al. Radiological findings and its relation with clinical parameters in knee osteoarthritis. *Turkiye Fiziksel Tip ve Rehabilitasyon Dergisi* 2008;54:59-62.
- Souza RB, et al. The effects of acute loading on T1rho and T2 relaxation times of tibiofemoral articular cartilage. *Osteoarthritis and cartilage / OARS, Osteoarthritis Research Society* 2010;2010/10/19:1557-63.
- Sowers M, et al. Performance-based physical functioning in African-American and Caucasian women at midlife: considering body composition, quadriceps strength, and knee osteoarthritis. *American journal of epidemiology* 2006;2006/03/24:950-8.
- Sowers M, et al. Associations of anatomical measures from MRI with radiographically defined knee osteoarthritis score, pain, and physical functioning. *The Journal of bone and joint surgery American volume* 2011;2011/01/27:241-51.
- Sørensen TJ, et al. The Association Between Submaximal Quadriceps Force Steadiness and the Knee Adduction Moment During Walking in Patients With Knee Osteoarthritis. *Journal of orthopaedic and sports physical therapy* 2011;41:592-9.
- Specogna AV, et al. Radiographic measures of knee alignment in patients with varus gonarthrosis: effect of weightbearing status and associations with dynamic joint load. *The American journal of sports medicine* 2007;2006/09/26:65-70.
- Spector TD, et al. Effect of risedronate on joint structure and symptoms of knee osteoarthritis: results of the BRISK randomized, controlled trial [ISRCTN01928173]. *Arthritis research & therapy* 2005;2005/05/19:R625-R633.
- Spencer BA, et al. Initial experience with custom-fit total knee replacement: intra-operative events and long-leg coronal alignment. *International orthopaedics* 2009;2008/12/23:1571-5.
- Squire MW, et al. Unicompartmental knee replacement: A minimum 15 year followup study. *Clinical orthopaedics and related research* 1999;61-72.
- Stattin EL, et al. Familial osteochondritis dissecans associated with early osteoarthritis and disproportionate short stature. *Osteoarthritis and Cartilage* 2008;16:890-6.
- Stefanik JJ, et al. Association between patella alta and the prevalence and worsening of structural features of patellofemoral joint osteoarthritis: the multicenter osteoarthritis study. *Arthritis care & research* 2010;2010/05/28:1258-65.
- Stein V, et al. Pattern of joint damage in persons with knee osteoarthritis and concomitant ACL tears. *Rheumatology international* 2012;2011/01/22:1197-208.
- Steiner S, et al. Effects of firocoxib therapy on progression of osteoarthritis in a canine model. *Current Orthopaedic Practice* 2009;20:304-12.
- Stephen Wilson JL, et al. The association between knee joint biomechanics and neuromuscular control and moderate knee osteoarthritis radiographic and pain severity. *Osteoarthritis and cartilage / OARS, Osteoarthritis Research Society* 2011;2010/11/16:186-93.
- Steultjens M, et al. Joint proprioception, muscle strength, and functional ability in patients with osteoarthritis of the knee. *Arthritis and rheumatism* 2007;57:787-93.
- Steven Borland W, et al. In vivo detachment of a tibial stemmed component and subsequent extraction. *The Knee* 2013;20:148-50.
- Stief F, et al. Dynamic loading of the knee and hip joint and compensatory strategies in children and adolescents with varus malalignment. *Gait and Posture* 2011;33:490-5.
- Stitik TP, et al. Osteoarthritis of the knee and hip: Part 2 - Keys to successful nondrug therapy. *Consultant* 1999;39:1975-81.
- Street BD, et al. The effects of an adopted narrow gait on the external adduction moment at the knee joint during level walking: Evidence of asymmetry. *Human Movement Science* 2013.
- Strutzenberger G, et al. Effects of obesity on the biomechanics of stair-walking in children. *Gait and Posture* 2011;34:119-25.
- Stuart MJ, et al. Late recurrence of varus deformity after proximal tibial osteotomy. *Clinical orthopaedics and related research* 1990;61-5.
- Sturnieks DL, et al. Muscle activations to stabilize the knee following arthroscopic partial meniscectomy. *Clinical Biomechanics* 2011;26:292-7.
- Sun Y, et al. Calcium deposition in osteoarthritic meniscus and meniscal cell culture. *Arthritis research & therapy* 2010;2010/04/01:R56.
- Suri P, et al. Epidemiology of osteoarthritis and associated comorbidities. *PM & R : the journal of injury, function, and rehabilitation* 2012;2012/06/01:S10-S19.
- Suter E, et al. One-year changes in hind limb kinematics, ground reaction forces and knee stability in an experimental model of osteoarthritis. *Journal of biomechanics* 1998;1998/10/01:511-7.
- Suzuki R, et al. Etiology of osteoarthritis of the knee joint. *Fukushima journal of medical science* 1967;14:55-87.
- Svetlova MS, et al. Clinicoinstrumental and laboratory characteristics of early stages of gonarthrosis. *Terapevticheskii Arkhiv* 2010;82:54-8.
- Sy MH, et al. A new case of tibial stress fracture as a complication of knee osteoarthritis. *Revue de chirurgie orthopédique et réparatrice de l'appareil moteur* 1995;81:445-8.

- Tabak AY, et al. Bilateral total knee arthroplasty in chronic, neglected congenital dislocation: A case report. *European Journal of Orthopaedic Surgery and Traumatology* 2010;20:423-7.
- Takacs J, et al. The effect of contralateral pelvic drop and trunk lean on frontal plane knee biomechanics during single limb standing. *Journal of biomechanics* 2012;45(16):2791-6.
- Takacs J, et al. Lower body positive pressure: An emerging technology in the battle against knee osteoarthritis? *Clinical interventions in aging* 2013;8:983-91.
- Takahashi A, et al. Patellar morphology and femoral component geometry influence patellofemoral contact stress in total knee arthroplasty without patellar resurfacing. *Knee surgery, sports traumatology, arthroscopy : official journal of the ESSKA* 2012;2011/11/17:1787-95.
- Takai S, et al. Revision total knee arthroplasty after failed high tibial osteotomy. *Bulletin: Hospital for Joint Diseases* 1997;56:245-50.
- Takigami H, et al. An evaluation of the velocity of the lateral thrust in osteoarthritic knees with a varus deformity. *The Knee* 2000;7:11-5.
- Talbot LA, et al. A home-based protocol of electrical muscle stimulation for quadriceps muscle strength in older adults with osteoarthritis of the knee. *Journal of Rheumatology* 2003;30:1571-8.
- Tallroth K, et al. Ankle osteoarthritis is associated with knee osteoarthritis. Conclusions based on mechanical axis radiographs. *Archives of orthopaedic and trauma surgery* 2008;2007/11/22:555-60.
- Talmo CT, et al. Total joint replacement in the elderly patient. *Clinics in Geriatric Medicine* 2010;26:517-29.
- Tamaki M, et al. In vivo kinematic analysis of a high-flexion posterior stabilized fixed-bearing knee prosthesis in deep knee-bending motion. *The Journal of arthroplasty* 2008;2008/06/17:879-85.
- Tanaka A, et al. Three-dimensional kinematics during deep-flexion kneeling in mobile-bearing total knee arthroplasty. *The Knee* 2011;2010/09/14:412-6.
- Tanaka Y. Gait analysis of patients with osteoarthritis of the hip and the those with total hip arthroplasty. *Bio-Medical Materials and Engineering* 1998;8:187-96.
- Tang SFT, et al. Improvement of muscle strength in osteoarthritic knee patients after intraarticular knee injection of hyaluronan. *American Journal of Physical Medicine and Rehabilitation* 2005;84:274-7.
- Tang SY, et al. Local tissue properties of human osteoarthritic cartilage correlate with magnetic resonance T(1) rho relaxation times. *Journal of orthopaedic research : official publication of the Orthopaedic Research Society* 2011;2011/03/30:1312-9.
- Tareef AA. Falls in the elderly: Spectrum and prevention. *Canadian Family Physician* 2011;57:771-6.
- Tashiro Y, et al. Minimally invasive versus standard approach in total knee arthroplasty. *Clinical orthopaedics and related research* 2007;144:50.
- Tashman S, et al. Kinematics of the ACL-deficient canine knee during gait: serial changes over two years. *Journal of orthopaedic research : official publication of the Orthopaedic Research Society* 2004;2004/08/12:931-41.
- Teichtahl AJ, et al. A comparison of gait patterns between the offspring of people with medial tibiofemoral osteoarthritis and normal controls. *Clinical and Experimental Rheumatology* 2003;21:421-3.
- Teichtahl AJ, et al. The relationship between the knee adduction moment and knee pain in middle-aged women without radiographic osteoarthritis. *The Journal of rheumatology* 2006;2006/09/09:1845-8.
- Teichtahl AJ, et al. Sagittal plane movement at the tibiofemoral joint influences patellofemoral joint structure in healthy adult women. *Osteoarthritis and cartilage / OARS, Osteoarthritis Research Society* 2006;2006/01/24:331-6.
- Teichtahl AJ, et al. Frontal plane knee alignment is associated with a longitudinal reduction in patella cartilage volume in people with knee osteoarthritis. *Osteoarthritis and cartilage / OARS, Osteoarthritis Research Society* 2008;2008/01/16:851-4.
- Teichtahl AJ, et al. Occupational activity is associated with knee cartilage morphology in females. *Maturitas* 2010;2010/02/16:72-6.
- Teixeira LF, et al. Relationship between alignment and kinematic and kinetic measures of the knee of osteoarthritic elderly subjects in level walking. *Clinical biomechanics (Bristol, Avon)* 1996;1996/04/01:126-34.
- Teixeira PEP, et al. Effects of Impairment-Based Exercise on Performance of Specific Self- Reported Functional Tasks in Individuals With Knee Osteoarthritis. *Physical Therapy* 2011;91:1752-65.
- Tenforde AS, et al. Neuromuscular prehabilitation to prevent osteoarthritis after a traumatic joint injury. *PM & R : the journal of injury, function, and rehabilitation* 2012;2012/06/01:S141-S144.
- Teoh JC, et al. Investigation of the biomechanical effect of variable stiffness shoe on external knee adduction moment in various dynamic exercises. *Journal of foot and ankle research* 2013;39.
- Tetsworth K, et al. Malalignment and degenerative arthropathy. *Orthopedic Clinics of North America* 1994;25:367-77.
- Tey IK, et al. Stress fracture of the distal tibia secondary to severe knee osteoarthritis: a case report. *Journal of orthopaedic surgery (Hong Kong)* 2006;2006/08/18:212-5.
- Thompson JA, et al. Gluteus maximus and soleus compensate for simulated quadriceps atrophy and activation failure during walking. *Journal of biomechanics* 2013;46:2165-72.
- Thorndike EA, et al. In search of an animal model for postmenopausal diseases. *Frontiers in bioscience : a journal and virtual library* 1998;1998/04/18:c17-c26.
- Thorp LE, et al. Bone mineral density in the proximal tibia varies as a function of static alignment and knee adduction angular momentum in individuals with medial knee osteoarthritis. *Bone* 2006;2006/06/20:1116-22.

- Thorp LE, et al. Knee joint loading differs in individuals with mild compared with moderate medial knee osteoarthritis. *Arthritis and rheumatism* 2006;2006/11/30:3842-9.
- Thorp LE, et al. Relationship between pain and medial knee joint loading in mild radiographic knee osteoarthritis. *Arthritis and rheumatism* 2007;2007/10/02:1254-60.
- Thorp LE, et al. The biomechanical effects of focused muscle training on medial knee loads in OA of the knee: A pilot, proof of concept study. *Journal of Musculoskeletal Neuronal Interactions* 2010;10:166-73.
- Thorstensson CA, et al. Reduced functional performance in the lower extremity predicted radiographic knee osteoarthritis five years later. *Annals of the rheumatic diseases* 2004;63:402-7.
- Thorstensson CA, et al. The effect of eight weeks of exercise on knee adduction moment in early knee osteoarthritis--a pilot study. *Osteoarthritis and cartilage / OARS, Osteoarthritis Research Society* 2007;2007/05/01:1163-70.
- Tibesku CO, et al. Sagittal plane kinematics of fixed- and mobile-bearing total knee replacements. *Knee surgery, sports traumatology, arthroscopy : official journal of the ESSKA* 2011;2011/03/25:1488-95.
- Tigani D, et al. Total knee arthroplasty in patients with poliomyelitis. *The Knee* 2009;2009/05/16:501-6.
- Tjornstrand B, et al. Prediction of long-term outcome of tibial osteotomy in medial gonarthrosis. *Archives of orthopaedic and traumatic surgery Archiv fur orthopadische und Unfall-Chirurgie* 1985;1985/01/01:396-401.
- Toda Y, et al. Usefulness of an insole with subtalar strapping for analgesia in patients with medial compartment osteoarthritis of the knee. *Arthritis Care and Research* 2002;47:468-73.
- Toda Y, et al. Dynamic effect of an elastically strapped lateral wedged insole on the subtalar joint in convenient foot print analysis using facsimile paper. *Modern Rheumatology* 2003;13:215-9.
- Tohyama H, et al. Treatment of osteoarthritis of the knee with heel wedges. *International orthopaedics* 1991;1991/01/01:31-3.
- Toksvig-Larsen S, et al. The porous-coated anatomic total knee experience: Special emphasis on complications and wear. *Journal of Arthroplasty* 1996;11:11-7.
- Torner Baduelli CE, et al. Arthroplasty of the femoro-patellar joint. *Acta orthopaedica Belgica* 1985;51:553-62.
- Torry MR. Scientific and clinical advances leading to improved treatment of knee osteoarthritis. *Medicine and science in sports and exercise* 2008;40:191-2.
- Troelsen A, et al. Opinions among Danish knee surgeons about indications to perform total knee replacement showed considerable variation. *Danish medical journal* 2012;59.
- Tsai LC, et al. Increased hip and knee flexion during landing decreases tibiofemoral compressive forces in women who have undergone anterior cruciate ligament reconstruction. *The American journal of sports medicine* 2013;2012/12/29:423-9.
- Tsuji S, et al. Is minimally invasive surgery-total knee arthroplasty truly less invasive than standard total knee arthroplasty? A quantitative evaluation. *Journal of Arthroplasty* 2010;25:970-6.
- Tsuneizumi Y, et al. Evaluation of joint laxity against distal traction force upon flexion in cruciate-retaining and posterior-stabilized total knee arthroplasty. *Journal of orthopaedic science : official journal of the Japanese Orthopaedic Association* 2008;2008/12/18:504-9.
- Tufan A, et al. Familial influence on tibiofemoral alignment. *Annals of the rheumatic diseases* 2010;2009/04/09:542-5.
- Turcot K, et al. The responsiveness of three-dimensional knee accelerations used as an estimation of knee instability and loading transmission during gait in osteoarthritis patient's follow-up. *Osteoarthritis and Cartilage* 2009;17:213-9.
- Turcot K, et al. Does knee alignment influence gait in patients with severe knee osteoarthritis? *Clinical Biomechanics* 2012;28(1):34-9.
- Turpin KM, et al. Biomechanical and clinical outcomes with shock-absorbing insoles in patients with knee osteoarthritis: immediate effects and changes after 1 month of wear. *Archives of physical medicine and rehabilitation* 2012;2012/01/17:503-8.
- Uebelhart D, et al. Intermittent treatment of knee osteoarthritis with oral chondroitin sulfate: a one-year, randomized, double-blind, multicenter study versus placebo. *Osteoarthritis and cartilage / OARS, Osteoarthritis Research Society* 2004;2004/03/17:269-76.
- Unsal S, et al. Comparison of effectiveness of intraarticular sodium hyaluronat and physical therapy applications in patients with knee osteoarthritis: Randomized prospective study. *Journal of Rheumatology and Medical Rehabilitation* 2008;19:16-22.
- Uysal G, et al. Diz Osteoartriti. / Knee Osteoarthritis. *Turkiye Fiziksel Tip ve Rehabilitasyon Dergisi* 2009;55:1-7.
- Valente G, et al. Influence of weak hip abductor muscles on joint contact forces during normal walking: probabilistic modeling analysis. *Journal of biomechanics* 2013;2013/07/31:2186-93.
- Valtonen A, et al. Muscle deficits persist after unilateral knee replacement and have implications for rehabilitation. *Physical Therapy* 2009;89:1072-9.
- van den Heever DJ, et al. Contact stresses in a patient-specific unicompartmental knee replacement. *Clinical Biomechanics* 2011;26:159-66.
- van den Noort J, et al. Ambulatory measurement of the knee adduction moment in patients with osteoarthritis of the knee. *Journal of biomechanics* 2013;46:43-9.
- van der Esch M, et al. Structural joint changes, malalignment, and laxity in osteoarthritis of the knee. *Scandinavian journal of rheumatology* 2005;2005/10/01:298-301.
- van der Esch M, et al. Knee varus-valgus motion during gait - a measure of joint stability in patients with osteoarthritis? *Osteoarthritis and Cartilage* 2008;16:522-5.

- van der Esch M, et al. Self-reported knee instability and activity limitations in patients with knee osteoarthritis: results of the Amsterdam osteoarthritis cohort. *Clinical rheumatology* 2012;2012/06/26:1505-10.
- van Dijk GM, et al. Course of functional status and pain in osteoarthritis of the hip or knee: a systematic review of the literature. *Arthritis and rheumatism* 2006;2006/10/03:779-85.
- van Dijk GM, et al. Prognosis of Limitations in Activities in Osteoarthritis of the Hip or Knee: A 3-Year Cohort Study. *Archives of physical medicine and rehabilitation* 2010;91:58-66.
- van Duren BH, et al. Bicruciate substituting total knee replacement: how effective are the added kinematic constraints in vivo? *Knee surgery, sports traumatology, arthroscopy : official journal of the ESSKA* 2012;2011/11/30:2002-10.
- van Haselen RA, et al. A randomized controlled trial comparing topical piroxicam gel with a homeopathic gel in osteoarthritis of the knee. *Rheumatology (Oxford, England)* 2000;2000/07/26:714-9.
- van Jonbergen HP, et al. Distal femoral bone mineral density decreases following patellofemoral arthroplasty: 1-year follow-up study of 14 patients. *BMC musculoskeletal disorders* 2010;2010/04/22:74.
- Van Jonbergen HPW, et al. Patellofemoral arthroplasty for symptomatic nonunion after trochlear osteotomy for patellar instability: A case report. *Cases Journal* 2009;2.
- Vanwanseele B, et al. Frontal knee alignment: three-dimensional marker positions and clinical assessment. *Clinical orthopaedics and related research* 2009;2008/10/09:504-9.
- Vanwanseele B, et al. The relationship between knee adduction moment and cartilage and meniscus morphology in women with osteoarthritis. *Osteoarthritis and cartilage / OARS, Osteoarthritis Research Society* 2010;2010/04/27:894-901.
- varez-Nemegyei J. Risk factors for pes anserinus tendinitis/bursitis syndrome: a case control study. *Journal of clinical rheumatology : practical reports on rheumatic & musculoskeletal diseases* 2007;2007/04/07:63-5.
- Vavrik P, et al. [Clinical evaluation of the ceramic femoral component used for reconstruction of total knee replacement]. *Acta chirurgiae orthopaedicae et traumatologiae Cechoslovaca* 2008;2009/01/20:436-42.
- Veerapen K, et al. Clinical and radiological profile of symptomatic knee osteoarthritis in Malaysia. *APLAR Journal of Rheumatology* 2004;7:97-107.
- Verdaasdonk AL, et al. Pain and walking problems in three young people with a dislocated hip. *Nederlands tijdschrift voor geneeskunde* 2001;145:1097-101.
- Verdaasdonk AL, et al. [Pain and gait problems in 3 (almost) adolescents with a dislocated hip]. *Nederlands tijdschrift voor geneeskunde* 2001;2001/07/14:1097-101.
- vies-Tuck ML, et al. Association between meniscal tears and the peak external knee adduction moment and foot rotation during level walking in postmenopausal women without knee osteoarthritis: a cross-sectional study. *Arthritis research & therapy* 2008;2008/05/22:R58.
- vies-Tuck ML, et al. Meniscal tear and increased tibial plateau bone area in healthy post-menopausal women. *Osteoarthritis and cartilage / OARS, Osteoarthritis Research Society* 2008;2007/12/21:268-71.
- Vignon E, et al. Osteoarthritis of the knee and hip and activity: a systematic international review and synthesis (OASIS). *Joint, bone, spine : revue du rhumatisme* 2006;2006/06/17:442-55.
- Vilensky JA, et al. Serial kinematic analysis of the unstable knee after transection of the anterior cruciate ligament: Temporal and angular changes in a canine model of osteoarthritis. *Journal of Orthopaedic Research* 1994;12:229-37.
- Vincent KR, et al. The pathophysiology of osteoarthritis: a mechanical perspective on the knee joint. *PM & R : the journal of injury, function, and rehabilitation* 2012;2012/06/01:S3-S9.
- Viriyavejkul P, et al. Comparison of characteristics of patients with and without calcium pyrophosphate dihydrate crystal deposition disease who underwent total knee replacement surgery for osteoarthritis. *Osteoarthritis and cartilage / OARS, Osteoarthritis Research Society* 2007;2006/10/19:232-5.
- von Bormann RPB. Clinical outcome of double-bundle anterior cruciate ligament reconstruction. *Operative Techniques in Sports Medicine* 2008;16:171-5.
- von Eisenhart-Rothe R, et al. Tibiofemoral and patellofemoral joint 3D-kinematics in patients with posterior cruciate ligament deficiency compared to healthy volunteers. *BMC musculoskeletal disorders* 2012;2012/11/28:231.
- Wada J, et al. Natural course of osteoarthritis of the knee treated with or without intraarticular corticosteroid injections. *Bulletin: Hospital for Joint Diseases* 1993;53:45-8.
- Wada M, et al. Relationship between gait and clinical results after high tibial osteotomy. *Clinical orthopaedics and related research* 1998;1998/10/02:180-8.
- Wada M, et al. Relationships among bone mineral densities, static alignment and dynamic load in patients with medial compartment knee osteoarthritis. *Rheumatology (Oxford, England)* 2001;2001/05/24:499-505.
- Wajima D, et al. Spinal subdural hematoma associated with traumatic intracranial interhemispheric subdural hematoma. *Neurologia Medico-Chirurgica* 2012;52:636-9.
- Walker EA, et al. Rapidly progressive osteoarthritis: biomechanical considerations. *Magnetic resonance imaging clinics of North America* 2011;2011/06/15:283-94.
- Waller B, et al. Effects of a progressive aquatic resistance exercise program on the biochemical composition and morphology of cartilage in women with mild knee osteoarthritis: protocol for a randomised controlled trial. *BMC musculoskeletal disorders* 2013;2013/03/19:82.

- Waller C, et al. Unload it: the key to the treatment of knee osteoarthritis. *Knee surgery, sports traumatology, arthroscopy : official journal of the ESSKA* 2011;2011/02/08:1823-9.
- Wallny T, et al. Intra-articular hyaluronic acid in the treatment of haemophilic arthropathy of the knee. *Clinical, radiological and sonographical assessment. Haemophilia : the official journal of the World Federation of Hemophilia* 2000;2000/09/30:566-70.
- Walter JP, et al. Decreased knee adduction moment does not guarantee decreased medial contact force during gait. *Journal of Orthopaedic Research* 2010;28:1348-54.
- Wang CJ. Management of patellofemoral arthrosis in middle-aged patients. *Chang Gung medical journal* 2001;2002/02/01:672-80.
- Wang Y, et al. Factors affecting tibial plateau expansion in healthy women over 2.5 years: a longitudinal study. *Osteoarthritis and cartilage / OARS, Osteoarthritis Research Society* 2006;2006/06/21:1258-64.
- Watanabe K, et al. Outcomes of knee arthrodesis following infected total knee arthroplasty: a retrospective analysis of 8 cases. *Modern rheumatology / the Japan Rheumatism Association* 2013;2013/03/20.
- Webster KE, et al. The knee adduction moment in hamstring and patellar tendon anterior cruciate ligament reconstructed knees. *Knee surgery, sports traumatology, arthroscopy : official journal of the ESSKA* 2012;2011/12/27:2214-9.
- Weidenhielm L, et al. Change in adduction moment about the knee after high tibial osteotomy and prosthetic replacement in osteoarthritis of the knee. *Clinical Biomechanics* 1992;7:91-6.
- Weidenhielm L, et al. Improvement in gait one year after surgery for knee osteoarthritis: a comparison between high tibial osteotomy and prosthetic replacement in a prospective randomized study. *Scandinavian journal of rehabilitation medicine* 1993;1993/03/01:25-31.
- Weidenhielm L, et al. Adduction moment of the knee compared to radiological and clinical parameters in moderate medial osteoarthritis of the knee. *Annales Chirurgiae et Gynaecologiae* 1994;83:236-42.
- Weidenhielm L, et al. Surgical correction of leg alignment in unilateral knee osteoarthritis reduces the load on the hip and knee joint bilaterally. *Clinical Biomechanics* 1995;10:217-21.
- Weidow J, et al. Medial and lateral osteoarthritis of the knee is related to variations of hip and pelvic anatomy. *Osteoarthritis and cartilage / OARS, Osteoarthritis Research Society* 2005;2005/06/01:471-7.
- Weidow J. Lateral osteoarthritis of the knee. Etiology based on morphological, anatomical, kinematic and kinetic observations. *Acta orthopaedica Supplementum* 2006;2006/08/05:3-44.
- Wenham CYJ, et al. New horizons in osteoarthritis. *Age and Ageing* 2013;42:272-8.
- Westlake CG, et al. Do thigh circumference and mass changes alter knee biomechanics during walking? *Gait & posture* 2013;37:359-62.
- Wexler G, et al. Functional gait adaptations in patients with anterior cruciate ligament deficiency over time. *Clinical orthopaedics and related research* 1998;166-75.
- Wheeler JW, et al. Real-time knee adduction moment feedback for gait retraining through visual and tactile displays. *Journal of biomechanical engineering* 2011;133:041007.
- White DK, et al. Do worsening knee radiographs mean greater chances of severe functional limitation? *Arthritis care & research* 2010;2010/05/28:1433-9.
- White DK, et al. Clinically important improvement in function is common in people with or at high risk of knee OA: the MOST study. *The Journal of rheumatology* 2010;2010/04/17:1244-51.
- White DK, et al. Is symptomatic knee osteoarthritis a risk factor for a fast decline in gait speed? Results from the osteoarthritis initiative. *Arthritis care & research* 2012;2012/08/18.
- White DK, et al. When it hurts, a positive attitude may help: association of positive affect with daily walking in knee osteoarthritis. Results from a multicenter longitudinal cohort study. *Arthritis care & research* 2012;2012/04/17:1312-9.
- White DK, et al. Walking to meet physical activity guidelines in knee osteoarthritis: Is 10,000 steps enough? *Archives of physical medicine and rehabilitation* 2013;94:711-7.
- White DK, et al. Do radiographic disease and pain account for why people with or at high risk of knee osteoarthritis do not meet physical activity guidelines? *Arthritis and rheumatism* 2013;2012/11/06:139-47.
- White DK, et al. Is symptomatic knee osteoarthritis a risk factor for a trajectory of fast decline in gait speed? Results from a longitudinal cohort study. *Arthritis care & research* 2013;2012/08/18:187-94.
- White DK, et al. Reasons for Functional Decline Despite Reductions in Knee Pain: The Multicenter Osteoarthritis Study. *Physical Therapy* 2011;91:1849-56.
- Widmyer MR, et al. High body mass index is associated with increased diurnal strains in the articular cartilage of the knee. *Arthritis and rheumatism* 2013;2013/07/03:2615-22.
- Widuchowski W, et al. Femoral press-fit fixation in ACL reconstruction using bone-patellar tendon-bone autograft: results at 15 years follow-up. *BMC musculoskeletal disorders* 2012;2012/06/29:115.
- Williams HJ, et al. Comparison of naproxen and acetaminophen in a two-year study of treatment of osteoarthritis of the knee. *Arthritis and rheumatism* 1993;36:1196-206.
- Wilson AJ, et al. TKA after clamshell osteotomy for femoral diaphyseal malunion. *Orthopedics* 2012;35:e969-e972.
- Wilson DR, et al. The Measurement of Joint Mechanics and Their Role in Osteoarthritis Genesis and Progression. *Medical Clinics of North America* 2009;93:67-82.

- Wilson FC. Total replacement of the knee in rheumatoid arthritis. Part II of a prospective study. CLIN ORTHOP 1973;no.94:58-64.
- Wilson JL, et al. The association between knee joint biomechanics and neuromuscular control and moderate knee osteoarthritis radiographic and pain severity. Osteoarthritis and Cartilage 2011.
- Winby CR, et al. Muscle and external load contribution to knee joint contact loads during normal gait. Journal of biomechanics 2009;42:2294-300.
- Windisch C, et al. Osteodensitometry measurements of periprosthetic bone using dual energy X-ray absorptiometry following total knee arthroplasty. Archives of orthopaedic and trauma surgery 2012;2012/08/14:1595-601.
- Windsor RE, et al. Technical considerations of total knee arthroplasty after proximal tibial osteotomy. The Journal of bone and joint surgery American volume 1988;1988/04/01:547-55.
- Wirtz C, et al. Knee axis deviations - Cause of knee osteoarthritis? Schweizerische Zeitschrift fur Sportmedizin und Sporttraumatologie 2011;59:169-73.
- Wluka AE, et al. Knee cartilage loss in symptomatic knee osteoarthritis over 4.5 years. Arthritis research & therapy 2006;2006/05/18:R90.
- Wolterbeek N, et al. No differences in in vivo kinematics between six different types of knee prostheses. Knee surgery, sports traumatology, arthroscopy : official journal of the ESSKA 2012;2011/07/16:559-64.
- Woodhouse LJ. Do ibuprofen or glucosamine in addition to resistance exercise training improve muscle strength in patients with knee osteoarthritis? Clinical Journal of Sport Medicine 2012;22:290-2.
- Woollard JD, et al. Change in knee cartilage volume in individuals completing a therapeutic exercise program for knee osteoarthritis. The Journal of orthopaedic and sports physical therapy 2011;2011/09/06:708-22.
- Wright JM, et al. Observations on patellar height following opening wedge proximal tibial osteotomy. The American journal of knee surgery 2001;2001/08/09:163-73.
- Xiao J, et al. Bilateral knee lipoma arborescens combined with osteoarthritis in elderly patients. Journal of International Medical Research 2011;39:1563-9.
- Yamanaka N, et al. Posterior-anterior weight-bearing radiograph in 15 degree knee flexion in medial osteoarthritis. Skeletal radiology 2003;2003/01/15:28-34.
- Yang JH, et al. Primary total knee arthroplasty using rotating-hinge prosthesis in severely affected knees. Knee surgery, sports traumatology, arthroscopy : official journal of the ESSKA 2012;2011/07/21:517-23.
- Yang N, et al. The combined effect of frontal plane tibiofemoral knee angle and meniscectomy on the cartilage contact stresses and strains. Annals of biomedical engineering 2009;2009/08/20:2360-72.
- Yang N, Nayeb-Hashemi H, Canavan P. The effect of the frontal plane tibiofemoral angle on the stress and strain at the knee cartilage during the stance phase of the gait cycle. Northeastern University, Boston, MA, United States. 2010 p. 347-53.
- Yang NH, et al. Effect of frontal plane tibiofemoral angle on the stress and strain at the knee cartilage during the stance phase of gait. Journal of orthopaedic research : official publication of the Orthopaedic Research Society 2010;2010/10/26:1539-47.
- Yasuda K, et al. A ten- to 15-year follow-up observation of high tibial osteotomy in medial compartment osteoarthrosis. Clinical orthopaedics and related research 1992;186-95.
- Yercan H, et al. [Osteotomies in the treatment of osteochondral lesions of the knee joint]. Acta orthopaedica et traumatologica turcica 2007;2008/10/11:147-52.
- Yoshimura I, et al. Lateral thrust of anterior cruciate ligament-insufficient knees and posterior cruciate ligament-insufficient knees. International orthopaedics 2002;2002/10/16:303-5.
- Yue B, et al. In vivo function of posterior cruciate ligament before and after posterior cruciate ligament-retaining total knee arthroplasty. International orthopaedics 2012;2012/01/25:1387-92.
- Yusuf E, et al. Body mass index and alignment and their interaction as risk factors for progression of knees with radiographic signs of osteoarthritis. Osteoarthritis and cartilage / OARS, Osteoarthritis Research Society 2011;2011/07/05:1117-22.
- Zeni Jr JA, et al. Dynamic knee joint stiffness in subjects with a progressive increase in severity of knee osteoarthritis. Clinical Biomechanics 2009;24:366-71.
- Zeni Jr JA, et al. Differences in gait parameters between healthy subjects and persons with moderate and severe knee osteoarthritis: A result of altered walking speed? Clinical Biomechanics 2009;24:372-8.
- Zeni JA, et al. Alterations in quadriceps and hamstrings coordination in persons with medial compartment knee osteoarthritis. Journal of electromyography and kinesiology : official journal of the International Society of Electrophysiological Kinesiology 2010;2009/02/19:148-54.
- Zeni JA, Jr. Alterations in joint loading and muscle coordination strategies with the progression of medial compartment knee osteoarthritis University of Delaware; 2008.
- Zeni JA, Jr., et al. Dynamic knee joint stiffness in subjects with a progressive increase in severity of knee osteoarthritis [corrected] [published erratum appears in CLIN BIOMECH 2009 Jul;24(6):531]. Clinical Biomechanics 2009;24:366-71.
- Zeni JA, Jr., et al. Dynamic knee joint stiffness in subjects with a progressive increase in severity of knee osteoarthritis. Clinical biomechanics (Bristol, Avon) 2009;2009/03/03:366-71.
- Zeni JA, Jr., et al. Differences in gait parameters between healthy subjects and persons with moderate and severe knee osteoarthritis: a result of altered walking speed? Clinical biomechanics (Bristol, Avon) 2009;2009/03/17:372-8.

- Zhang HH, et al. Comparison in gait biomechanics of naturally walking patients with different knee osteoarthritis using footscan® SCS high frequency plate system. Journal of Clinical Rehabilitative Tissue Engineering Research 2010;14:8019-23.
- Zhang Y, et al. [Effect of posterior condylar offset on knee flexion after high-flex posterior-stabilized total knee arthroplasty]. Zhonghua wai ke za zhi [Chinese journal of surgery] 2010;2010/07/22:764-8.
- Zhu XY, et al. Prevalence of primary osteoporosis and osteoarthritis in 203 middle-aged and elderly women. Chinese Journal of Clinical Rehabilitation 2005;9:136-7.
- Zicat B, et al. Total knee arthroplasty in the octogenarian. The Journal of arthroplasty 1993;1993/08/01:395-400.
- Zifchock RA, et al. Are joint structure and function related to medial knee OA pain? A pilot study. Clinical orthopaedics and related research 2011;2011/07/20:2866-73.
- Zifko B, et al. Behandlung der Schienbeinkopfbrüche und ihre Ergebnisse. Archiv für Orthopädische und Unfall-Chirurgie 1969;66:297-309.
- Zilch H, et al. [Corrective osteotomies of the head of the tibia (indications, technique and results) (author's transl)]. Unfallheilkunde 1978;1978/11/01:642-8.
